# Supplementary material for: Therapist-guided and self-guided internet-delivered behavioural activation for adolescents with depression: a randomised feasibility trial
Source: PubMed Central journal article supplement — BMJ Open. 2022 Dec 26;12(12):e066357. doi: 10.1136/bmjopen-2022-066357 (PMC9806095; doi:10.1136/bmjopen-2022-066357), 2022-12-26
Supplement: bmjopen-2022-066357.draft_revisions.pdf [file bmjopen-2022-066357.draft_revisions.pdf]

# BMJ Open

BMJ Open is committed to open peer review. As part of this commitment we make the peer review history of every article we publish publicly available.

When an article is published we post the peer reviewers' comments and the authors' responses online. We also post the versions of the paper that were used during peer review. These are the versions that the peer review comments apply to.

The versions of the paper that follow are the versions that were submitted during the peer review process. They are not the versions of record or the final published versions. They should not be cited or distributed as the published version of this manuscript.

BMJ Open is an open access journal and the full, final, typeset and author-corrected version of record of the manuscript is available on our site with no access controls, subscription charges or pay-per-view fees (<http://bmjopen.bmj.com>).

If you have any questions on BMJ Open's open peer review process please email [info.bmjopen@bmj.com](mailto:info.bmjopen@bmj.com)

# BMJ Open

## Therapist-guided and self-guided Internet-delivered behavioural activation for adolescents with depression: a randomised feasibility trial

|                               |                                                                                                                                                                                                                                                                                                                                                                                                                                                                                                                                                                                                                                                                                                                                                                                                                                                                                                                                                                                                                                                                                                                                                                                                                                                                                                                                                                                                                                                                                                                                                                                                                                                                      |
|-------------------------------|----------------------------------------------------------------------------------------------------------------------------------------------------------------------------------------------------------------------------------------------------------------------------------------------------------------------------------------------------------------------------------------------------------------------------------------------------------------------------------------------------------------------------------------------------------------------------------------------------------------------------------------------------------------------------------------------------------------------------------------------------------------------------------------------------------------------------------------------------------------------------------------------------------------------------------------------------------------------------------------------------------------------------------------------------------------------------------------------------------------------------------------------------------------------------------------------------------------------------------------------------------------------------------------------------------------------------------------------------------------------------------------------------------------------------------------------------------------------------------------------------------------------------------------------------------------------------------------------------------------------------------------------------------------------|
| Journal:                      | <i>BMJ Open</i>                                                                                                                                                                                                                                                                                                                                                                                                                                                                                                                                                                                                                                                                                                                                                                                                                                                                                                                                                                                                                                                                                                                                                                                                                                                                                                                                                                                                                                                                                                                                                                                                                                                      |
| Manuscript ID                 | bmjopen-2022-066357                                                                                                                                                                                                                                                                                                                                                                                                                                                                                                                                                                                                                                                                                                                                                                                                                                                                                                                                                                                                                                                                                                                                                                                                                                                                                                                                                                                                                                                                                                                                                                                                                                                  |
| Article Type:                 | Original research                                                                                                                                                                                                                                                                                                                                                                                                                                                                                                                                                                                                                                                                                                                                                                                                                                                                                                                                                                                                                                                                                                                                                                                                                                                                                                                                                                                                                                                                                                                                                                                                                                                    |
| Date Submitted by the Author: | 05-Jul-2022                                                                                                                                                                                                                                                                                                                                                                                                                                                                                                                                                                                                                                                                                                                                                                                                                                                                                                                                                                                                                                                                                                                                                                                                                                                                                                                                                                                                                                                                                                                                                                                                                                                          |
| Complete List of Authors:     | <p>Grudin, Rebecca; Karolinska Institutet, Department of Clinical Neuroscience</p> <p>Ahlen, Johan; Karolinska Institutet, Department of Global Public Health; Region Stockholm, The Centre for Epidemiology and Community Medicine</p> <p>Mataix-Cols, David; Karolinska Institute, Centre for Psychiatry Research, Department of Clinical Neuroscience &amp; Stockholm Health Care Services, Region Stockholm, CAP Research Centre</p> <p>Lenhard, Fabian; Karolinska Institute, Centre for Psychiatry Research, Department of Clinical Neuroscience &amp; Stockholm Health Care Services, Region Stockholm, CAP Research Centre</p> <p>Henje, Eva; Umeå Universitet, Department of Clinical Science, Child- and Adolescent Psychiatry</p> <p>Månsson, Cecilia; Region Stockholm, CAMHS Trauma clinic, Child- and Adolescent Mental Health Services</p> <p>Sahlin, Hanna; Karolinska Institutet, Centre for Psychiatry Research, Department of Clinical Neuroscience, Stockholm Health Care Services, Region Stockholm, The Centre for Psychotherapy, Education and Research</p> <p>Beckman, Maria; Karolinska Institute, Centre for Psychiatry Research, Department of Clinical Neuroscience, Stockholm Health Care Services, Region Stockholm, The Centre for Psychotherapy, Education and Research</p> <p>Serlachius, Eva; Karolinska Institutet, Department of Clinical Neuroscience; Lund University, Department of Clinical Sciences, Faculty of Medicine</p> <p>Vigerland, Sarah; Karolinska Institute, Centre for Psychiatry Research, Department of Clinical Neuroscience &amp; Stockholm Health Care Services, Region Stockholm, CAP Research Centre</p> |
| Keywords:                     | Depression & mood disorders < PSYCHIATRY, MENTAL HEALTH, Child & adolescent psychiatry < PSYCHIATRY, Clinical trials < THERAPEUTICS                                                                                                                                                                                                                                                                                                                                                                                                                                                                                                                                                                                                                                                                                                                                                                                                                                                                                                                                                                                                                                                                                                                                                                                                                                                                                                                                                                                                                                                                                                                                  |
|                               |                                                                                                                                                                                                                                                                                                                                                                                                                                                                                                                                                                                                                                                                                                                                                                                                                                                                                                                                                                                                                                                                                                                                                                                                                                                                                                                                                                                                                                                                                                                                                                                                                                                                      |

SCHOLARONE™  
Manuscripts

1  
2  
3  
4  
5  
6  
7  
8  
9  
10  
11  
12  
13  
14  
15  
16  
17  
18  
19  
20  
21  
22  
23  
24  
25  
26  
27  
28  
29  
30  
31  
32  
33  
34  
35  
36  
37  
38  
39  
40  
41  
42  
43  
44  
45  
46  
47  
48  
49  
50  
51  
52  
53  
54  
55  
56  
57  
58  
59  
60

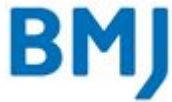

I, the Submitting Author has the right to grant and does grant on behalf of all authors of the Work (as defined in the below author licence), an exclusive licence and/or a non-exclusive licence for contributions from authors who are: i) UK Crown employees; ii) where BMJ has agreed a CC-BY licence shall apply, and/or iii) in accordance with the terms applicable for US Federal Government officers or employees acting as part of their official duties; on a worldwide, perpetual, irrevocable, royalty-free basis to BMJ Publishing Group Ltd ("BMJ") its licensees and where the relevant Journal is co-owned by BMJ to the co-owners of the Journal, to publish the Work in this journal and any other BMJ products and to exploit all rights, as set out in our [licence](#).

The Submitting Author accepts and understands that any supply made under these terms is made by BMJ to the Submitting Author unless you are acting as an employee on behalf of your employer or a postgraduate student of an affiliated institution which is paying any applicable article publishing charge ("APC") for Open Access articles. Where the Submitting Author wishes to make the Work available on an Open Access basis (and intends to pay the relevant APC), the terms of reuse of such Open Access shall be governed by a Creative Commons licence – details of these licences and which [Creative Commons](#) licence will apply to this Work are set out in our licence referred to above.

Other than as permitted in any relevant BMJ Author's Self Archiving Policies, I confirm this Work has not been accepted for publication elsewhere, is not being considered for publication elsewhere and does not duplicate material already published. I confirm all authors consent to publication of this Work and authorise the granting of this licence.

# Therapist-guided and self-guided Internet-delivered behavioural activation for adolescents with depression: a randomised feasibility trial

**Rebecca Grudin<sup>a\*</sup>, Johan Ahlen<sup>b, c</sup>, David Mataix-Cols<sup>a</sup>, Fabian Lenhard<sup>a</sup>, Eva Henje<sup>d</sup>, Cecilia Månsson<sup>e</sup>, Hanna Sahlin<sup>f</sup>, Maria Beckman<sup>f</sup>, Eva Serlachius<sup>g, h</sup>, Sarah Vigerland<sup>a</sup>**

<sup>a</sup>Centre for Psychiatry Research, Department of Clinical Neuroscience, Karolinska Institutet, & Stockholm Health Care Services, Region Stockholm, CAP Research Centre, Gävlegatan 22, SE-113 30 Stockholm, Sweden

<sup>b</sup>The Centre for Epidemiology and Community Medicine, Box 45436, SE-104 31 Stockholm, Region Stockholm, Sweden

<sup>c</sup>Department of Global Public Health, Karolinska Institutet, SE-171 77 Stockholm, Sweden

<sup>d</sup>Department of Clinical Science, Child- and Adolescent Psychiatry, Umeå University, SE-901 85 Umeå, Sweden

<sup>e</sup>Child- and Adolescent Mental Health Services, Region Stockholm, CAMHS Trauma clinic, Tideliugatan 22, SE-118 69 Stockholm, Sweden

<sup>f</sup>Centre for Psychiatry Research, Department of Clinical Neuroscience, Karolinska Institutet, & Stockholm Health Care Services, Region Stockholm, The Centre for Psychotherapy, Education & Research, Liljeholmstorget 7, SE-117 63 Stockholm, Sweden

<sup>g</sup>Department of Clinical Neuroscience, Karolinska Institutet, SE-171 77 Stockholm, Sweden

<sup>h</sup>Department of Clinical Sciences, Faculty of Medicine, Lund University, Baravägen 1, SE-222 40 Lund, Sweden

\*Correspondence to Rebecca Grudin: [rebecca.grudin@ki.se](mailto:rebecca.grudin@ki.se)

## Abstract

**Objective** Access to effective treatments for adolescents with depression needs to improve. Few studies have evaluated behavioural activation (BA) for adolescent depression, and none have evaluated remotely-delivered BA. This study explored the feasibility and acceptability of therapist-guided and self-guided Internet-delivered BA (I-BA) in preparation for a randomized controlled trial (RCT).

**Design** A pilot, single-masked randomised controlled trial.

**Setting** A specialist outpatient clinic in Sweden.

**Participants** Thirty-two adolescents with mild to moderate major depressive disorder, aged 13-17.

**Interventions** Ten weeks of therapist-guided I-BA or self-guided I-BA or treatment as usual (TAU).

**Outcomes** Feasibility measures included participant retention, acceptability, safety and satisfaction. The primary measure of clinical efficacy was the masked assessor-rated Children's Depression Rating Scale, Revised (CDRS-R) score at the 3-month follow-up.

**Results** Participant retention was acceptable, with two drop-outs. Most participants in TAU had been offered interventions by the primary endpoint. The average number of completed chapters (total 8) for adolescents was 7.5 in therapist-guided I-BA, and 5.4 in self-guided I-BA. No serious adverse events were recorded. Satisfaction was acceptable in both I-BA groups. Both I-BA groups, but not TAU, showed statistically significant changes on the primary outcome measure with large within-group effect sizes (Cohen's  $d = 2.43$  and  $2.23$  respectively).

**Conclusions** Both therapist-guided and self-guided I-BA are acceptable and potentially efficacious treatments for adolescents with depression. It is feasible to conduct a large-scale RCTs to establish the efficacy and cost-effectiveness of I-BA vs TAU.

**Trial registration number** Clinicaltrials.gov, NCT04117789.

### Article summary: Strengths and limitations of this study

- Strengths include the randomised controlled design, the use of an active control group and the careful assessment of the contents of TAU.
- Another strength was that assessors were masked to treatment allocation at the primary endpoint.
- TAU was a heterogeneous condition and masked assessors correctly guessed group allocation more often than chance.

### Keywords

Depression; Adolescents; Feasibility trial; Behavioral activation; Self-guided; Internet interventions

## Introduction

Depression is one of the leading causes of disability worldwide<sup>1</sup>. Adolescence is a risk period for developing depression, associated with a sharp increase in prevalence<sup>2</sup>. Adolescent depression is associated with a range of adverse outcomes, including impaired academic, social and work functioning<sup>3 4</sup>, poor mental and physical health in adulthood<sup>5 6</sup> and increased risk of suicide<sup>7</sup>. Early detection and treatment of adolescent depression markedly decreases the likelihood of future clinical depression and other mental health issues<sup>8</sup>.

Cognitive Behaviour Therapy (CBT) is considered a well-established intervention for adolescents with depression<sup>9</sup>, and is also currently recommended in clinical practice and national guidelines<sup>10 11</sup>. Behavioural activation (BA) is a common type of CBT for depression. The main goal of BA is to increase engagement in values-based activities and to decrease the avoidant behaviours that often maintain depressive symptoms<sup>12-15</sup>. BA is considered an evidence-based treatment for adults with depression<sup>16</sup> and three open trials indicate that BA is a feasible intervention for adolescents with depression<sup>12 13 15</sup>. A small RCT comparing BA to evidence-based interventions (CBT and IPT) showed promising results<sup>14</sup>, but BA for depressed adolescents is yet to be evaluated in an adequately powered RCT.

Despite its high prevalence, only a minority of young people with depression receive evidence-based treatments<sup>17-19</sup>. Internet-delivered CBT (ICBT) was developed to improve access to treatment, and has several potential advantages over traditional in-person treatments, e.g. bridging geographical distances between therapists and patients, requiring less therapist time<sup>20</sup>, and a lower risk of therapist drift<sup>20</sup>.

Studies in adults have shown that ICBT is effective and probably cost-effective for several psychiatric disorders, including depression<sup>20</sup>. In children and adolescents, there is growing support for the efficacy of ICBT for several psychiatric disorders<sup>21</sup>, but it is still unclear whether ICBT is an efficacious intervention for adolescent depression. To date, two RCTs (both N = 70) on ICBT with additional therapist-chat communication have shown significant reductions in depressive symptoms for adolescents with mild to moderate depression compared to attention control<sup>22 23</sup>. Two other studies, one small and one unpublished, both including adolescents with subthreshold, rather than diagnosed, depression, show mixed results<sup>24 25</sup>.



1  
2  
3 Internet-based interventions can be therapist-guided or self-guided (i.e. with or without  
4 therapist support). The importance of therapist support is unclear in children and adolescents,  
5 and results are inconsistent<sup>26 27</sup>. If ICBT could be entirely unguided, without sacrificing  
6 efficacy and safety, it would be much easier to disseminate.  
7  
8  
9

10  
11 Adequately powered trials are needed to explore whether ICBT with and without therapist-  
12 support for adolescent depression is safe, effective and cost-effective. However, there are  
13 important feasibility questions that should be addressed before conducting a large trial.  
14 Therefore, we designed a randomised feasibility trial of therapist-guided and self-guided  
15 Internet-delivered BA (I-BA), compared to treatment as usual (TAU). The primary objective  
16 of the current study was to evaluate the feasibility of the study design. Secondary objectives  
17 were to explore the acceptability of the I-BA interventions and to provide preliminary clinical  
18 efficacy data to assist in the power calculations for a future fully powered trial. This will also  
19 be the first trial to explore online delivered BA for adolescents.  
20  
21  
22  
23  
24  
25  
26  
27

## 28 **Methods**

### 29 **Study design**

30  
31 This was a single-masked randomised controlled feasibility trial of therapist-guided I-BA,  
32 self-guided I-BA and TAU for adolescents with mild to moderate major depressive disorder  
33 (MDD). Participants were randomly assigned at a 1:1:1 ratio. The study was conducted at the  
34 the Child and Adolescent Psychiatry Research Center in in Stockholm, Sweden. The planned  
35 recruitment period was six months. Masked rater assessments were conducted at  
36 posttreatment (week 11), and 3-month follow-up (primary end point) visits. No changes in the  
37 methods were made after the registration and subsequent start of the trial.  
38  
39  
40  
41  
42  
43  
44  
45  
46

### 47 **Participants**

48 Inclusion criteria were: adolescents aged 13–17; a diagnosis of mild or moderate MDD  
49 according to the *DSM-5*<sup>28</sup>; eventual use of psychotropic medications (antidepressants, central  
50 stimulants and neuroleptics) had been stable for at least 6 weeks prior to inclusion; at least  
51 one parent/caregiver able to partake in treatment; both adolescent and parent fluent in  
52 Swedish; access to a internet-connected computer.  
53  
54  
55  
56  
57  
58  
59  
60

1  
2  
3 Exclusion criteria were: acute psychiatric problems (i.e. high risk of suicide or alcohol and  
4 substance abuse); social problems requiring other actions at first hand (i.e. abuse in the  
5 family, high and prolonged absence from school); previous CBT for MDD within the last 12  
6 months (defined as  $\geq 3$  sessions of CBT/BA, other than psychoeducation); current use of  
7 benzodiazepines; ongoing psychological treatment for any psychiatric disorder.  
8  
9  
10  
11  
12

### 13 **Sample size**

14  
15 This feasibility trial was not powered to detect statistically significant differences between  
16 groups. However, we aimed to include a sufficient number of participants to explore within  
17 group changes from baseline to the primary endpoint. In two recent RCTs<sup>14,29</sup> large within  
18 group effects were found on depressive symptoms ( $d > 1.2$ ;  $d = 1.4$ ). Based on previous  
19 literature, and taking a potentially high attrition rate into account, we aimed to recruit a total  
20 of 45 participants to be able to detect a within group effect of  $d=1.2$  (alpha value of 0.05 and  
21 90% power).  
22  
23  
24  
25  
26  
27  
28

### 29 **Recruitment and procedures**

30  
31 The study was advertised at the CAMHS and primary health care clinics, in newspapers, and  
32 social media. Referrals from health care professionals and self-referrals from families all over  
33 Sweden were accepted.  
34  
35  
36  
37

38 Applicants were first contacted for an initial telephone screening, and then invited to a face-  
39 to-face visit for a thorough assessment of study eligibility. Video assessments were offered  
40 after the outbreak of the COVID-19 pandemic and to families that could not travel to the  
41 clinic. Verbal and written information was provided to the adolescents and their parents, and  
42 all provided written consent. During the face-to-face assessment, a trained psychologist a)  
43 verified the MDD diagnosis, according to the DSM-5 criteria, b) assessed current level of  
44 depression symptom severity using the CDRS-R, and c) assessed psychiatric comorbidity.  
45 After the assessment, included participants and parents completed the baseline measures and  
46 were then randomised. Within a week after completion of the baseline measures, patients  
47 allocated to the I-BA treatments started treatment, and participants allocated to TAU received  
48 a referral to their local CAMHS or paediatric primary care unit. **Figure 1** shows the  
49 CONSORT flowchart.  
50  
51  
52  
53  
54  
55  
56  
57  
58  
59  
60

1  
2  
3 To ensure patient-safety, participants in all treatment arms answered brief, weekly measures  
4 of depressive symptoms during the intervention, allowing suicidal ideation to be monitored  
5 and, if needed, assessed. If further psychiatric assessments or any preventive actions were  
6 needed, the study team referred the patient to emergency psychiatric services.  
7  
8  
9

10  
11 Follow-up assessments were conducted at post-treatment and three month follow-up by  
12 masked assessors.  
13  
14  
15

## 16 **Interventions**

17  
18 The I-BA treatment protocol was inspired by previously published literature on BA<sup>14 15</sup>. The  
19 I-BA treatments were delivered through a secure online platform and consisted of eight  
20 chapters with age-appropriate texts, animations, films and various exercises delivered over ten  
21 weeks. The first four chapters introduced the most essential components of BA (i.e.  
22 scheduling of values-based activities and targeting avoidance behaviours). Psychoeducation  
23 and sleep hygiene were added to the BA protocol. An overview of the treatment content is  
24 presented in **Table 1** and example screenshots from the intervention are presented in  
25 supplementary **Figure S1**.  
26  
27  
28  
29  
30  
31  
32  
33

34 In the therapist-guided I-BA arm, participants had regular asynchronous contact with a  
35 clinical psychologist via the platform. The therapist provided feedback, answered questions,  
36 and prompted the participant to complete the next chapter if required. The content of the self-  
37 guided I-BA programme was identical to the therapist-guided version, except for the therapist  
38 support. Both conditions of I-BA included a parallel eight-chapters parental course (see **Table**  
39 **1** for an overview of the content), which was accessed through separate login accounts.  
40  
41  
42  
43  
44  
45

46 The control condition was treatment as usual (TAU). Participants randomised to TAU were  
47 referred to their local CAMHS or paediatric primary care services and were free to receive  
48 any treatment, either psychosocial, pharmacological or the combination of both.  
49  
50  
51  
52  
53  
54  
55  
56  
57  
58  
59  
60

**Table 1.** An overview of the treatment content of I-BA.

| Chapter                                                                                    | Adolescent                                                                                                                                                                                              | Parent                                                                                                                                                                                                                                                                    |
|--------------------------------------------------------------------------------------------|---------------------------------------------------------------------------------------------------------------------------------------------------------------------------------------------------------|---------------------------------------------------------------------------------------------------------------------------------------------------------------------------------------------------------------------------------------------------------------------------|
| 1                                                                                          | Introduction to I-BA. Psychoeducation on depression. Rationale for BA. <i>Homework:</i> activity monitoring.                                                                                            | Introduction to I-BA. Psychoeducation on depression. Rationale for BA. Learn about common parental traps. <i>Homework:</i> notice one's parental behaviours when the adolescent shows depressive behaviours. Discuss with the adolescent how to collaborate in treatment. |
| 2                                                                                          | Values assessment. Set treatment goals. <i>Homework:</i> activity scheduling.                                                                                                                           | Facilitate and encourage values-based activation; communication skills I: validate your child's feelings. <i>Homework:</i> practise validating others' and your child's emotions, encourage values-based activation.                                                      |
| 3                                                                                          | Continued values-based activation. Psychoeducation on sleep. <i>Homework:</i> activity scheduling and sleep hygiene.                                                                                    | Spending positive time with your adolescent. <i>Homework:</i> suggest positive time with your adolescent.                                                                                                                                                                 |
| 4                                                                                          | Continued values-based activation. Overcome barriers to activation through identifying and overcoming avoidance. <i>Homework:</i> activity scheduling, sleep hygiene and practise overcoming avoidance. | Communication skills II: How to avoid and manage conflicts. <i>Homework:</i> practise conflict management.                                                                                                                                                                |
| 5                                                                                          | Continued values-based activation. Overcome barriers to activation through shifting focus to the present situation. <i>Homework:</i> activity scheduling, sleep hygiene and practise shifting focus.    | Take care of yourself as a parent supporting a child with depression. <i>Homework:</i> take care of yourself.                                                                                                                                                             |
| 6                                                                                          | Continued values-based activation. Problem solving. <i>Homework:</i> activity scheduling, sleep hygiene and practise problem-solving.                                                                   | Collaborative problem-solving. <i>Homework:</i> practise collaborative problem-solving                                                                                                                                                                                    |
| 7                                                                                          | Putting it all together. <i>Homework:</i> activity scheduling.                                                                                                                                          | Putting it all together. <i>Homework:</i> choose two tasks from previously introduced skills.                                                                                                                                                                             |
| 8                                                                                          | Treatment summary. Relapse prevention. Evaluation of the treatment.                                                                                                                                     | Course summary. Relapse prevention. Evaluation of treatment.                                                                                                                                                                                                              |
| Abbreviations: I-BA = Internet-delivered Behavioural Therapy, BA = Behavioural Activation. |                                                                                                                                                                                                         |                                                                                                                                                                                                                                                                           |

## Patient involvement

Three patient representatives, who had previously suffered from depression, were involved in the development of I-BA, providing feedback on language and content, ensuring that the content was inclusive (e.g. LGBTQ), understandable and useful.

## Measures

### Baseline assessment

The Mini-International Neuropsychiatric Interview for Children (MINI-KID)<sup>30</sup> was administered to confirm the primary diagnosis of MDD and to screen for psychiatric comorbidities. Suicide risk assessment was based on all available information collected at the inclusion assessment visit (e.g. suicide ideation and behaviour, past and present suicidal behaviour). To assess recurrent non-suicidal self-injury, the 7-item Deliberate Self Harm Inventory for youths<sup>31</sup> was used. Demographic data was collected at the initial assessment and from parents through a questionnaire administered online.

### Study design feasibility

We evaluated study take-up by calculating the average number of included participants per week. Participant retention is presented in **Figure 1**. The specific contents of TAU were collected from each participant's official medical records and by interviewing the families after the three-month follow-up assessment.

### Acceptability of I-BA

The average number of completed chapters for adolescents and their parents were documented. Adolescents who completed less than half (< 4) of the I-BA-chapters were defined as having discontinued treatment. Treatment credibility was measured with four qualitative questions scored on a 5-point Likert scale at week 3 (total range 4 to 20, with higher values representing higher credibility). Treatment satisfaction was assessed with the Client Satisfaction Questionnaire (CSQ) at post-treatment (adolescent and parent version; total range 8–32, with higher values indicating higher satisfaction)<sup>32</sup>. All adverse events communicated by participants (e.g. via SMS, phone calls, at follow-up visits) were documented by the trial coordinator (RG). Adverse events were also assessed with the Negative Effects Questionnaire, 20 Items (NEQ-20), administered at post-treatment and at three-month follow-up (adolescent and parent version; total range 0–80, with higher values representing more reported adverse events)<sup>33</sup>. Therapist time in the treatment platform was

1  
2  
3 logged automatically, and time spent on phone calls was logged manually by the therapist.  
4  
5 These indicators were combined to a measure of therapist time per family and chapter.  
6  
7

### 8 **Clinical outcomes**

9  
10 The Children's Depression Rating Scale, Revised (CDRS-R, primary measure of clinical  
11 efficacy), is a semi-structured clinical interview used to assess depressive symptom severity  
12 in children (total range 17 to 113, with higher values representing more depressive  
13 symptoms)<sup>34</sup>. All interviews with CDRS-R were audio-recorded.  
14  
15  
16

17  
18 Other clinician-rated measures included the Children's Global Assessment Scale (CGAS)<sup>35</sup>,  
19 Clinical Global Impression Scale – Severity and Improvement (CGI-S and CGI-I)<sup>36</sup>.  
20  
21 Treatment response was defined as a CGI-I rating of 1 or 2 at the three-month follow-up.  
22  
23  
24

25  
26 Adolescent- and parent-rated questionnaires were administered online at pre- and post-  
27 treatment and at three-month follow-up. Depressive symptoms were assessed with the SMFQ,  
28 adolescent and parent version; total range is 0-26, with higher values representing more  
29 symptoms)<sup>37 38</sup>. Impaired functioning due to depression was measured with the Work and  
30 Social Adjustment Scale (WSAS, adolescent and parent version; total range 0 to 40, with  
31 higher values indicating greater impairment)<sup>39</sup>. Anxiety symptoms were assessed by the  
32 anxiety subscales in the Revised Children's Anxiety and Depression Scale – Short version  
33 (RCADS-S, adolescent and parent version; total range 0 to 45, with higher values indicating  
34 worse outcome)<sup>40</sup>. KIDSCREEN-10 Index (adolescent and parent version; total range from  
35 10-50, with higher values indicating better quality of life) was used to measure general health-  
36 related quality of life<sup>41</sup>. Difficulties with sleep were measured by the Insomnia Severity Index  
37 (ISI, adolescent version; total range 0 to 28, with higher values indicating a worse outcome)<sup>42</sup>  
38 and irritability by Affective Reactivity Index (ARI, adolescent version; total range 0 to 12,  
39 with higher values indicating worse outcome)<sup>43</sup>. Both ISI and ARI were administered to  
40 adolescents only. No changes were made to outcomes after the trial commenced.  
41  
42  
43  
44  
45  
46  
47  
48  
49  
50  
51

### 52 **Randomisation and allocation concealment**

53  
54 Block randomisation with five random sets of blocks of three and six, respectively, were  
55 created by an independent clinician using an online service ([www.random.org](http://www.random.org)). Once a  
56 participant was included, the independent clinician opened a sealed opaque envelope  
57 revealing treatment allocation.  
58  
59  
60

1  
2  
3  
4  
5 Post- and three-month follow-up assessments were conducted by four clinical psychologists  
6 masked to treatment allocation. In the event of unmasking, a new assessor re-rated the  
7 recording. Masking integrity was measured at each assessment point by asking masked  
8 assessors to guess each participant's group allocation and indicating the reasons for their  
9 guesses (i.e. totally random guess, due to impression of improvement)<sup>44</sup>.

## 15 **Analytical methods**

17 Data on trial feasibility (i.e. participant retention, uptake, and content of TAU) and data on  
18 acceptability (i.e. adherence, credibility, satisfaction, and adverse events) were analysed using  
19 descriptive statistics.  
20  
21

22  
23  
24 We used linear mixed regression models to estimate within group effects for all continuous  
25 outcome measures. All models included a fixed effect of time and a random intercept for the  
26 participant effect. We followed an intent to treat analysis and used available data from all  
27 included participants. Thus, missing data is handled within the model. Time was treated as a  
28 continuous variable from 0–2 (baseline, post-treatment and three-month follow-up) as there  
29 were three months between each time point. Alpha levels (two-tailed) were set to  $p < 0.05$ .  
30 Within-group effect sizes (Cohen's  $d$ ) were calculated using the accumulated beta-coefficients  
31 (pre to three-month follow-up) from the regression models as the nominator and the pooled  
32 SD at pre as the denominator<sup>45</sup>. Additionally, the proportion of treatment responders at three-  
33 month follow-up was calculated with intent to treat analysis according to pre-specified  
34 criteria. Analyses were performed with SPSS version 27 and Excel version 16.  
35  
36  
37  
38  
39  
40  
41  
42  
43  
44

## 45 **Results**

### 47 **Study design feasibility**

#### 49 **Study take-up**

51 A total of 154 families were screened by telephone and 32 participants were included between  
52 14 October 2019 and 24 April 2020. Approximately a fourth had been recommended by a  
53 health care provider to self-refer to the study. The recruitment rate was slow before we started  
54 advertising in local media (0.5 included per week), and then higher after advertising (2.3  
55 included per week).  
56  
57  
58  
59  
60

### Participant retention and study flow

A total of 32 adolescents from all over Sweden were recruited and randomised to therapist-guided I-BA (n = 11), self-guided I-BA (n = 10) or TAU (n = 11). **Table 2** shows the demographic and clinical characteristics of the sample at baseline. **Figure 1** shows the study flow. Two participants dropped out of the study. Both had been allocated to TAU. At post-treatment, there were no missing data on the primary outcome measure CDRS-R in therapist-guided I-BA, one in self-guided and two in TAU. At three-month follow-up, there were missing data for one participant in therapist-guided, three in self-guided and two in TAU. The last 3-month follow-up assessment occurred on the 15<sup>th</sup> of October 2020.

*Figure 1 approximately here.*



**Table 2.** Baseline demographic and clinical characteristics of the total sample and for each group.

|                                       | <b>Total (n = 32)</b> | <b>Therapist-guided I-BA (n = 11)</b> | <b>Self-guided I-BA (n = 10)</b> | <b>TAU (n = 11)</b> |
|---------------------------------------|-----------------------|---------------------------------------|----------------------------------|---------------------|
| Age, mean (SD), min-max               | 15.4 (1.6), 13–17     | 14.6 (1.2), 13–17                     | 15.1 (1.8), 13–17                | 16.5 (1.3), 14–17   |
| Gender, n (%)                         |                       |                                       |                                  |                     |
| Female                                | 19 (59%)              | 6 (55%)                               | 7 (70%)                          | 6 (55%)             |
| Male                                  | 13 (41%)              | 5 (45%)                               | 3 (30%)                          | 5 (45%)             |
| Main contact person, mothers, n (%)   | 30 (94%)              | 9 (82%)                               | 10 (100%)                        | 11 (100%)           |
| Education of contact person           |                       |                                       |                                  |                     |
| Elementary school                     | 1 (3%)                | 0 (0%)                                | 0 (0%)                           | 1 (3%)              |
| High school                           | 3 (9%)                | 1 (9%)                                | 1 (10%)                          | 1 (9%)              |
| Higher education < 2 years            | 5 (16%)               | 1 (9%)                                | 4 (40%)                          | 0 (0%)              |
| Higher education > 2 years            | 21 (66%)              | 7 (64%)                               | 5 (50%)                          | 9 (82%)             |
| Post graduate degree                  | 2 (6%)                | 2 (18%)                               | 0 (0%)                           | 0 (0%)              |
| Comorbidity <sup>1</sup> , n (%)      |                       |                                       |                                  |                     |
| None                                  | 6 (19%)               | 1 (9%)                                | 2 (20%)                          | 3 (27%)             |
| One diagnosis                         | 12 (38%)              | 5 (45%)                               | 3 (30%)                          | 4 (36%)             |
| Two or more diagnoses                 | 14 (44%)              | 5 (45%)                               | 5 (45%)                          | 4 (36%)             |
| Anxiety disorder/s <sup>1</sup>       | 23 (72%)              | 7 (64%)                               | 8 (80%)                          | 8 (73%)             |
| ADHD/ASD                              | 5 (16%)               | 3 (27%)                               | 0 (0%)                           | 2 (18%)             |
| Current use of antidepressants, n (%) | 2 (6%)                | 1 (9%)                                | 0 (0%)                           | 1 (3%)              |
| Risk for suicide <sup>2</sup>         |                       |                                       |                                  |                     |
| No suicidal ideation                  | 3 (9%)                | 1 (9%)                                | 0 (0%)                           | 2 (18%)             |
| Low risk                              | 16 (50%)              | 6 (55%)                               | 4 (40%)                          | 6 (55%)             |
| Moderate risk                         | 13 (41%)              | 4 (36%)                               | 6 (60%)                          | 3 (27%)             |
| High risk                             | 0 (0%)                | 0 (0%)                                | 0 (0%)                           | 0 (0%)              |

<sup>1</sup>Including all anxiety disorders in MINI-KID. <sup>2</sup>According to the definitions of suicidality used in MINI-KID. Abbreviations: ADHD, Attention-deficit/hyperactivity disorder; ASD, Autism spectrum disorder.

## Treatment content in TAU

Five of the referrals were sent to primary care and six to CAMHS. Two participants in TAU never attended their first visits at the clinic to which they were referred. Five out of 11 participants allocated to TAU had started an intervention by post-assessment. This number had increased to nine at the three-month follow-up. According to interviews with families and medical records at the three-month follow-up, patients in TAU received pharmacological, psychological, supportive, or a combination of either of these interventions as well as psychiatric or neuropsychiatric assessment during the study. Details on TAU content are presented in supplementary **Table S1a-b**.

## Acceptability of I-BA

### Treatment adherence

The average number of completed chapters at post-treatment was 7.5 (SD 1.0) for adolescents, and 7.4 (SD 1.3) for parents in therapist-guided I-BA, and 5.4 (SD 2.5) for adolescents and 5.9 (SD 2.8) for parents in self-guided I-BA. Eight adolescents (73%) and eight parents (73%) in therapist-guided I-BA, and three adolescents (30%) and four parents (40%) in self-guided I-BA had completed all 8 chapters by the end of treatment. No participant in therapist-guided I-BA, and three in self-guided I-BA, discontinued treatment.

### Credibility and satisfaction

Average treatment credibility was 14.3 (SD 2.7) for therapist-guided I-BA ( $n = 11$ ), 14.1 (SD 3.9) for self-guided I-BA ( $n = 9$ ) and 11.1 (SD 3.4) for TAU ( $n = 8$ ). Average treatment satisfaction at post-treatment was 24.7 (SD 5.33) for therapist-guided I-BA ( $n = 11$ ), 21.3 (SD 6.8) for self-guided I-BA ( $n = 9$ ) and 17.7 (SD 6.3) for TAU ( $n = 10$ ).

### Adverse events and negative effects

From baseline to three-month follow-up 17 adverse events were documented for therapist-guided and self-guided I-BA, respectively, and 25 for TAU. None of the adverse events were assessed as serious. The most commonly reported negative effect on NEQ in the I-BA-groups, reported by a total of five participants from both groups, was not trusting the treatment and not feeling that the treatment produced any results. In TAU, the most commonly reported negative effects on NEQ were feeling that the treatment did not produce any results, feeling that the treatment was not motivating and not always understanding the treatment.

### Therapist time (therapist-guided I-BA)

The average therapist time per family and chapter was 23 minutes (SD = 6 minutes). This includes both messages in the platform and occasional telephone calls relating to the treatment. Average telephone time per participant was 3.6 min (SD = 7.1), and median 0.0 min (IQR: 6.0 min) throughout the treatment.

## Clinical outcomes

### Primary outcome measure

A series of linear mixed models showed a significant decrease in masked assessor-rated depressive symptoms (CDRS-R) over time for therapist-guided I-BA ( $B = -11.3$ ,  $P < 0.001$ , 95% CI  $-14.9$  to  $-7.7$ ), and self-guided I-BA ( $B = -10.38$ ,  $P < 0.001$ , 95% CI  $-13.93$  to  $-6.82$ ), but not for TAU ( $B = -4.40$ ,  $P = 0.077$ , 95% CI  $-9.33$  to  $0.52$ ,  $P > 0.05$ ) (**Table 3** and **Figure 2**). Within group Cohen's  $d$  was 2.43 (CI 1.66 to 3.20) for therapist-guided I-BA, 2.23 (CI 1.47 to 3.00) for self-guided I-BA, and 0.95 (CI  $-0.11$  to 2.01) for TAU.

**Table 3.** Means (SD) for the three assessment points, presented separately for the three groups.

| Measure                                                                                                                                                                                                                                                  | Therapist-guided I-BA<br>(n = 11) | Self-guided I-BA<br>(n = 10) | TAU<br>(n = 11) |
|----------------------------------------------------------------------------------------------------------------------------------------------------------------------------------------------------------------------------------------------------------|-----------------------------------|------------------------------|-----------------|
| <i>Clinician-rated</i>                                                                                                                                                                                                                                   | Mean (SD) <sup>1</sup>            | Mean (SD)                    | Mean (SD)       |
| CDRS-R                                                                                                                                                                                                                                                   |                                   |                              |                 |
| Pretreatment                                                                                                                                                                                                                                             | 52.2 (9.4)                        | 55.1 (10.2)                  | 53.2 (9.0)      |
| Posttreatment                                                                                                                                                                                                                                            | 34.8 (10.1)                       | 39.0 (12.0)                  | 44.9 (10.0)     |
| Three-month follow-up <sup>2</sup>                                                                                                                                                                                                                       | 29.1 (10.1)                       | 31.6 (11.0)                  | 44.6 (13.6)     |
| <i>Child- and parent-rated</i>                                                                                                                                                                                                                           |                                   |                              |                 |
| SMFQ-A                                                                                                                                                                                                                                                   |                                   |                              |                 |
| Pretreatment                                                                                                                                                                                                                                             | 13.6 (5.4)                        | 13.9 (6.5)                   | 16.8 (6.2)      |
| Posttreatment                                                                                                                                                                                                                                            | 6.2 (5.6)                         | 4.9 (5.5)                    | 12.9 (7.8)      |
| Three-month follow-up                                                                                                                                                                                                                                    | 4.6 (4.5)                         | 8.3 (6.0)                    | 9.6 (5.8)       |
| SMFQ-P                                                                                                                                                                                                                                                   |                                   |                              |                 |
| Pretreatment                                                                                                                                                                                                                                             | 11.6 (5.8)                        | 12.5 (5.9)                   | 15.2 (4.1)      |
| Posttreatment                                                                                                                                                                                                                                            | 7.6 (5.0)                         | 5.5 (4.7)                    | 11.2 (7.2)      |
| Three-month follow-up                                                                                                                                                                                                                                    | 5.7 (4.3)                         | 5.0 (3.6)                    | 9.3 (5.0)       |
| WSAS-A                                                                                                                                                                                                                                                   |                                   |                              |                 |
| Pretreatment                                                                                                                                                                                                                                             | 17.9 (8.7)                        | 13.8 (7.0)                   | 16.1 (5.5)      |
| Posttreatment                                                                                                                                                                                                                                            | 12.0 (6.6)                        | 9.7 (11.2)                   | 15.8 (10.6)     |
| Three-month follow-up                                                                                                                                                                                                                                    | 7.0 (5.4)                         | 5.6 (7.9)                    | 12.9 (10.0)     |
| Abbreviations: TAU = Treatment as usual; CDRS-R = Children's Depression Rating Scale, Revised; SMFQ-A/P = Short version of Mood and Feeling Questionnaire, adolescent and parent version; WSAS-A = Work and Social Adjustment Scale – adolescent Version |                                   |                              |                 |
| <sup>1</sup> Observed means.                                                                                                                                                                                                                             |                                   |                              |                 |
| <sup>2</sup> Primary endpoint.                                                                                                                                                                                                                           |                                   |                              |                 |

Figure 2 approximately here.

### Secondary outcome measures

Descriptive statistics on secondary outcome measures are reported in **Table 3** and supplementary **Table S2**. A series of linear mixed models showed significant decreases in self-rated depressive symptoms (SMFQ-A) for all three groups: therapist-guided I-BA ( $B = -4.4$ ,  $P < 0.001$ , 95% CI  $-6.2$  to  $-2.6$ ), self-guided I-BA ( $B = -3.39$ ,  $P < 0.05$ , 95% CI  $-6.48$  to  $-0.30$ ), and TAU ( $B = -4.04$ ,  $P = 0.001$ , 95% CI  $-6.22$  to  $-1.86$ ). Within group effect sizes (Cohen's  $d$ ) were 1.45 for therapist-guided I-BA, 1.12 for self-guided I-BA and 1.34 for TAU.

1  
2  
3  
4  
5 Significant decreases were shown for self-rated impaired functioning (WSAS-A) for  
6 therapist-guided I-BA ( $B = -5.24$ ,  $P < 0.001$ , 95% CI  $-7.65$  to  $-2.82$ ), and self-guided I-BA  
7 ( $B = -3.58$ ,  $P < 0.01$ , 95% CI  $-6.08$  to  $-1.10$ ), but not for TAU ( $B = -1.81$ ,  $P = 0.163$ , 95%  
8 CI  $-4.43$  to  $0.80$ ). Within group Cohen's  $d$  was 1.47 for therapist-guided I-BA, 1.00 for self-  
9 guided I-BA, and 0.51 for TAU.  
10  
11  
12  
13  
14

15 Significant decreases were shown for parent-rated depressive symptoms (SMFQ-P) for  
16 therapist-guided I-BA ( $B = -2.83$ ,  $P < 0.01$ , 95% CI  $-4.31$  to  $-1.34$ ), self-guided I-BA ( $B$   
17  $= -3.75$ ,  $P < 0.01$ , 95% CI  $-5.65$  to  $-1.85$ ), and for TAU ( $B = -3.29$ ,  $P < 0.01$ , 95% CI  $-5.17$   
18 to  $-1.42$ ). Within group Cohen's  $d$  was 1.05 for therapist-guided I-BA, 1.40 for self-guided I-  
19 BA, and 1.22 for TAU. Means and within-group effects for CGAS, CGI-S, RCADS-S-A/P,  
20 KIDSCREEN-10-A/P, ISI, ARI and WSAS-P are presented in supplementary **Table S3**.  
21  
22  
23  
24  
25  
26  
27

### 28 **Treatment response (CGI-I)**

29 At the primary endpoint, seven participants (64%) in therapist-guided BA, six participants  
30 (60%) in self-guided BA, and four in TAU (36%) were classified as treatment responders  
31 according to the CGI-I.  
32  
33  
34  
35

### 36 **Masking integrity**

37 Masking was unintentionally broken at two follow-up assessments (one in therapist-guided at  
38 post and one in TAU at three-month follow-up). At posttreatment, the assessors' guesses were  
39 correct in 48.2 % of the occasions, and at three-month follow-up the corresponding proportion  
40 was 61.5 %.  
41  
42  
43  
44  
45  
46  
47

### 48 **Discussion**

49 This feasibility trial, where adolescents with mild to moderate depression were randomized to  
50 therapist-guided I-BA, self-guided I-BA or TAU, evaluated the feasibility of the study design,  
51 the acceptability of the treatment arms and provided preliminary clinical efficacy data. The  
52 pace of recruitment was initially slow but improved substantially when we placed  
53 advertisements in local media. It was possible to successfully refer all participants randomised  
54 to TAU to their local primary care or child adolescent mental health services, and all but one  
55  
56  
57  
58  
59  
60

1  
2  
3 patient received treatment in these services, though the start of treatment was often delayed.  
4 As expected, TAU was a heterogeneous condition; participants received pharmacological,  
5 psychological or combination of both interventions. Implications for a future large scale RCT  
6 include the need of a combination of recruitment sources, nationwide participant inclusion  
7 and that TAU is a reasonable and ethically acceptable control condition.  
8  
9  
10  
11  
12

13 Overall, both I-BA groups were rated as more credible and more satisfactory than TAU.  
14 However, most families had probably hoped for one of the I-BA groups, which could have  
15 affected the lower ratings in the TAU group. Adherence was lower in the self-guided I-BA  
16 group but clinical outcomes were overall similar. Whether self-guided I-BA is a viable  
17 treatment alternative will be answered in a larger RCT. The advantages of self-guided  
18 interventions are obvious in terms of small costs and scalability.  
19  
20  
21  
22  
23  
24

25 Previous research has indicated that ICBT is efficacious for adolescent depression<sup>22 23</sup>. To the  
26 best of our knowledge, this is the first trial on online-delivered BA for this age group. Our  
27 results suggest that delivering BA online, with or without therapist-support, could also be a  
28 feasible and potentially effective way of treating depression in adolescents. We found large  
29 within-group effects on clinician-rated depressive symptoms for both I-BA groups. These  
30 results are consistent with previous trials, where face-to-face BA has been found to be  
31 potentially effective for adolescent depression<sup>13-15</sup>. In a small RCT, similar results were found  
32 for face-to-face BA and evidence-based practice for depression<sup>46</sup>, while in the current trial we  
33 found lower effect sizes and response rates in the TAU group. The encouraging results of this  
34 feasibility study should be considered preliminary and the relative efficacy of therapist-guided  
35 and self-guided I-BA will need to be established in a definitive RCT.  
36  
37  
38  
39  
40  
41  
42  
43  
44  
45

46 This trial has several strengths, including a randomised controlled design, the use of masked  
47 assessors, high treatment adherence in the I-BA-groups, the use of an active control group and  
48 the careful recording of adverse events. Further, the contents of TAU were carefully assessed  
49 and reported. This study also has some limitations. First, while TAU ensures patient safety  
50 and allows for comparison to current clinical practice, it is a heterogeneous condition<sup>47</sup>. The  
51 nature and quality of TAU will impact the effect size of the I-BA<sup>48</sup>. Thus, a detailed  
52 description of TAU is important, for interpretation of the results, as well as for enabling  
53 replication. In this study we collected information about the content of TAU through medical  
54 records and interviewing parents. Both methods are subject to uncertainty, but showed good  
55  
56  
57  
58  
59  
60

1  
2  
3 agreement with each other. Second, generalisability of the results to other settings and  
4 locations might be limited. Usual care for adolescents with depression might differ between  
5 regions within Sweden and between different countries and healthcare systems. Third,  
6 although clinic referrals were accepted in this trial, all included patients were self-referred,  
7 and thus may be less complex than a clinically referred sample and more motivated to ICBT.  
8 However, about a fourth of participants self-referred to the study upon recommendation by a  
9 health care provider, and all included patients were diagnosed with major depressive disorder.  
10 Fourth, despite our best efforts, masked assessors correctly guessed group allocation more  
11 often than chance. Additional measures to improve masking, such as employing external  
12 masked assessors who are fully unaware of study aims and hypotheses<sup>49</sup> would have been  
13 preferable.  
14  
15  
16  
17  
18  
19  
20  
21  
22  
23

## 24 **Conclusions**

25  
26 In conclusion, it should be feasible to conduct a fully powered RCT comparing therapist-  
27 guided and self-guided I-BA with TAU, in order to evaluate their relative efficacy and cost-  
28 effectiveness in adolescents with mild to moderate depression.  
29  
30  
31  
32  
33  
34  
35  
36  
37  
38  
39  
40  
41  
42  
43  
44  
45  
46  
47  
48  
49  
50  
51  
52  
53  
54  
55  
56  
57  
58  
59  
60

## Author statements

### Contributors

Authors JA, DMC, FL, EH, ES, and SV designed the study. RG wrote the protocol, was the project manager, and produced the treatment content, with input from JA, ES and SV. RG, JA and SV provided the I-BA treatments. Authors RG undertook the statistical analyses, with input from JA. Author RG also wrote the first draft of the manuscript, in collaboration with SV. All authors contributed to and have approved the final manuscript.

### Funding

This work was supported by the Kavli Trust [grant number 4-3124, 2018]; and the Frimurare Barnhuset Trust in Stockholm [2019]. The funding sources had no involvement in study design; the collection, analysis and interpretation of data; in the writing of the report; or in the decision to submit the article for publication.

### Competing interests

The authors declare no financial or personal interests that could have influenced the work reported in this paper. Prof Mataix-Cols reports personal fees from UpToDate, Inc, outside the submitted work

### Patient consent for publication

Not required.

### Ethics approval

The study protocol was approved by the Regional Ethical Review Board in Stockholm, Sweden (reference number 2019/03235).

### Data sharing statement

The data are pseudonymised according to national (Swedish) and European Union legislation, and cannot be anonymised and published in an open repository.

Participants in the trial have not consented for their data to be shared with other international researchers for research purposes.



## Acknowledgements

The authors would like to thank all adolescents and their parents who participated in this study. Thanks also to psychology student Emilia Serlachius, and to a former patient to author RG for their valuable input on I-BA treatments. Thanks to colleague Vera Wachtmeister for careful proofreading of the treatment content. The authors are also grateful to all clinicians for assisting with assessments and data collection, and to Nicholas Basily from Semantix who carefully read and provided proofreading of this manuscript. This work used services from the eHealth Core Facility at Karolinska Institutet, which is supported by the Strategic Research Area Healthcare Science (SFO-V).

## References

1. Gore FM, Bloem PJN, Patton GC. Global burden of disease in young people aged 10-24 years: a systematic analysis (vol 377, pg 2093, 2011). *Lancet* 2011;378(9790):486-86.
2. Costello EJ, Egger H, Angold A. 10-year research update review: The epidemiology of child and adolescent psychiatric disorders: I. Methods and public health burden. *Journal of the American Academy of Child and Adolescent Psychiatry* 2005;44(10):972-86. doi: 10.1097/01.chi.0000172552.41596.6f
3. Kessler RC. The Costs of Depression. *Psychiatr Clin North Am* 2012;35(1):1-14. doi: 10.1016/j.psc.2011.11.005
4. Jonsson U, Bohman H, Hjern A, et al. Subsequent higher education after adolescent depression: A 15-year follow-up register study. *Eur Psychiatry* 2010;25(7):396-401. doi: 10.1016/j.eurpsy.2010.01.016
5. Jonsson U, Bohman H, Von Knorring L, et al. Mental health outcome of long-term and episodic adolescent depression: 15-year follow-up of a community sample. *Journal of Affective Disorders* 2011;130(3):395-404. doi: 10.1016/j.jad.2010.10.046
6. Lewinsohn PM, Rohde P, Klein DN, et al. Natural course of adolescent major depressive disorder: I. Continuity into young adulthood. *Journal of the American Academy of Child & Adolescent Psychiatry* 1999;38:56-63.
7. Weissman MM, Wolk S, Goldstein RB, et al. Depressed Adolescents Grown Up. *JAMA* 1999;281(18):1707-13. doi: 10.1001/jama.281.18.1707
8. Neufeld SAS, Dunn VJ, Jones PB, et al. Reduction in adolescent depression after contact with mental health services: a longitudinal cohort study in the UK. *The Lancet Psychiatry* 2017;4(2):120-27. doi: 10.1016/s2215-0366(17)30002-0
9. Weersing VR, Jeffreys M, Do M-CT, et al. Evidence Base Update of Psychosocial Treatments for Child and Adolescent Depression. *Journal of Clinical Child & Adolescent Psychology* 2017;46(1):11-43. doi: 10.1080/15374416.2016.1220310
10. Socialstyrelsen. National guidelines for depression and anxiety disorder care. Stockholm: The Swedish National Board of Health and Welfare, 2017.
11. Hopkins K, Crosland P, Elliott N, et al. Diagnosis and management of depression in children and young people: summary of updated NICE guidance. *BMJ : British Medical Journal* 2015;350(mar04 9):h824-h24. doi: 10.1136/bmj.h824
12. Ritschel LA, Ramirez CL, Jones M, et al. Behavioral Activation for Depressed Teens: A Pilot Study. *Cognitive and Behavioral Practice* 2011;18(2):281-99. doi: <https://doi.org/10.1016/j.cbpra.2010.07.002>
13. Ritschel LA, Ramirez CL, Cooley JL, et al. Behavioral Activation for Major Depression in Adolescents: Results From a Pilot Study. *Clinical psychology (New York, NY)* 2016;23(1):39-57. doi: 10.1111/cpsp.12140 [published Online First: Clin Psychol Sci Prac 23: 39-57, 2016]
14. McCauley E, Gudmundsen G, Schloredt K, et al. The Adolescent Behavioral Activation Program: Adapting Behavioral Activation as a Treatment for Depression in Adolescence. *Journal of Clinical Child & Adolescent Psychology* 2016;45(3):1-14. doi: 10.1080/15374416.2014.979933
15. Pass L, Lejuez CW, Reynolds S. Brief Behavioural Activation (Brief BA) for Adolescent Depression: A Pilot Study. *Behav Cogn Psychother* 2018;46(2):182-94. doi: 10.1017/S1352465817000443 [published Online First: 2017/08/02]
16. Dimidjian S, Hollon SD, Dobson KS, et al. Randomized Trial of Behavioral Activation, Cognitive Therapy, and Antidepressant Medication in the Acute Treatment of Adults with Major Depression. *J Consult Clin Psychol* 2006;74(4):658-70. doi: 10.1037/0022-006X.74.4.658

17. Collins KA, Westra HA, Dozois DJA, et al. Gaps in accessing treatment for anxiety and depression: Challenges for the delivery of care. *Clinical Psychology Review* 2004;24(5):583-616. doi: 10.1016/j.cpr.2004.06.001
18. Merikangas KR, He J-p, Burstein M, et al. Service utilization for lifetime mental disorders in U.S. adolescents: results of the National Comorbidity Survey-Adolescent Supplement (NCS-A). *Journal of the American Academy of Child and Adolescent Psychiatry* 2011;50(1):32-45. doi: 10.1016/j.jaac.2010.10.006 [published Online First: 2010/12/03]
19. Essau CA. Frequency and patterns of mental health services utilization among adolescents with anxiety and depressive disorders. *Depress Anxiety* 2005;22(3):130-37. doi: 10.1002/da.20115
20. Hedman E, Ljótsson B, Lindfors N. Cognitive behavior therapy via the Internet: a systematic review of applications, clinical efficacy and cost-effectiveness. *Expert Rev Pharmacoecon Outcomes Res* 2012;12(6):745-64. doi: 10.1586/erp.12.67
21. Vigerland S, Lenhard F, Bonnert M, et al. Internet-delivered cognitive behavior therapy for children and adolescents: A systematic review and meta-analysis. *Clin Psychol Rev* 2016;50:1-10. doi: 10.1016/j.cpr.2016.09.005 [published Online First: 2016/09/27]
22. Topooco N, Berg M, Johansson S, et al. Chat- and internet-based cognitive-behavioural therapy in treatment of adolescent depression: randomised controlled trial. *Bjpsych Open* 2018;4(4):199-207. doi: 10.1192/bjo.2018.18
23. Topooco N, Byléhn S, Dahlström Nysäter E, et al. Evaluating the Efficacy of Internet-Delivered Cognitive Behavioral Therapy Blended With Synchronous Chat Sessions to Treat Adolescent Depression: Randomized Controlled Trial. *J Med Internet Res* 2019;21(11):e13393-e93. doi: 10.2196/13393
24. Makarushka MM. Efficacy of an Internet-based intervention targeted to adolescents with subthreshold depression. University of Oregon, 2011.
25. Sethi S, Campbell AJ, Ellis LA. The Use of Computerized Self-Help Packages to Treat Adolescent Depression and Anxiety. *Journal of Technology in Human Services* 2010;28(3):144-60. doi: 10.1080/15228835.2010.508317
26. Pennant ME, Loucas CE, Whittington C, et al. Computerised therapies for anxiety and depression in children and young people: A systematic review and meta-analysis. *Behaviour research and therapy* 2015;67:1-18. doi: 10.1016/j.brat.2015.01.009
27. Bennett SD, Cuijpers P, Ebert DD, et al. Practitioner Review: Unguided and guided self-help interventions for common mental health disorders in children and adolescents: a systematic review and meta-analysis. *Journal of child psychology and psychiatry* 2019;60(8):828-47. doi: 10.1111/jcpp.13010
28. Diagnostic and statistical manual of mental disorders: DSM-5. Fifth edition ed. Washington, DC: American Psychiatric Publishing 2013.
29. Arjadi R, Nauta MH, Scholte WF, et al. Guided Act and Feel Indonesia (GAF-ID) - Internet-based behavioral activation intervention for depression in Indonesia: study protocol for a randomized controlled trial.(Report). *Trials* 2016;17(1) doi: 10.1186/s13063-016-1577-9
30. Sheehan DV, Sheehan KH, Shytle RD, et al. Reliability and Validity of the Mini International Neuropsychiatric Interview for Children and Adolescents (MINI-KID). *The Journal of Clinical Psychiatry* 2010;71(03):313-26. doi: 10.4088/JCP.09m05305whi
31. Gratz K. Measurement of Deliberate Self-Harm: Preliminary Data on the Deliberate Self-Harm Inventory. *Journal of Psychopathology and Behavioral Assessment* 2001;23(4):253-63. doi: 10.1023/A:1012779403943

- 1
  - 2
  - 3
  - 4
  - 5
  - 6
  - 7
  - 8
  - 9
  - 10
  - 11
  - 12
  - 13
  - 14
  - 15
  - 16
  - 17
  - 18
  - 19
  - 20
  - 21
  - 22
  - 23
  - 24
  - 25
  - 26
  - 27
  - 28
  - 29
  - 30
  - 31
  - 32
  - 33
  - 34
  - 35
  - 36
  - 37
  - 38
  - 39
  - 40
  - 41
  - 42
  - 43
  - 44
  - 45
  - 46
  - 47
  - 48
  - 49
  - 50
  - 51
  - 52
  - 53
  - 54
  - 55
  - 56
  - 57
  - 58
  - 59
  - 60
32. Larsen DL, Attkisson CC, Hargreaves WA, et al. Assessment of client/patient satisfaction: Development of a general scale. *Eval Program Plann* 1979;2(3):197-207. doi: 10.1016/0149-7189(79)90094-6
33. Rozental A, Kottorp A, Forsström D, et al. The Negative Effects Questionnaire: psychometric properties of an instrument for assessing negative effects in psychological treatments. *Behav Cogn Psychother* 2019;47(5):559-72. doi: 10.1017/S1352465819000018 [published Online First: 2019/03/15]
34. Poznanski E, Mokros, H. Children's depression rating scale-revised (CDRS-R). Los Angeles, CA: Western Psychological Services 2001.
35. Shaffer D, Gould MS, Brasic J, et al. A Children's Global Assessment Scale (CGAS). *Archives of General Psychiatry* 1983;40(11):1228-31. doi: 10.1001/archpsyc.1983.01790100074010
36. Busner J, Targum SD. The clinical global impressions scale: applying a research tool in clinical practice. *Psychiatry (Edgmont (Pa : Township))* 2007;4(7):28.
37. Angold A, Costello, E. J., Messer, S. C., & Pickles, A. . The development of a short questionnaire for use in epidemiological studies of depression in children and adolescents. *Int J Methods Psychiatr Res* 1995; 5:237 - 49.
38. Jarbin H, Ivarsson T, Andersson M, et al. Screening efficiency of the Mood and Feelings Questionnaire (MFQ) and Short Mood and Feelings Questionnaire (SMFQ) in Swedish help seeking outpatients. *PLoS One* 2020;15(3):e0230623-e23. doi: 10.1371/journal.pone.0230623
39. Jassi A, Lenhard F, Krebs G, et al. The Work and Social Adjustment Scale, Youth and Parent Versions: Psychometric Evaluation of a Brief Measure of Functional Impairment in Young People. *Child Psychiatry Hum Dev* 2020;51(3):453-60. doi: 10.1007/s10578-020-00956-z
40. Ebesutani C, Reise SP, Chorpita BF, et al. The Revised Child Anxiety and Depression Scale-Short Version: scale reduction via exploratory bifactor modeling of the broad anxiety factor. *Psychol Assess* 2012;24(4):833-45. doi: 10.1037/a0027283 [published Online First: 2012/02/15]
41. Ravens-Sieberer U, Erhart M, Rajmil L, et al. Reliability, construct and criterion validity of the KIDSCREEN-10 score: a short measure for children and adolescents' well-being and health-related quality of life. *Qual Life Res* 2010;19(10):1487-500. doi: 10.1007/s11136-010-9706-5
42. Bastien CH, Vallières A, Morin CM. Validation of the Insomnia Severity Index as an outcome measure for insomnia research. *Sleep Med* 2001;2(4):297-307. doi: 10.1016/S1389-9457(00)00065-4
43. Stringaris A, Goodman R, Ferdinando S, et al. The Affective Reactivity Index: A Concise Irritability Scale for Clinical and Research Settings. *Journal of Child Psychology and Psychiatry* 2012;53(11):1109-17. doi: 10.1111/j.1469-7610.2012.02561.x
44. Basoglu M, Marks I, Livanou M, et al. Double-blindness Procedures, Rater Blindness, and Ratings of Outcome: Observations From a Controlled Trial. *Archives of General Psychiatry* 1997;54(8):744-48. doi: 10.1001/archpsyc.1997.01830200078011
45. Feingold A. Effect Sizes for Growth-Modeling Analysis for Controlled Clinical Trials in the Same Metric as for Classical Analysis. *Psychol Methods* 2009;14(1):43-53. doi: 10.1037/a0014699
46. McCauley E, Gudmundsen G, Schloredt K, et al. The Adolescent Behavioral Activation Program: Adapting Behavioral Activation as a Treatment for Depression in Adolescence. *J Clin Child Adolesc Psychol* 2016;45(3):291-304. doi: 10.1080/15374416.2014.979933 [published Online First: 2015/01/21]

- 1  
2  
3 47. Freedland KE, Mohr DC, Davidson KW, et al. Usual and unusual care: existing practice  
4 control groups in randomized controlled trials of behavioral interventions. *Psychosom*  
5 *Med* 2011;73(4):323-35. doi: 10.1097/PSY.0b013e318218e1fb  
6  
7 48. Watts SE, Turnell A, Kladnitski N, et al. Treatment-as-usual (TAU) is anything but usual:  
8 A meta-analysis of CBT versus TAU for anxiety and depression. *Journal of Affective*  
9 *Disorders* 2015;175:152-67. doi: <https://doi.org/10.1016/j.jad.2014.12.025>  
10  
11 49. Mataix-Cols D, Andersson E. Ten Practical Recommendations for Improving Blinding  
12 Integrity and Reporting in Psychotherapy Trials. *JAMA Psychiatry* 2021;78(9):943-44.  
13 doi: 10.1001/jamapsychiatry.2021.1419  
14  
15  
16  
17  
18  
19  
20  
21  
22  
23  
24  
25  
26  
27  
28  
29  
30  
31  
32  
33  
34  
35  
36  
37  
38  
39  
40  
41  
42  
43  
44  
45  
46  
47  
48  
49  
50  
51  
52  
53  
54  
55  
56  
57  
58  
59  
60

For peer review only

Figure 1

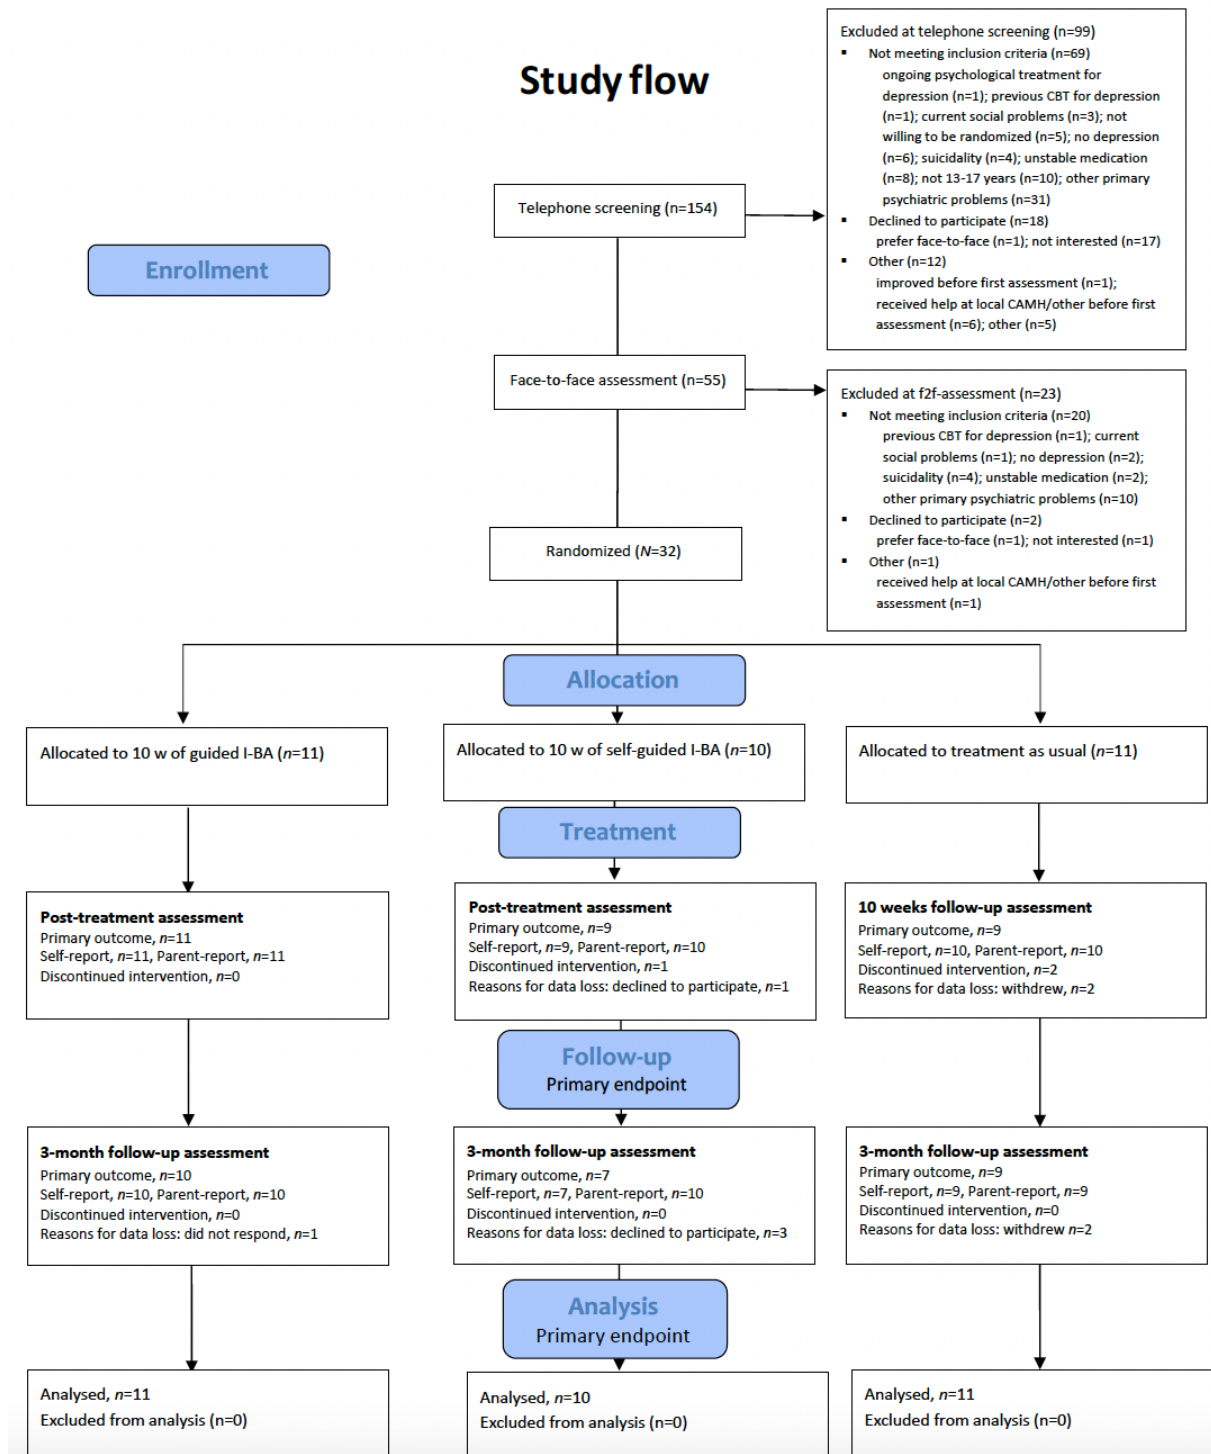

Figure 1 Consolidated Standards of Reporting Trials flow diagram.

Abbreviations: I-BA = Internet-delivered behavioural activation; CDRS-R = Children’s Depression Rating Scale, revised; SMFQ = Short Mood and Feelings Questionnaire.

**Figure 2**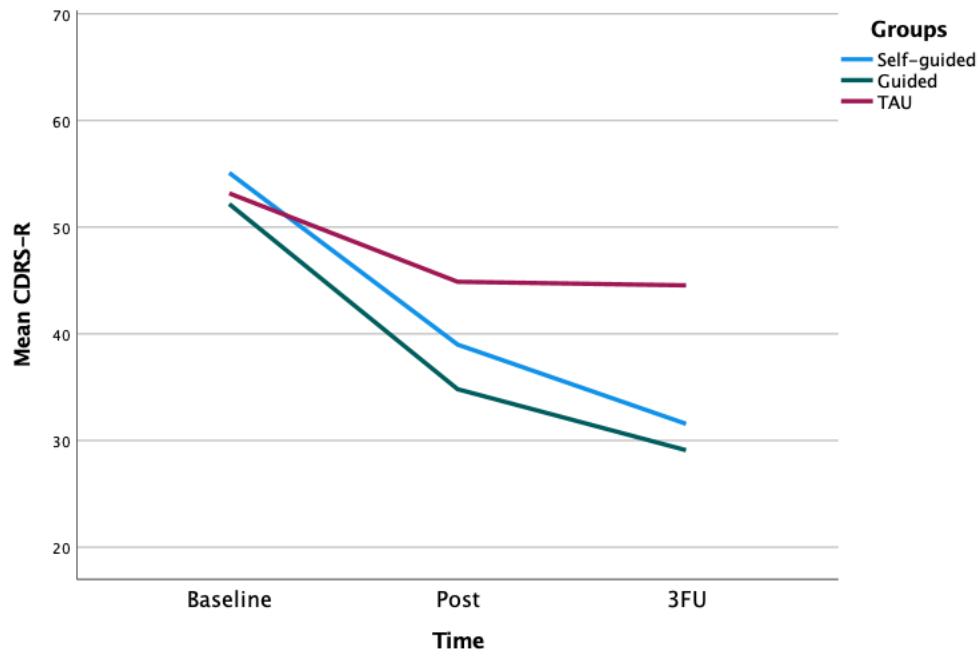

**Figure 2.** Graphical representation of the CDRS-R Total score across the three assessment points. Primary endpoint is the three-month follow-up. Error bars indicate 95% CIs. 3FU, three-month follow-up. CDRS-R, Children's Depression Rating Scale – Revised.

1  
2  
3  
4  
5  
6  
7  
8  
9  
10  
11  
12  
13  
14  
15  
16  
17  
18  
19  
20  
21  
22  
23  
24  
25  
26  
27  
28  
29  
30  
31  
32  
33  
34  
35  
36  
37  
38  
39  
40  
41  
42  
43  
44  
45  
46

**Figure S1.** Screenshots of I-BA treatment

1. To the left: Overview and start page, with list of chapters (BIP Depression). To the right: A psychoeducative video about depression.

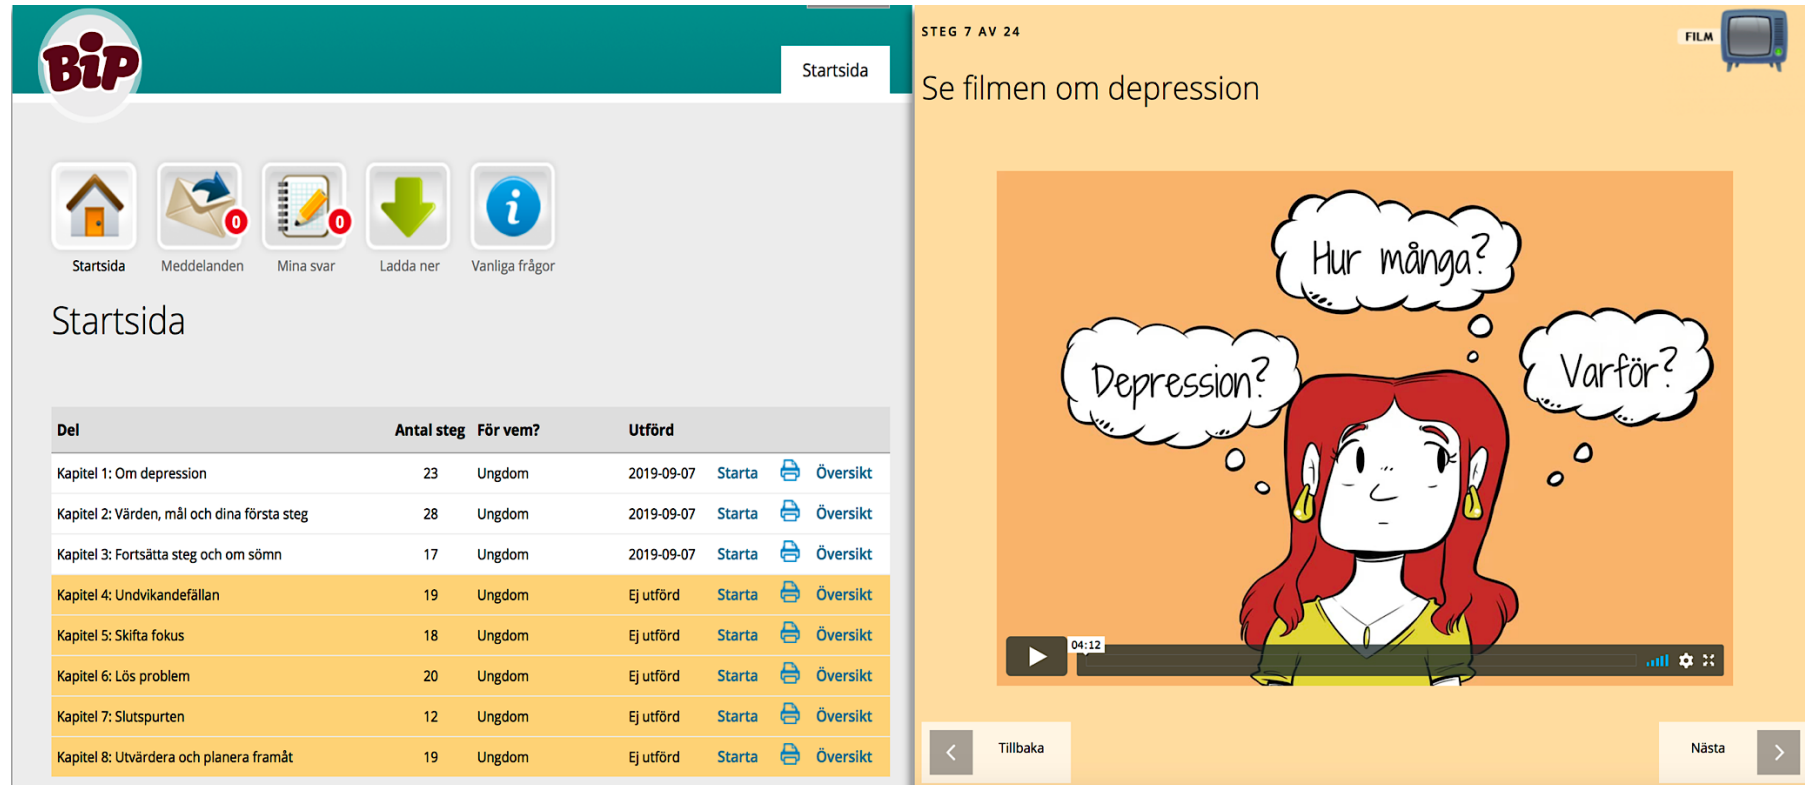

The image shows two side-by-side screenshots from the BIP Depression website. The left screenshot displays the 'Startsida' (Home) page with a navigation menu and a table of chapters. The right screenshot shows a video player titled 'Se filmen om depression' (Watch the film about depression) with a cartoon character and thought bubbles.

**Startsida**

Startsida Meddelanden Mina svar Ladda ner Vanliga frågor

| Del                                         | Antal steg | För vem? | Utförd                                                     |
|---------------------------------------------|------------|----------|------------------------------------------------------------|
| Kapitel 1: Om depression                    | 23         | Ungdom   | 2019-09-07 <a href="#">Starta</a> <a href="#">Översikt</a> |
| Kapitel 2: Värden, mål och dina första steg | 28         | Ungdom   | 2019-09-07 <a href="#">Starta</a> <a href="#">Översikt</a> |
| Kapitel 3: Fortsätta steg och om sömn       | 17         | Ungdom   | 2019-09-07 <a href="#">Starta</a> <a href="#">Översikt</a> |
| Kapitel 4: Undvikandefällan                 | 19         | Ungdom   | Ej utförd <a href="#">Starta</a> <a href="#">Översikt</a>  |
| Kapitel 5: Skifta fokus                     | 18         | Ungdom   | Ej utförd <a href="#">Starta</a> <a href="#">Översikt</a>  |
| Kapitel 6: Lös problem                      | 20         | Ungdom   | Ej utförd <a href="#">Starta</a> <a href="#">Översikt</a>  |
| Kapitel 7: Slutspurten                      | 12         | Ungdom   | Ej utförd <a href="#">Starta</a> <a href="#">Översikt</a>  |
| Kapitel 8: Utvärdera och planera framåt     | 19         | Ungdom   | Ej utförd <a href="#">Starta</a> <a href="#">Översikt</a>  |

STEG 7 AV 24

Se filmen om depression

Hur många?  
Depression?  
Varför?

04:12

Tillbaka Nästa



2. To the left: An exercise about the avoidance trap. To the right: The three fictional characters sharing their treatment goals.

STEG 9 AV 19

### Undvikandefällan - hmm...

Det är alltså väldigt mänskligt att undvika jobbiga situationer och känslor. Och när man är deprimerad är det lätt hänt att undvikandet blir ett mönster. Nu är vi nyfikna på att höra vad du tänker om filmen!



**Spara**

**Det:** Kapitel 4: Undvikandefällan  
**Steg:** Undvikandefällan - hmm...  
**Senast uppdaterad:** 07 Sep 2019 20:13

Kan du känna igen dig i att du ibland hamnar i undvikandefällan? Om ja, på vilket sätt? Om nej, vad är det du inte känner igen?

Vad tror du, hänger undvikande och depression ihop för dig?

**Spara**

Här kan du och din behandlare skicka meddelanden till varandra

Rebecca Grudin

**Skicka**

**BIP**

Kapitel 2: Värden, mål och dina första steg ✕ **Startsida**

STEG 18 AV 28

## Exempel på behandlingsmål

Det är som sagt bra att ha mål med behandlingen i BIP. Målen beskriver vad du vill försöka klara av under behandlingen och vad som är viktigt för dig.

Här kan du se vilka mål Noomi, Amin & Molly har för sina behandlingar!



**Noomi - stressad över skolan, vill inte lasta föräldrarna, ledsen och vilar mycket**

Här är Noomis mål för behandlingen:

- Börja dansa regelbundet igen.
- Träffa kompisar varje helg.
- Plugga på bestämda tider, senast till kl 19 vardagkvällar och inte på helger.

**Tillbaka** **Nästa**

3. To the left: The app that adolescents use for doing home assignments between chapters. To the right: Written information to the caregivers about how to validate your adolescent's emotions.

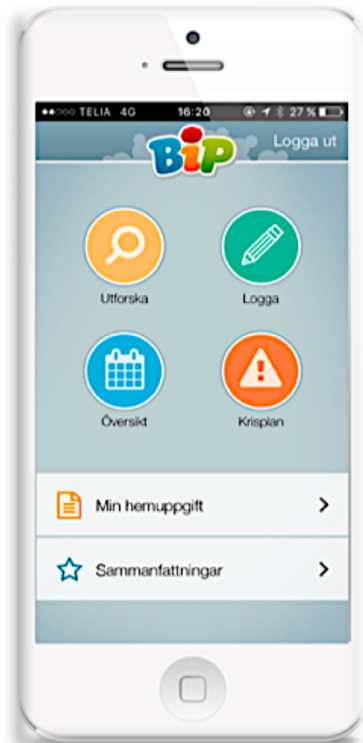

BIP
Startsida

STEG 12 AV 17

## Bekräfta - vad, när, hur?

- Vad? >
- När? >
- Hur? >
- Exempel >
- Bekräfta känslan, inte handlingen** >

Att bekräfta någon betyder inte nödvändigtvis att du gillar eller håller med om vad personen gör (t ex ställer in med kompisar) eller att det hen upplever är sant (t ex "jag är hopplös"). Du bekräftar däremot att den andre känner vad den känner i en viss situation, och att det är begripligt.

Det går ofta att bekräfta känslan utan att samtidigt bekräfta att det är en bra idé att strunta i handlingen.

< Tillbaka
Nästa >

1  
2  
3 4. Encrypted messaging function which is included in guided I-BA. The psychologist responds within 1-2 days on weekdays to messages from  
4 the participant.  
5  
6

7  
8  
9  
10  
11  
12  
13  
14  
15  
16  
17  
18  
19  
20  
21  
22  
23  
24  
25  
26  
27  
28  
29  
30  
31  
32  
33  
34  
35  
36  
37  
38  
39  
40  
41  
42  
43  
44  
45  
46

Inloggad som: bipticdemo [Logga ut](#)

[Startside](#)

[Startside](#) [Meddelanden](#) [Mina svar](#) [Ladda ner](#) [Vanliga frågor](#)

## Meddelanden

[Inkorg](#) [Nytt meddelande](#) [Skickade](#) [Utkast](#)

Behandlare: Per Andrén

Angående:

Skriv meddelande:

[Spara som utkast](#) [Skicka](#)

Barn- och ungdomspsykiatri  
STOCKHOLMS LÄNS LANDSTING

[Om Cookies »](#)

**Table S1a.** TAU content, including details on treatment type, intensity and provider according to interviews with parents

| ID | Medications / Indication                 | No. of visits, incl initial psychiatric assessment | Psychological or psychosocial treatment | No. of sessions                    | Other intervention (no. visits) | Comments                                                                         |
|----|------------------------------------------|----------------------------------------------------|-----------------------------------------|------------------------------------|---------------------------------|----------------------------------------------------------------------------------|
| 1  | Antidepressant (SSRI, 25 mg Sertraline)  | –                                                  | CBT                                     | 5 sessions of CBT                  | –                               |                                                                                  |
| 2  | Antidepressant (SSRI, Fluoxetine, 20 mg) | –                                                  | Supportive therapy                      | 1–2 sessions of supportive therapy | –                               |                                                                                  |
| 3  | –                                        | 2 visits (psychiatric assessment only)             | –                                       | –                                  | –                               | No intervention was offered after the psychiatric assessment due to improvement. |
| 4  | Melatonin                                | –                                                  | CBT                                     | 10 sessions of CBT                 | –                               |                                                                                  |
| 5  | Melatonin + Vitamin D                    | –                                                  | CBT                                     | 7 sessions CBT                     | –                               |                                                                                  |
| 6  | –                                        | –                                                  | Supportive therapy                      | 10 sessions of supportive therapy  | –                               |                                                                                  |
| 7  | Promethazine (Lergigan) + Melatonin      | –                                                  | –                                       | –                                  | Neuropsychiatric assessment     |                                                                                  |
| 8  | –                                        | –                                                  | CBT                                     | 7 sessions                         | –                               |                                                                                  |

1  
2  
3  
4  
5  
6  
7  
8  
9  
10  
11  
12  
13  
14  
15  
16  
17  
18  
19  
20  
21  
22  
23  
24  
25  
26  
27  
28  
29  
30  
31  
32  
33  
34  
35  
36  
37  
38  
39  
40  
41  
42  
43  
44  
45  
46

|   |                                                                              |             |   |   |   |                                                                                                                                                                                                   |
|---|------------------------------------------------------------------------------|-------------|---|---|---|---------------------------------------------------------------------------------------------------------------------------------------------------------------------------------------------------|
| 9 | Antidepressant + sleep medication + antihistamine (unknown types and dosage) | See comment | - | - | - | Initially this participant was referred to the CAMHS and received 1 visit (classified as psychiatric assessment), and later self-referred to primary care and received the specified medications. |
|---|------------------------------------------------------------------------------|-------------|---|---|---|---------------------------------------------------------------------------------------------------------------------------------------------------------------------------------------------------|

For peer review only

**Table S1b.** TAU content, including details on treatment type, intensity and provider according to medical records

| ID | Medications                                                             | No. of visits, incl initial psychiatric assessment | Psychological or psychosocial treatment | No. of sessions   | Other intervention (no. visits) | Target for the intervention/s      | Comments                                                                                                                                                             |
|----|-------------------------------------------------------------------------|----------------------------------------------------|-----------------------------------------|-------------------|---------------------------------|------------------------------------|----------------------------------------------------------------------------------------------------------------------------------------------------------------------|
| 1  | Antidepressant (SSRI, Sertraline, 25 mg x 1)                            | 3 visits                                           | CBT                                     | 5 sessions of CBT | –                               | Social anxiety                     |                                                                                                                                                                      |
| 2  | Antidepressant (SSRI, Fluoxetine 20 mg x 1)                             | 3 visits                                           | PDT/Supportive Therapy                  | 5 sessions of PDT | –                               | Depression and unspecified anxiety | Medical records imply that it was mainly Supportive therapy, but classified as PDT according to treatment plan.                                                      |
| 3  | –                                                                       | 1 visit (psychiatric assessment only)              | –                                       | –                 | –                               | Depression                         |                                                                                                                                                                      |
| 4  | Hydroxyzine (Atarax, 25 mg x 0,5-1) + Melatonin (Melatonin, 2 mg x 1-3) | –                                                  | CBT/Supportive therapy                  | 8 sessions of CBT | –                               | Depression                         | No visits or telephone calls registered with a psychiatrist. The therapist seems to have consulted the doctor who initiated medical treatment without patient visit. |
| 5  | Melatonin (Melatonin, 4 mg)<br>Vitamin D (Benferol, 800ie)              | 1 visit                                            | CBT                                     | 11 sessions       | –                               | Depression                         |                                                                                                                                                                      |
| 6  | –                                                                       | –                                                  | Supportive therapy                      | 10 sessions       | –                               | Depression                         |                                                                                                                                                                      |

1  
2  
3  
4  
5  
6  
7  
8  
9  
10  
11  
12  
13  
14  
15  
16  
17  
18  
19  
20  
21  
22  
23  
24  
25  
26  
27  
28  
29  
30  
31  
32  
33  
34  
35  
36  
37  
38  
39  
40  
41  
42  
43  
44  
45  
46

|   |                                                                              |                                       |     |          |                                                              |                                                                                                         |                                                                                                                                   |
|---|------------------------------------------------------------------------------|---------------------------------------|-----|----------|--------------------------------------------------------------|---------------------------------------------------------------------------------------------------------|-----------------------------------------------------------------------------------------------------------------------------------|
| 7 | Promethazine (Lergigan, 25 mg as required) + Melatonin (Melatonin, 3 mg x 3) | 1 visit and 1 telephone call          | –   | –        | Neuropsychiatric assessment, 5 visits plus 3 telephone calls | Melatonin for sleep problems, and Lergigan for unspecified anxiety; Suspected neuropsychiatric symptoms |                                                                                                                                   |
| 8 | –                                                                            | –                                     | CBT | 8 visits | –                                                            | Depression                                                                                              |                                                                                                                                   |
| 9 | –                                                                            | 1 visit (psychiatric assessment only) | –   | –        | –                                                            | Depression                                                                                              | Psychiatric assessment included brief psychoeducation, then a referral was sent to primary care since the patient turned 18 years |

**Table S2.** Means (SD) for all measures at the three assessment points for the three groups in the study.

| <b>Group</b>                  | <b>Guided I-BA<br/>(n=11)</b> | <b>Self-guided I-BA<br/>(n=10)</b> | <b>TAU<br/>(n=11)</b> |
|-------------------------------|-------------------------------|------------------------------------|-----------------------|
| <b>Measure</b>                |                               |                                    |                       |
| <b><i>Clinician-rated</i></b> |                               |                                    |                       |
| <b>CGAS</b>                   |                               |                                    |                       |
| Baseline                      | 56.6 (4.2)                    | 54.7 (6.4)                         | 52.9 (6.4)            |
| Post                          | 66.1 (13.3)                   | 60.6 (11.5)                        | 59.6 (7.8)            |
| 3-month FU                    | 70.6 (15.4)                   | 63.6 (12.5)                        | 64.3 (10.1)           |
| <b>CGI-S</b>                  |                               |                                    |                       |
| Baseline                      | 3.5 (0.8)                     | 4.1 (1.1)                          | 3.7 (0.7)             |
| Post                          | 2.2 (1.3)                     | 3.0 (1.4)                          | 3.3 (1.2)             |
| 3-month FU                    | 2.0 (1.5)                     | 2.3 (1.4)                          | 3.0 (1.8)             |
| <b><i>Child-rated</i></b>     |                               |                                    |                       |
| <b>RCADS-S-A</b>              |                               |                                    |                       |
| Baseline                      | 12.5 (4.3)                    | 14.4 (8.8)                         | 12.7 (6.2)            |
| Post                          | 7.9 (5.2)                     | 7.4 (4.6)                          | 15.5 (10.3)           |
| 3-month FU                    | 8.3 (5.3)                     | 10.1 (5.7)                         | 12.3 (9.0)            |
| <b>KIDSCREEN-10-A</b>         |                               |                                    |                       |
| Baseline                      | 31.3 (5.3)                    | 30.7 (4.2)                         | 28.4 (4.2)            |
| Post                          | 34.4 (5.3)                    | 36.0 (6.2)                         | 30.4 (5.2)            |
| 3-month FU                    | 38.0 (5.1)                    | 38.3 (6.0)                         | 33.7 (4.9)            |
| <b>ISI</b>                    |                               |                                    |                       |
| Baseline                      | 12.4 (6.3)                    | 12.3 (6.2)                         | 15.5 (3.5)            |
| Post                          | 6.1 (4.3)                     | 7.6 (5.7)                          | 14.3 (7.9)            |
| 3-month FU                    | 4.3 (3.6)                     | 7.0 (4.4)                          | 10.2 (5.5)            |
| <b>ARI</b>                    |                               |                                    |                       |
| Baseline                      | 3.8 (1.8)                     | 6.6 (4.1)                          | 6.6 (4.1)             |
| Post                          | 3.4 (2.7)                     | 3.9 (4.0)                          | 5.5 (4.2)             |
| 3-month FU                    | 2.3 (1.6)                     | 2.7 (4.4)                          | 4.0 (3.4)             |



|                                                                                                                                                                                                                                                                                                                                                                                                                                                                                                                                                                                                                                                                                                                                      |            |             |            |
|--------------------------------------------------------------------------------------------------------------------------------------------------------------------------------------------------------------------------------------------------------------------------------------------------------------------------------------------------------------------------------------------------------------------------------------------------------------------------------------------------------------------------------------------------------------------------------------------------------------------------------------------------------------------------------------------------------------------------------------|------------|-------------|------------|
| <i>Parent-rated</i>                                                                                                                                                                                                                                                                                                                                                                                                                                                                                                                                                                                                                                                                                                                  |            |             |            |
| <b>WSAS-P</b>                                                                                                                                                                                                                                                                                                                                                                                                                                                                                                                                                                                                                                                                                                                        |            |             |            |
| Baseline                                                                                                                                                                                                                                                                                                                                                                                                                                                                                                                                                                                                                                                                                                                             | 18.5 (8.4) | 16.1 (11.0) | 19.2 (7.9) |
| Post                                                                                                                                                                                                                                                                                                                                                                                                                                                                                                                                                                                                                                                                                                                                 | 13.2 (7.0) | 11.7 (9.6)  | 21.9 (7.9) |
| 3-month follow-up <sup>§</sup>                                                                                                                                                                                                                                                                                                                                                                                                                                                                                                                                                                                                                                                                                                       | 11.6 (9.7) | 13.1 (11.1) | 13.2 (8.9) |
| <b>RCADS-S-P</b>                                                                                                                                                                                                                                                                                                                                                                                                                                                                                                                                                                                                                                                                                                                     |            |             |            |
| Baseline                                                                                                                                                                                                                                                                                                                                                                                                                                                                                                                                                                                                                                                                                                                             | 10.6 (6.6) | 10.3 (4.9)  | 10.4 (7.0) |
| Post                                                                                                                                                                                                                                                                                                                                                                                                                                                                                                                                                                                                                                                                                                                                 | 9.2 (6.4)  | 8.8 (4.1)   | 10.0 (5.3) |
| 3-month FU                                                                                                                                                                                                                                                                                                                                                                                                                                                                                                                                                                                                                                                                                                                           | 7.7 (6.1)  | 6.5 (4.5)   | 7.9 (5.7)  |
| <b>KIDSCREEN-10-P</b>                                                                                                                                                                                                                                                                                                                                                                                                                                                                                                                                                                                                                                                                                                                |            |             |            |
| Baseline                                                                                                                                                                                                                                                                                                                                                                                                                                                                                                                                                                                                                                                                                                                             | 29.6 (4.2) | 30.3 (5.6)  | 28.0 (5.4) |
| Post                                                                                                                                                                                                                                                                                                                                                                                                                                                                                                                                                                                                                                                                                                                                 | 31.5 (3.3) | 34.8 (4.4)  | 31.2 (4.7) |
| 3-month FU                                                                                                                                                                                                                                                                                                                                                                                                                                                                                                                                                                                                                                                                                                                           | 34.2 (3.4) | 33.0 (8.3)  | 31.6 (5.0) |
| <p>I-BA = Internet-delivered behavioural activation; TAU = treatment as usual; CGAS = Children's Global Assessment Scale; CGI-S = Clinical Global Impression – Severity; RCADS-S (A/P) = Revised Children's Anxiety and Depression Scale, short version, anxiety subscales, adolescent and parent version; KIDSCREEN-10 (A/P) = a measure for general health-related quality of life, adolescent and parent version; ISI = Insomnia Severity Index; ARI = Affective Reactivity Index; WSAS (P) = Work and Social Adjustment Scale, parent version</p> <p><sup>^</sup>Observed means.</p> <p><sup>†</sup>Coefficients at post-treatment and at the 3-month follow-up compared with baseline.</p> <p><sup>§</sup>Primary endpoint.</p> |            |             |            |

Table S3. Fixed effects and effect sizes for all measures at follow-up compared to baseline, presented separately for the three groups and types of rater.

| Measure                | Guided I-BA (n=11)                        |                                             | Self-guided I-BA (n=10)                   |                                             | TAU (n=11)                                |                                             |
|------------------------|-------------------------------------------|---------------------------------------------|-------------------------------------------|---------------------------------------------|-------------------------------------------|---------------------------------------------|
|                        | Unstandardized coefficient<br>B (95 % CI) | Effect size (Cohen's <i>d</i> , 95<br>% CI) | Unstandardized coefficient<br>B (95 % CI) | Effect size (Cohen's <i>d</i> , 95<br>% CI) | Unstandardized coefficient<br>B (95 % CI) | Effect size (Cohen's <i>d</i> , 95<br>% CI) |
| <i>Clinician-rated</i> |                                           |                                             |                                           |                                             |                                           |                                             |
| CGI-S                  | -0.69 (-1.12 to -0.26)**                  | 1.57 (0.59 to 2.55)                         | -0.85 (-1.24 to -0.46)***                 | 1.94 (1.05 to 2.83)                         | -0.37 (-0.86 to 0.12)                     | 0.85 (-0.26 to 1.96)                        |
| CGAS                   | 6.86 (2.46 to 11.25)**                    | 2.36 (0.85 to 3.87)                         | 4.35 (1.21 to 7.50)**                     | 1.50 (0.42 to 2.58)                         | 5.76 (3.12 to 8.41)***                    | 1.98 (1.07 to 2.89)                         |
| <i>Child-rated</i>     |                                           |                                             |                                           |                                             |                                           |                                             |
| RCADS-S                | -2.12 (-0.92 to -3.32)***                 | 0.66 (0.29 to 1.03)                         | -2.48 (-4.85 to -0.10)*                   | 0.77 (0.03 to 1.50)                         | -0.29 (-2.75 to 2.16)                     | 0.09 (-0.67 to 0.85)                        |
| ARI                    | -0.63 (-1.40 to 0.14)                     | 0.35 (-0.07 to 0.77)                        | -2.01 (-3.37 to -0.65)**                  | 1.10 (0.36 to 1.85)                         | -1.40 (-2.40 to -0.40)**                  | 0.77 (0.22 to 1.31)                         |
| ISI                    | -4.14 (-5.69 to -2.60)***                 | 1.51 (0.94 to 2.07)                         | -2.64 (-4.36 to -0.92)**                  | 0.96 (0.33 to 1.59)                         | -2.69 (-4.91 to -0.47)*                   | 0.98 (0.17 to 1.79)                         |
| KIDSCREEN-10           | 3.03 (1.80 to 4.27)***                    | 1.31 (0.77 to 1.84)                         | 3.46 (1.93 to 4.99)***                    | 1.49 (0.83 to 2.15)                         | 2.71 (0.65 to 4.76)*                      | 1.17 (0.28 to 2.05)                         |
| <i>Parent-rated</i>    |                                           |                                             |                                           |                                             |                                           |                                             |
| WSAS                   | -3.23 (-5.09 to -1.37)**                  | 0.72 (0.31 to 1.14)                         | -1.50 (-3.27 to 0.27)                     | 0.34 (-0.06 to 0.73)                        | -2.63 (-5.31 to 0.04)                     | 0.59 (-0.01 to 1.19)                        |
| RCADS-S                | -1.59 (-2.94 to -0.24)*                   | 0.53 (0.08 to 0.97)                         | -2.20 (-3.58 to -0.82)**                  | 0.73 (0.27 to 1.18)                         | -1.39 (-3.17 to 0.39)                     | 0.46 (-0.13 to 1.05)                        |
| KIDSCREEN-10           | 2.16 (1.14 to 3.17)***                    | 0.86 (0.46 to 1.27)                         | 2.25 (0.74 to 3.76)**                     | 0.90 (0.30 to 1.51)                         | 1.82 (0.01 to 3.62)*                      | 0.73 (0.00 to 1.45)                         |

I-BA = Internet-delivered behavioural activation; TAU = treatment as usual; CGAS = Children's Global Assessment Scale; CGI-S = Clinical Global Impression – Severity; RCADS-S (A/P) = Revised Children's Anxiety and Depression Scale, short version, anxiety subscales, adolescent and parent version; KIDSCREEN-10 (A/P) = a measure for general health-related quality of life, adolescent and parent version; ISI = Insomnia Severity Index; ARI = Affective Reactivity Index; WSAS (P) = Work and Social Adjustment Scale, parent version  
 \* $p < 0.05$ , \*\* $p < 0.01$ , \*\*\* $p < 0.001$ .  
 ‡All Cohen's *d* effect sizes are calculated from the regression model. The 3-month follow-up effect sizes compare to baseline. Effect sizes of 0.2, 0.5 and 0.8 are considered small, moderate and large, respectively.

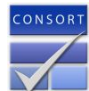

## CONSORT 2010 checklist of information to include when reporting a randomised trial\*

| Section/Topic                    | Item No | Checklist item                                                                                                                                                                              | Reported on page No  |
|----------------------------------|---------|---------------------------------------------------------------------------------------------------------------------------------------------------------------------------------------------|----------------------|
| <b>Title and abstract</b>        |         |                                                                                                                                                                                             |                      |
|                                  | 1a      | Identification as a randomised trial in the title                                                                                                                                           | 1                    |
|                                  | 1b      | Structured summary of trial design, methods, results, and conclusions (for specific guidance see CONSORT for abstracts)                                                                     | 2                    |
| <b>Introduction</b>              |         |                                                                                                                                                                                             |                      |
| Background and objectives        | 2a      | Scientific background and explanation of rationale                                                                                                                                          | 4-5                  |
|                                  | 2b      | Specific objectives or hypotheses                                                                                                                                                           | 5                    |
| <b>Methods</b>                   |         |                                                                                                                                                                                             |                      |
| Trial design                     | 3a      | Description of trial design (such as parallel, factorial) including allocation ratio                                                                                                        | 5                    |
|                                  | 3b      | Important changes to methods after trial commencement (such as eligibility criteria), with reasons                                                                                          | 5                    |
| Participants                     | 4a      | Eligibility criteria for participants                                                                                                                                                       | 5-6                  |
|                                  | 4b      | Settings and locations where the data were collected                                                                                                                                        | 5                    |
| Interventions                    | 5       | The interventions for each group with sufficient details to allow replication, including how and when they were actually administered                                                       | 7-8                  |
| Outcomes                         | 6a      | Completely defined pre-specified primary and secondary outcome measures, including how and when they were assessed                                                                          | 9-10                 |
|                                  | 6b      | Any changes to trial outcomes after the trial commenced, with reasons                                                                                                                       | 10                   |
| Sample size                      | 7a      | How sample size was determined                                                                                                                                                              | 6                    |
|                                  | 7b      | When applicable, explanation of any interim analyses and stopping guidelines                                                                                                                | Study protocol, p 28 |
| <b>Randomisation:</b>            |         |                                                                                                                                                                                             |                      |
| Sequence generation              | 8a      | Method used to generate the random allocation sequence                                                                                                                                      | 10-11                |
|                                  | 8b      | Type of randomisation; details of any restriction (such as blocking and block size)                                                                                                         | 10-11                |
| Allocation concealment mechanism | 9       | Mechanism used to implement the random allocation sequence (such as sequentially numbered containers), describing any steps taken to conceal the sequence until interventions were assigned | 10-11                |
| Implementation                   | 10      | Who generated the random allocation sequence, who enrolled participants, and who assigned participants to interventions                                                                     | 10                   |

|    |                                                      |     |                                                                                                                                                   |                        |
|----|------------------------------------------------------|-----|---------------------------------------------------------------------------------------------------------------------------------------------------|------------------------|
| 1  | Blinding                                             | 11a | If done, who was blinded after assignment to interventions (for example, participants, care providers, those assessing outcomes) and how          | 11                     |
| 2  |                                                      |     |                                                                                                                                                   |                        |
| 3  |                                                      | 11b | If relevant, description of the similarity of interventions                                                                                       | 7                      |
| 4  | Statistical methods                                  | 12a | Statistical methods used to compare groups for primary and secondary outcomes                                                                     | 10                     |
| 5  |                                                      | 12b | Methods for additional analyses, such as subgroup analyses and adjusted analyses                                                                  | Not used               |
| 6  |                                                      |     |                                                                                                                                                   |                        |
| 7  | <b>Results</b>                                       |     |                                                                                                                                                   |                        |
| 8  | Participant flow (a diagram is strongly recommended) | 13a | For each group, the numbers of participants who were randomly assigned, received intended treatment, and were analysed for the primary outcome    | Figures, Figure 1, p 1 |
| 9  |                                                      | 13b | For each group, losses and exclusions after randomisation, together with reasons                                                                  | Figures, Figure 1, p 1 |
| 10 |                                                      |     |                                                                                                                                                   |                        |
| 11 |                                                      |     |                                                                                                                                                   |                        |
| 12 |                                                      |     |                                                                                                                                                   |                        |
| 13 | Recruitment                                          | 14a | Dates defining the periods of recruitment and follow-up                                                                                           | 11                     |
| 14 |                                                      | 14b | Why the trial ended or was stopped                                                                                                                | 5                      |
| 15 |                                                      |     |                                                                                                                                                   |                        |
| 16 | Baseline data                                        | 15  | A table showing baseline demographic and clinical characteristics for each group                                                                  | 13                     |
| 17 | Numbers analysed                                     | 16  | For each group, number of participants (denominator) included in each analysis and whether the analysis was by original assigned groups           | Figures, Figure 1, p 1 |
| 18 |                                                      |     |                                                                                                                                                   |                        |
| 19 |                                                      |     |                                                                                                                                                   |                        |
| 20 | Outcomes and estimation                              | 17a | For each primary and secondary outcome, results for each group, and the estimated effect size and its precision (such as 95% confidence interval) | 15-17                  |
| 21 |                                                      | 17b | For binary outcomes, presentation of both absolute and relative effect sizes is recommended                                                       | Not applicable         |
| 22 |                                                      |     |                                                                                                                                                   |                        |
| 23 | Ancillary analyses                                   | 18  | Results of any other analyses performed, including subgroup analyses and adjusted analyses, distinguishing pre-specified from exploratory         | Not applicable         |
| 24 |                                                      |     |                                                                                                                                                   |                        |
| 25 |                                                      |     |                                                                                                                                                   |                        |
| 26 | Harms                                                | 19  | All important harms or unintended effects in each group (for specific guidance see CONSORT for harms)                                             | 14                     |
| 27 |                                                      |     |                                                                                                                                                   |                        |
| 28 | <b>Discussion</b>                                    |     |                                                                                                                                                   |                        |
| 29 | Limitations                                          | 20  | Trial limitations, addressing sources of potential bias, imprecision, and, if relevant, multiplicity of analyses                                  | 18-19                  |
| 30 | Generalisability                                     | 21  | Generalisability (external validity, applicability) of the trial findings                                                                         | 19                     |
| 31 | Interpretation                                       | 22  | Interpretation consistent with results, balancing benefits and harms, and considering other relevant evidence                                     | 18-19                  |
| 32 |                                                      |     |                                                                                                                                                   |                        |
| 33 | <b>Other information</b>                             |     |                                                                                                                                                   |                        |
| 34 | Registration                                         | 23  | Registration number and name of trial registry                                                                                                    | 2                      |
| 35 | Protocol                                             | 24  | Where the full trial protocol can be accessed, if available                                                                                       | Not available          |
| 36 | Funding                                              | 25  | Sources of funding and other support (such as supply of drugs), role of funders                                                                   | 19                     |
| 37 |                                                      |     |                                                                                                                                                   |                        |
| 38 |                                                      |     |                                                                                                                                                   |                        |
| 39 |                                                      |     |                                                                                                                                                   |                        |
| 40 |                                                      |     |                                                                                                                                                   |                        |
| 41 |                                                      |     |                                                                                                                                                   |                        |
| 42 |                                                      |     |                                                                                                                                                   |                        |

1  
2  
3  
4  
5  
6  
7  
8  
9  
10  
11  
12  
13  
14  
15  
16  
17  
18  
19  
20  
21  
22  
23  
24  
25  
26  
27  
28  
29  
30  
31  
32  
33  
34  
35  
36  
37  
38  
39  
40  
41  
42  
43  
44  
45  
46

\*We strongly recommend reading this statement in conjunction with the CONSORT 2010 Explanation and Elaboration for important clarifications on all the items. If relevant, we also recommend reading CONSORT extensions for cluster randomised trials, non-inferiority and equivalence trials, non-pharmacological treatments, herbal interventions, and pragmatic trials. Additional extensions are forthcoming: for those and for up to date references relevant to this checklist, see [www.consort-statement.org](http://www.consort-statement.org).

For peer review only

# BMJ Open

## Therapist-guided and self-guided Internet-delivered behavioural activation for adolescents with depression: a randomised feasibility trial

|                                 |                                                                                                                                                                                                                                                                                                                                                                                                                                                                                                                                                                                                                                                                                                                                                                                                                                                                                                                                                                                                                                                                                                                                                                                                                                                                                                                                                                                                                                                                                                                                                                                                               |
|---------------------------------|---------------------------------------------------------------------------------------------------------------------------------------------------------------------------------------------------------------------------------------------------------------------------------------------------------------------------------------------------------------------------------------------------------------------------------------------------------------------------------------------------------------------------------------------------------------------------------------------------------------------------------------------------------------------------------------------------------------------------------------------------------------------------------------------------------------------------------------------------------------------------------------------------------------------------------------------------------------------------------------------------------------------------------------------------------------------------------------------------------------------------------------------------------------------------------------------------------------------------------------------------------------------------------------------------------------------------------------------------------------------------------------------------------------------------------------------------------------------------------------------------------------------------------------------------------------------------------------------------------------|
| Journal:                        | <i>BMJ Open</i>                                                                                                                                                                                                                                                                                                                                                                                                                                                                                                                                                                                                                                                                                                                                                                                                                                                                                                                                                                                                                                                                                                                                                                                                                                                                                                                                                                                                                                                                                                                                                                                               |
| Manuscript ID                   | bmjopen-2022-066357.R1                                                                                                                                                                                                                                                                                                                                                                                                                                                                                                                                                                                                                                                                                                                                                                                                                                                                                                                                                                                                                                                                                                                                                                                                                                                                                                                                                                                                                                                                                                                                                                                        |
| Article Type:                   | Original research                                                                                                                                                                                                                                                                                                                                                                                                                                                                                                                                                                                                                                                                                                                                                                                                                                                                                                                                                                                                                                                                                                                                                                                                                                                                                                                                                                                                                                                                                                                                                                                             |
| Date Submitted by the Author:   | 30-Nov-2022                                                                                                                                                                                                                                                                                                                                                                                                                                                                                                                                                                                                                                                                                                                                                                                                                                                                                                                                                                                                                                                                                                                                                                                                                                                                                                                                                                                                                                                                                                                                                                                                   |
| Complete List of Authors:       | Grudin, Rebecca; Karolinska Institutet, Department of Clinical Neuroscience<br>Ahlen, Johan; Karolinska Institutet, Department of Global Public Health; Region Stockholm, The Centre for Epidemiology and Community Medicine<br>Mataix-Cols, David; Karolinska Institute, Centre for Psychiatry Research, Department of Clinical Neuroscience & Stockholm Health Care Services, Region Stockholm, CAP Research Centre<br>Lenhard, Fabian; Karolinska Institute, Centre for Psychiatry Research, Department of Clinical Neuroscience & Stockholm Health Care Services, Region Stockholm, CAP Research Centre<br>Henje, Eva; Umeå Universitet, Department of Clinical Science, Child- and Adolescent Psychiatry<br>Månsson, Cecilia; Region Stockholm, CAMHS Trauma clinic, Child- and Adolescent Mental Health Services<br>Sahlin, Hanna; Karolinska Institutet, Centre for Psychiatry Research, Department of Clinical Neuroscience, Stockholm Health Care Services, Region Stockholm, The Centre for Psychotherapy, Education and Research<br>Beckman, Maria; Karolinska Institute, Centre for Psychiatry Research, Department of Clinical Neuroscience, Stockholm Health Care Services, Region Stockholm, The Centre for Psychotherapy, Education and Research<br>Serlachius, Eva; Karolinska Institutet, Department of Clinical Neuroscience; Lund University, Department of Clinical Sciences, Faculty of Medicine<br>Vigerland, Sarah; Karolinska Institute, Centre for Psychiatry Research, Department of Clinical Neuroscience & Stockholm Health Care Services, Region Stockholm, CAP Research Centre |
| <b>Primary Subject Heading</b>: | Mental health                                                                                                                                                                                                                                                                                                                                                                                                                                                                                                                                                                                                                                                                                                                                                                                                                                                                                                                                                                                                                                                                                                                                                                                                                                                                                                                                                                                                                                                                                                                                                                                                 |
| Secondary Subject Heading:      | Mental health                                                                                                                                                                                                                                                                                                                                                                                                                                                                                                                                                                                                                                                                                                                                                                                                                                                                                                                                                                                                                                                                                                                                                                                                                                                                                                                                                                                                                                                                                                                                                                                                 |
| Keywords:                       | Depression & mood disorders < PSYCHIATRY, MENTAL HEALTH, Child & adolescent psychiatry < PSYCHIATRY, Clinical trials < THERAPEUTICS                                                                                                                                                                                                                                                                                                                                                                                                                                                                                                                                                                                                                                                                                                                                                                                                                                                                                                                                                                                                                                                                                                                                                                                                                                                                                                                                                                                                                                                                           |
|                                 |                                                                                                                                                                                                                                                                                                                                                                                                                                                                                                                                                                                                                                                                                                                                                                                                                                                                                                                                                                                                                                                                                                                                                                                                                                                                                                                                                                                                                                                                                                                                                                                                               |

1  
2  
3  
4  
5  
6  
7  
8  
9  
10  
11  
12  
13  
14  
15  
16  
17  
18  
19  
20  
21  
22  
23  
24  
25  
26  
27  
28  
29  
30  
31  
32  
33  
34  
35  
36  
37  
38  
39  
40  
41  
42  
43  
44  
45  
46  
47  
48  
49  
50  
51  
52  
53  
54  
55  
56  
57  
58  
59  
60

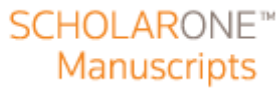



I, the Submitting Author has the right to grant and does grant on behalf of all authors of the Work (as defined in the below author licence), an exclusive licence and/or a non-exclusive licence for contributions from authors who are: i) UK Crown employees; ii) where BMJ has agreed a CC-BY licence shall apply, and/or iii) in accordance with the terms applicable for US Federal Government officers or employees acting as part of their official duties; on a worldwide, perpetual, irrevocable, royalty-free basis to BMJ Publishing Group Ltd ("BMJ") its licensees and where the relevant Journal is co-owned by BMJ to the co-owners of the Journal, to publish the Work in this journal and any other BMJ products and to exploit all rights, as set out in our [licence](#).

The Submitting Author accepts and understands that any supply made under these terms is made by BMJ to the Submitting Author unless you are acting as an employee on behalf of your employer or a postgraduate student of an affiliated institution which is paying any applicable article publishing charge ("APC") for Open Access articles. Where the Submitting Author wishes to make the Work available on an Open Access basis (and intends to pay the relevant APC), the terms of reuse of such Open Access shall be governed by a Creative Commons licence – details of these licences and which [Creative Commons](#) licence will apply to this Work are set out in our licence referred to above.

Other than as permitted in any relevant BMJ Author's Self Archiving Policies, I confirm this Work has not been accepted for publication elsewhere, is not being considered for publication elsewhere and does not duplicate material already published. I confirm all authors consent to publication of this Work and authorise the granting of this licence.



# Therapist-guided and self-guided Internet-delivered behavioural activation for adolescents with depression: a randomised feasibility trial

**Rebecca Grudin<sup>a\*</sup>, Johan Ahlen<sup>b, c</sup>, David Mataix-Cols<sup>a</sup>, Fabian Lenhard<sup>a</sup>, Eva Henje<sup>d</sup>, Cecilia Månsson<sup>e</sup>, Hanna Sahlin<sup>f</sup>, Maria Beckman<sup>f</sup>, Eva Serlachius<sup>g, h</sup>, Sarah Vigerland<sup>a</sup>**

<sup>a</sup>Centre for Psychiatry Research, Department of Clinical Neuroscience, Karolinska Institutet, & Stockholm Health Care Services, Region Stockholm, CAP Research Centre, Gävlegatan 22, SE-113 30 Stockholm, Sweden

<sup>b</sup>The Centre for Epidemiology and Community Medicine, Box 45436, SE-104 31 Stockholm, Region Stockholm, Sweden

<sup>c</sup>Department of Global Public Health, Karolinska Institutet, SE-171 77 Stockholm, Sweden

<sup>d</sup>Department of Clinical Science, Child and Adolescent Psychiatry, Umeå University, SE-901 85 Umeå, Sweden

<sup>e</sup>Child and Adolescent Mental Health Services, Region Stockholm, CAMHS Trauma Clinic, Tideliussgatan 22, SE-118 69 Stockholm, Sweden

<sup>f</sup>Centre for Psychiatry Research, Department of Clinical Neuroscience, Karolinska Institutet, & Stockholm Health Care Services, Region Stockholm, The Centre for Psychotherapy, Education & Research, Liljeholmstorget 7, SE-117 63 Stockholm, Sweden

<sup>g</sup>Department of Clinical Neuroscience, Karolinska Institutet, SE-171 77 Stockholm, Sweden

<sup>h</sup>Department of Clinical Sciences, Faculty of Medicine, Lund University, Baravägen 1, SE-222 40 Lund, Sweden

\*Correspondence to Rebecca Grudin: [rebecca.grudin@ki.se](mailto:rebecca.grudin@ki.se)

Abstract: 300 words

Manuscript: 5 181 words

Number of references: 76

## 1 Abstract

2 **Objective:** Access to effective treatments for adolescents with depression needs to improve.  
3 Few studies have evaluated behavioural activation (BA) for adolescent depression, and none  
4 remotely-delivered BA. This study explored the feasibility and acceptability of therapist-  
5 guided and self-guided Internet-delivered BA (I-BA) in preparation for a future randomised  
6 controlled trial (RCT).

7 **Design:** A single-masked randomised controlled feasibility trial.

8 **Setting:** A specialist outpatient clinic in Sweden.

9 **Participants:** Thirty-two adolescents with mild to moderate major depression, aged 13–17.

10 **Interventions:** Ten weeks of therapist-guided I-BA or self-guided I-BA, or treatment as usual  
11 (TAU). Both versions of I-BA included parental support. TAU included referral to usual care  
12 within child and youth psychiatry or primary care.

13 **Outcomes:** Feasibility measures included study take-up, participant retention, acceptability,  
14 safety, and satisfaction. The primary outcome measure was the masked assessor-rated  
15 Children's Depression Rating Scale, Revised. The primary endpoint was the three-month  
16 follow-up.

17 **Results:** 154 adolescents were screened and 32 were randomised to therapist-guided I-BA (n  
18 = 11), self-guided I-BA (n = 10), or TAU (n = 11). Participant retention was acceptable, with  
19 two drop-outs in TAU. Most participants in TAU had been offered interventions by the  
20 primary endpoint. The mean number of completed chapters (total of 8) for adolescents was  
21 7.5 in therapist-guided I-BA and 5.4 in self-guided I-BA. No serious adverse events were  
22 recorded. Satisfaction was acceptable in both I-BA groups. Following an intent-to-treat  
23 approach, the linear mixed effects model revealed that both therapist-guided and self-guided  
24 I-BA (Cohen's  $d = 2.43$  and  $2.23$  respectively), but not TAU (Cohen's  $d = 0.95$ ), showed  
25 statistically significant changes on the primary outcome measure with large within-group  
26 effect sizes.

27 **Conclusions:** Both therapist-guided and self-guided I-BA are acceptable and potentially  
28 efficacious treatments for adolescents with depression. It is feasible to conduct a large-scale  
29 RCT to establish the efficacy and cost-effectiveness of I-BA vs TAU.

30  
31 **Trial registration number:** Clinicaltrials.gov, NCT04117789.

32 **Trial funding:** Kavli Trust and Frimurare Barnhuset Trust in Stockholm.

1  
2  
3 33 **Article summary: Strengths and limitations of this study**

- 4 34 • Strengths include a randomised controlled design, use of an active control group, and  
5  
6 35 careful assessment of the contents of TAU.  
7  
8 36 • An additional strength was that assessors were masked to treatment allocation at the  
9  
10 37 primary endpoint.  
11  
12 38 • Limitations include the heterogenous condition of TAU and masked assessors  
13  
14 39 correctly guessing group allocation more often than by chance.  
15  
16  
17  
18

19 41 **Keywords**

20 42 Depression; Adolescents; Feasibility trial; Behavioural activation; Self-guided; Internet  
21 43 interventions  
22  
23  
24  
25  
26  
27  
28  
29  
30  
31  
32  
33  
34  
35  
36  
37  
38  
39  
40  
41  
42  
43  
44  
45  
46  
47  
48  
49  
50  
51  
52  
53  
54  
55  
56  
57  
58  
59  
60

## 44 Introduction

45 Depression is one of the leading causes of disability worldwide[1]. Adolescence is a risk  
46 period for developing depression, associated with a sharp increase in prevalence[2 3].  
47 Comorbidity with other mental disorders is prevalent among adolescents with depression[4],  
48 with sleep disorders and anxiety being among the most common[5]. Adolescent depression is  
49 associated with a range of adverse outcomes, including impaired academic, social, and work  
50 functioning[6 7], poor mental and physical health in adulthood[8 9], and increased risk of  
51 suicide[10]. Early detection and treatment of adolescent depression markedly decreases the  
52 likelihood of future clinical depression and other mental health issues[11].

53  
54 Cognitive Behaviour Therapy (CBT) is a well-established intervention for adolescents with  
55 depression[12], and is also currently recommended in clinical practice and national  
56 guidelines[13 14]. Behavioural activation (BA) is an important component of CBT for  
57 depression, but can also be delivered as a stand-alone therapy[15]. The main goal of BA is to  
58 increase engagement in values-based activities and to decrease the avoidant behaviours that  
59 often maintain depressive symptoms[16-19]. BA is considered an evidence-based treatment  
60 for adults with depression[20 21] and three open trials indicate that BA is also a feasible  
61 intervention for adolescents with depression[16 17 19]. A small RCT that compared BA to  
62 evidence-based interventions (CBT and Interpersonal psychotherapy) showed promising  
63 results[18], but BA for depressed adolescents has yet to be evaluated in an adequately  
64 powered RCT. BA, unlike traditional CBT for depression, does not include cognitive  
65 restructuring[22], although it seems to be equally effective [23]. Furthermore, dismantling  
66 studies have proposed that BA might be a sufficient treatment component on its own[24 25].  
67 In line with this suggestion, a meta-analysis of adolescent depression treatments found that  
68 psychological interventions with a cognitive component were no more effective than those  
69 without cognitive work[26]. Because BA is brief and readily understood, it might suit  
70 adolescents particularly well. Another potential benefit is that, given its focus on reducing  
71 avoidance behaviours[27], BA may also be effective for reducing anxiety, which is important  
72 because anxiety is often co-morbid with depression in this age group[5].

73  
74 Despite the high prevalence of depression among young people, only a minority receive  
75 evidence-based treatments[28-30]. Internet-delivered CBT (ICBT) was developed to improve  
76 access to treatment, and has several potential advantages over traditional in-person treatments,

1  
2  
3 77 (bridging geographical distances, requiring less therapist time, lower risk of therapist drift,  
4 78 etc.[31]). Studies in adults have shown that ICBT is effective and probably cost-effective for  
5 79 several psychiatric disorders, including depression[31]. In children and adolescents, there is  
6 80 growing support for the efficacy of ICBT for several psychiatric disorders[32], but it is still  
7 81 unclear whether ICBT is an efficacious intervention for adolescent depression. To date, three  
8 82 trials on ICBT with clinically depressed adolescents have been published. Two of them (both  
9 83 N = 70), included therapist-chat communication and showed significant reductions in  
10 84 depressive symptoms for adolescents compared to attention control[33 34]. The third, an open  
11 85 trial (N = 15) investigating the feasibility of a transdiagnostic Internet-delivered intervention  
12 86 based on rational emotive behaviour therapy for adolescents diagnosed with anxiety and  
13 87 depressive disorders, found a reduction in self-reported anxiety and depressive symptoms[35].  
14 88 A number of ICBT studies have also been conducted in subclinical samples with promising  
15 89 results[36-39].

16  
17  
18  
19  
20  
21  
22  
23  
24  
25  
26  
27 90 Internet-based interventions can be either therapist-guided or self-guided, i.e. delivered with  
28 91 or without remote therapist support. According to a recent meta-analysis of ICBT for adults,  
29 92 therapist-guided ICBT was associated with greater improvement than self-guided  
30 93 treatment[40]. However, self-guided ICBT was as effective as guided ICBT among adults  
31 94 with mild or sub-threshold depression. The importance of therapist support is unclear in  
32 95 children and adolescents, and results are inconsistent[41] [42]. If ICBT could be entirely  
33 96 unguided, without sacrificing efficacy and safety, it could drastically increase availability to  
34 97 treatment.

35  
36  
37  
38  
39  
40  
41  
42 98 Adequately powered trials are needed to explore whether ICBT with and without therapist-  
43 99 support is safe, effective, and cost-effective for adolescent depression. However, important  
44 100 questions regarding feasibility of study design, acceptability of interventions, and preliminary  
45 101 efficacy should be addressed before conducting large trials. Therefore, we designed a  
46 102 randomised feasibility trial of therapist-guided and self-guided Internet-delivered BA (I-BA),  
47 103 to compare to treatment as usual (TAU). The primary objective of the study was to evaluate  
48 104 the feasibility of the study design, e.g., study take-up, participant retention, and feasibility of  
49 105 using TAU as a control group. Secondary objectives were to explore the acceptability of the I-  
50 106 BA interventions, e.g., treatment adherence, credibility, satisfaction, and adverse events, and  
51 107 to provide preliminary clinical efficacy data to assist with power calculations for a fully  
52  
53  
54  
55  
56  
57  
58  
59  
60

1  
2  
3 108 powered trial. This will also be the first trial to explore online delivered BA for depressed  
4  
5 109 adolescents and their parents.  
6  
7

## 8 110 **Methods**

### 10 111 **Study design**

12 112 This study was a single-masked, parallel three-arm randomised controlled feasibility trial of  
13 113 therapist-guided I-BA, self-guided I-BA, and TAU for adolescents with mild to moderate  
14 114 major depressive disorder (MDD). Group allocation was masked for outcome assessors, but  
15 115 not for participants or therapists. Participants were randomly assigned at a 1:1:1 ratio. The  
16 116 study was conducted at a clinical research unit within Child and Adolescent Mental Health  
17 117 Services (CAMHS) in Stockholm, Sweden. The planned recruitment period was six months.  
18 118 Masked rater assessments were conducted at post-treatment (week 11) and three-month  
19 119 follow-up (primary end point) visits. There were two reasons for setting the three-month-  
20 120 follow up as the primary end point: first, this increased the likelihood that participants  
21 121 assigned to TAU would have received treatment; second, previous ICBT trials have shown a  
22 122 continued improvement from post-treatment to three-month follow-up[43 44]. No changes in  
23 123 the methods were made after the registration and subsequent start of the trial.  
24  
25  
26  
27  
28  
29  
30  
31  
32

### 33 124 34 125 **Participants**

36 126 Inclusion criteria were: age 13–17; a diagnosis of mild or moderate MDD according to the  
37 127 *DSM-5*[45]; use of psychotropic medications (i.e., antidepressants, central stimulants, and  
38 128 antipsychotics) that had been stable for at least six weeks prior to inclusion; at least one  
39 129 caregiver able to partake in the treatment; both adolescent and caregiver fluent in Swedish;  
40 130 access to the internet via a smartphone and a computer.  
41  
42  
43  
44  
45  
46

47 132 Exclusion criteria were: acute psychiatric problems (e.g., high risk of suicide or alcohol and  
48 133 substance abuse); social problems requiring other immediate actions (e.g., abuse in the family,  
49 134 high and prolonged absence from school); previous CBT for MDD within the last 12 months  
50 135 (defined as  $\geq 3$  sessions of CBT/BA, other than psychoeducation); current use of  
51 136 benzodiazepines; ongoing psychological treatment for any psychiatric disorder.  
52  
53  
54  
55  
56  
57  
58  
59  
60

## 138 **Sample size**

139 This feasibility trial was not powered to detect statistically significant differences between  
140 groups. However, we aimed to include a sufficient number of participants to explore within-  
141 group changes from baseline to the primary end point. In two recent RCTs[18 46], large  
142 within-group effects were found on depressive symptoms ( $d > 1.2$ ;  $d = 1.4$ ). Based on  
143 previous results, we aimed to recruit a total of 45 participants to be able to detect a within-  
144 group effect of  $d=1.2$  (alpha value of 0.05 and 90% power), taking a potentially high attrition  
145 of 25% into account. Power calculation was performed using Statulator[47].  
146

## 147 **Recruitment and procedures**

148 Participants were recruited at CAMHS and primary health care clinics through information  
149 distributed orally and electronically to managers and clinicians, and via flyers distributed in  
150 waiting rooms. About three months after the study began, we also advertised in newspapers  
151 and social media. Referrals from healthcare professionals and self-referrals from families all  
152 over Sweden were also accepted.  
153

154 Applicants were first contacted for an initial telephone screening and then invited to a face-to-  
155 face visit for a thorough assessment of study eligibility. Video assessments were offered to  
156 families that could not travel to the clinic and to everyone after the start of the COVID-19  
157 pandemic. Verbal and written information was provided to the adolescents and their parents,  
158 who all gave written consent. During the face-to-face assessment, a trained psychologist: a)  
159 verified the MDD diagnosis, according to the DSM-5 criteria; b) assessed current level of  
160 depression symptom severity using the CDRS-R; and c) assessed psychiatric comorbidity.  
161 After the assessment, included participants and parents completed the baseline measures and  
162 were then randomised. Within a week after completion of the baseline measures, patients  
163 allocated to the I-BA treatments started treatment, and participants allocated to TAU received  
164 a referral to their local CAMHS or paediatric primary care unit. **Figure 1** shows the  
165 CONSORT flowchart.  
166

167 To ensure patient safety, participants in all treatments were given brief, weekly questions  
168 about depressive symptoms during the intervention, which allowed suicidal ideation to be  
169 monitored and, if needed, assessed. If further psychiatric assessments or any preventive  
170 actions were needed, the study team referred the patient to emergency psychiatric services.

1  
2  
3 171  
4  
5 172 Follow-up assessments were conducted at post-treatment and after three months by assessors  
6 173 masked to treatment allocation. Self- and parent-reported measures were completed online at  
7  
8 174 all assessment points.  
9

10 175

## 11 176 **Interventions**

12  
13 177 The specific I-BA treatment protocol was developed and adapted to an online format for this  
14 178 study, and although it has not been otherwise evaluated in its current form, it was inspired by  
15 179 previous BA protocols[18 48]. BA commonly provides treatment rationale and  
16  
17 180 psychoeducation, activity monitoring, activity scheduling, contingency management, values  
18  
19 181 and goal assessments, and skills training in problem solving and communication skills,  
20  
21 182 relaxation techniques, and relapse prevention. BA also targets verbal and avoidance  
22  
23 183 behaviours[49]. While various BA protocols include and emphasize different components,  
24 184 activity monitoring and scheduling are always present[50]. In our protocol, we included all of  
25  
26 185 the aforementioned BA components apart from relaxation. Verbal behaviours were targeted  
27  
28 186 through shifting focus. Sleep hygiene was added to the BA protocol because sleep problems  
29  
30 187 are a common comorbidity of depression[5] that are often addressed in face-to-face BA[51].  
31  
32 188

33

34 189 The two I-BA treatments were delivered through a secure online platform, each consisting of  
35 190 eight chapters with age-appropriate texts, animations, films, and various exercises delivered  
36 191 over ten weeks. Each chapter took approximately 30 to 60 minutes to complete. The first four  
37  
38 192 chapters introduced the most essential components of BA (i.e., scheduling of values-based  
39  
40 193 activities and targeting avoidance behaviours). An overview of the treatment content is  
41  
42 194 presented in **Table 1**, and sample screenshots from the intervention are presented in  
43  
44 195 supplementary **Figure S1**.  
45

46 196

47  
48 197 Between each chapter, both adolescents and parents were assigned homework (see **Table 1**  
49 198 for details). To assist the adolescents with these assignments, a mobile application was  
50 199 developed to provide summaries of each chapter, instructions for homework assignments, and  
51  
52 200 an activity diary to help with planning and evaluation of scheduled activities. The application  
53  
54 201 included automatic prompts to login in case of inactivity and an easily-accessible  
55  
56 202 individualized emergency plan.  
57  
58  
59  
60



1  
2  
3 203 In the therapist-guided I-BA arm, the participants had weekly asynchronous contact with a  
4  
5 204 clinical psychologist via written messages within the platform. The psychologists logged in at  
6  
7 205 least every other day during workdays to provide feedback, answer questions, and, if needed,  
8  
9 206 prompt the participants to complete the next chapter. The therapists were recommended to  
10  
11 207 spend around 20 to 30 minutes per family per week. Occasional phone calls were added when  
12  
13 208 deemed necessary. The content of the self-guided I-BA programme was identical to the  
14  
15 209 therapist-guided version, except that the participants did not have access to any therapist  
16  
17 210 support.

18 211 Both conditions of I-BA in this study included a parallel eight-chapter course for parents (see  
19  
20 212 **Table 1** for details) which was accessed through separate login accounts. Involving parents is  
21  
22 213 a common BA adaptation for young people, and parents are taught how to encourage the  
23  
24 214 young person to complete scheduled activities[50]. This parental course was based on CBT-  
25  
26 215 strategies commonly used in parent training programs[52] such as praise and other forms of  
27  
28 216 positive parental attention aiming at strengthening the relationship between caregivers and  
29  
30 217 their children. The control condition was treatment as usual (TAU). Participants randomised  
31  
32 218 to TAU were referred to their local CAMHS or paediatric primary care services and were free  
33  
34 219 to receive any treatment, whether psychosocial, pharmacological, or a combination of both.

35 220  
36  
37  
38  
39  
40  
41  
42  
43  
44  
45  
46  
47  
48  
49  
50  
51  
52  
53  
54  
55  
56  
57  
58  
59  
60

221 **Table 1.** An overview of the treatment content of I-BA.

| Chapter                                                                                       | Adolescent                                                                                                                                                                                                  | Parent                                                                                                                                                                                                                                                                               |
|-----------------------------------------------------------------------------------------------|-------------------------------------------------------------------------------------------------------------------------------------------------------------------------------------------------------------|--------------------------------------------------------------------------------------------------------------------------------------------------------------------------------------------------------------------------------------------------------------------------------------|
| 1                                                                                             | Introduction to I-BA. Psychoeducation about depression. Rationale for BA. <i>Homework:</i> activity monitoring.                                                                                             | Introduction to I-BA. Psychoeducation about depression. Rationale for BA. Learning about common parental traps. <i>Homework:</i> noticing one's parental behaviours when the adolescent shows depressive behaviours. Discussing with the adolescent how to collaborate in treatment. |
| 2                                                                                             | Values assessment. Set treatment goals. <i>Homework:</i> activity scheduling.                                                                                                                               | Facilitating and encouraging values-based activation. Communication skills part I: validating your child's feelings. <i>Homework:</i> practising validating others' and your child's emotions, encouraging values-based activation.                                                  |
| 3                                                                                             | Continued values-based activation. Psychoeducation about sleep. <i>Homework:</i> activity scheduling and sleep hygiene.                                                                                     | Spending positive time with your adolescent. <i>Homework:</i> suggesting positive time with your adolescent.                                                                                                                                                                         |
| 4                                                                                             | Continued values-based activation. Overcoming barriers to activation through identifying and overcoming avoidance. <i>Homework:</i> activity scheduling, sleep hygiene and practising overcoming avoidance. | Communication skills part II: avoiding and managing conflicts. <i>Homework:</i> practising conflict management.                                                                                                                                                                      |
| 5                                                                                             | Continued values-based activation. Overcome barriers to activation through shifting focus to the present situation. <i>Homework:</i> activity scheduling, sleep hygiene, and practising shifting focus.     | Taking care of yourself as a parent supporting a child with depression. <i>Homework:</i> taking care of yourself.                                                                                                                                                                    |
| 6                                                                                             | Continued values-based activation. Problem solving. <i>Homework:</i> activity scheduling, sleep hygiene, and practising problem-solving.                                                                    | Collaborative problem-solving. <i>Homework:</i> practising collaborative problem-solving.                                                                                                                                                                                            |
| 7                                                                                             | Putting it all together. <i>Homework:</i> activity scheduling.                                                                                                                                              | Putting it all together. <i>Homework:</i> choosing two tasks from previously introduced skills.                                                                                                                                                                                      |
| 8                                                                                             | Treatment summary. Relapse prevention. Evaluation of treatment.                                                                                                                                             | Course summary. Relapse prevention. Evaluation of treatment.                                                                                                                                                                                                                         |
| Abbreviations: I-BA = Internet-delivered Behavioural Activation, BA = Behavioural Activation. |                                                                                                                                                                                                             |                                                                                                                                                                                                                                                                                      |

222

## 223 **Patient involvement**

224 Three patient representatives who had previously suffered from depression were involved in  
225 the development of I-BA, providing feedback on language and content, ensuring that the  
226 content was inclusive (e.g. of LGBTQ concerns), understandable and useful.

## 228 **Measures**

### 229 **Baseline assessment**

230 The Mini-International Neuropsychiatric Interview for Children (MINI-KID)[53] was  
231 administered to confirm the primary diagnosis of MDD and to screen for psychiatric  
232 comorbidities. Suicide risk assessment was based on all available information, including the  
233 sections about suicidality in MINI-KID and CDRS-R collected at the inclusion assessment  
234 visit. To assess recurrent non-suicidal self-injury, the seven-item Deliberate Self-Harm  
235 Inventory for youths[54] was used. Demographic data of adolescents (e.g., age, gender,  
236 current and previous psychotropic medication, and previous psychological treatment) were  
237 collected at the initial assessment, and data about the parents were collected through an online  
238 questionnaire.

### 240 **Study design feasibility**

241 We evaluated study take-up by calculating the average number of included participants per  
242 week. Participant retention is presented in **Figure 1**. The specific contents of TAU in terms of  
243 type and indication for medication, number of visits, type of psychological or psychosocial  
244 treatment and number of sessions, and number of sessions of other potential interventions  
245 were collected from each participant's official medical records and by interviewing the  
246 families after the three-month follow-up assessment.

### 248 **Acceptability of I-BA**

249 The average number of completed chapters for adolescents and their parents were  
250 documented. Adolescents who completed less than half (< 4) of the I-BA-chapters were  
251 defined as having discontinued treatment.

252  
253 To measure treatment credibility, four questions were administered to all adolescents and  
254 their parents at week three: 1) How much did they believe the treatment suited adolescents  
255 with depression? 2) How much did they believe the treatment would help them? 3) If and to  
256 what extent would they recommend this treatment to a friend with depression? and 4) How

1  
2  
3 257 much improvement did they expect from the treatment? The total range of this scale was 4 to  
4  
5 258 20, with higher values representing higher credibility.

6  
7 259

8 260 Treatment satisfaction was assessed with the Client Satisfaction Questionnaire (CSQ) at post-  
9  
10 261 treatment (adolescent and parent version; total range 8–32, with higher values indicating  
11  
12 262 higher satisfaction)[55]. All adverse events, i.e. untoward medical occurrences after exposure  
13  
14 263 to the intervention (but not necessarily caused by the intervention) were communicated by  
15  
16 264 participants (e.g. via SMS, phone calls, at follow-up visits) and documented by the trial  
17  
18 265 coordinator (RG) until three-month follow-up. Adverse events were also assessed with the  
19  
20 266 Negative Effects Questionnaire with 20 items (NEQ-20) administered at post-treatment and at  
21  
22 267 three-month follow-up (adolescent and parent version; total range 0–80, with higher values  
23  
24 268 representing more reported adverse events)[56]. NEQ has been developed to investigate  
25  
26 269 negative effects of psychological treatments, such as experiencing unpleasant feelings during  
27  
28 270 treatment and not believing that things can improve. Because we did not systematically ask  
29  
30 271 about adverse events, the administration of NEQ at predefined time points increased the  
31  
32 272 likelihood of identifying adverse events. Furthermore, NEQ includes treatment-related  
33  
34 273 questions like lacking confidence in one’s treatment or having unpleasant memories resurface  
35  
36 274 (these factors are often not reported spontaneously).

37  
38 275

39 276 Therapist time was logged automatically in the treatment platform. The platform registered  
40  
41 277 how many minutes the therapist spends on each participant (including reading their responses  
42  
43 278 and providing feedback). The entire time a therapist had a certain participant “open” was  
44  
45 279 included, e.g., navigating between worksheets, answering messages, etc. If therapists were  
46  
47 280 interrupted while working, they could edit the amount of time registered to a more accurate  
48  
49 281 sum. Time spent on phone calls with adolescents and their parents was logged manually by  
50  
51 282 the therapist. These two indicators, i.e., therapist time in the platform and time spent on phone  
52  
53 283 calls, were combined as a measure of therapist time per family and chapter.

54  
55 284

56 285 Working alliance was assessed with the Working Alliance Inventory-6 items (WAI-6) at three  
57  
58 286 weeks and post-treatment (adolescent and parent versions)[57].

59  
60 287

288

### 289 **Clinical outcomes**

290 The Children's Depression Rating Scale, Revised (CDRS-R, primary measure of clinical  
291 efficacy) is a semi-structured clinical interview used to assess depressive symptom severity in  
292 children (total range 17–113 with higher values representing more depressive symptoms)[58].

293 All interviews with CDRS-R were audio-recorded.

294

295 Other clinician-rated measures included the Children's Global Assessment Scale (CGAS)[59]  
296 and Clinical Global Impression Scale – Severity and Improvement (CGI-S and CGI-I)[60].

297 CGI-I was only conducted at post-treatment and the three-month follow-up. Treatment  
298 response was defined as a CGI-I rating of 1 or 2 at the three-month follow-up. Percentages  
299 that still fulfilled MDD diagnosis at three-month follow-up will be presented.

300

301 Depressive symptoms were assessed with the Short Mood and Feelings Questionnaire  
302 (SMFQ, adolescent and parent versions, total range 0–26 with higher values representing  
303 more symptoms)[61 62]. Impaired functioning due to depression was measured with the  
304 Work and Social Adjustment Scale (WSAS, adolescent and parent versions, total range 0–40  
305 with higher values indicating greater impairment)[63]. Anxiety symptoms were assessed by  
306 the anxiety subscales in the Revised Children's Anxiety and Depression Scale – Short version  
307 (RCADS-S, adolescent and parent versions; total range 0–45 with higher values indicating  
308 worse outcome)[64]. KIDSCREEN-10 Index (adolescent and parent versions, total range 10–  
309 50 with higher values indicating better quality of life) was used to measure general health-  
310 related quality of life[65]. Difficulties with sleep were measured by the Insomnia Severity  
311 Index (ISI, adolescent version, total range 0–28 with higher values indicating a worse  
312 outcome)[66] and irritability by Affective Reactivity Index (ARI, adolescent version, total  
313 range 0–12 with higher values indicating worse outcome)[67].

314

315 Behavioral Activation of Depression Scale Short Form (BADSF) is a self-report measure  
316 developed to measure the proposed mediators of BA, i.e., activation and avoidances[68].

317 Total range of the scales is 0–54 with higher values indicating high activation and low  
318 avoidance. Need for further treatment was assessed at three-month follow-up with a non-  
319 validated single-item questionnaire (adolescent and parent versions). ISI, ARI, and BADS  
320 were administered to adolescents only.

321

1  
2  
3 322 WAI, BADS-SF and Need for further treatment were included in this study to test for  
4 323 feasibility only and will be presented in the supplementary material. No changes were made  
5 324 to outcomes after the trial commenced. More information on measures is available in Data  
6 325 supplement 1.  
7  
8  
9

10 326

## 11 327 **Randomisation and allocation concealment**

12 328 Block randomisation, with five random sets of blocks of three and six respectively, were  
13 329 created by an independent clinician using an online service (<http://www.random.org>). Once a  
14 330 participant was included, the independent clinician opened a sealed opaque envelope  
15 331 revealing a numbered paper with treatment allocation.  
16  
17  
18  
19

20 332

21 333 Post-treatment and three-month follow-up assessments were conducted by four clinical  
22 334 psychologists masked to treatment allocation. In the event of unmasking, a new assessor re-  
23 335 rated the recording. Masking integrity was measured at each assessment point by asking  
24 336 masked assessors to guess each participant's group allocation and indicate the reasons for  
25 337 their conjecture (e.g., totally random guess, impression of improvement, etc.)[69].  
26  
27  
28  
29

30 338

## 31 339 **Analytical methods**

32 340 Data on trial feasibility (e.g., study take-up, participant retention, and content of TAU) and  
33 341 data on acceptability (e.g., adherence, credibility, satisfaction, and adverse events) were  
34 342 analysed using descriptive statistics.  
35  
36  
37  
38  
39

40 343

41 344 We used linear mixed regression models to estimate within-group effects for all continuous  
42 345 clinical outcome measures. All models included a fixed effect of time and a random intercept  
43 346 for participant effect. In contrast to standard modeling of repeated data, where listwise  
44 347 deletion is used for all cases with missing data at any time point[70], the linear mixed model  
45 348 estimates effects using all available observations at all time-points. The linear mixed model  
46 349 has been shown to yield reliable estimates in various types of missing data patterns[71]. Time  
47 350 was treated as a continuous variable from 0–2 (pre-treatment, post-treatment, and three-month  
48 351 follow-up) because there were three months between each time point. Alpha levels (two-  
49 352 tailed) were set to  $p < 0.05$ . Within-group effect sizes (Cohen's  $d$ ) were calculated using the  
50 353 accumulated beta-coefficients (pre-treatment to three-month follow-up) from the regression  
51 354 models as the nominator and the pooled SD at pre-treatment as the denominator [72].  
52  
53  
54  
55  
56  
57  
58  
59  
60

355 Additionally, the proportion of treatment responders at three-month follow-up was calculated  
356 with intent to treat analysis according to pre-specified criteria. Analyses were performed with  
357 SPSS version 27 and Excel version 16.

358

## 359 **Results**

### 360 **Study design feasibility**

#### 361 **Study take-up**

362 Between 14 October 2019 and 24 April 2020, a total of 154 families were screened by  
363 telephone and 32 participants were included. Approximately a fourth had been recommended  
364 by a health care provider to self-refer to the study. The recruitment rate was slow before we  
365 started advertising in local media (0.5 included per week), but higher after advertising (2.3  
366 included per week). Although we had not reached the goal of including 45 participants after  
367 the planned six-month recruitment period, we decided to end recruitment because we had  
368 fewer drop-outs than expected and thus enough participants to answer our feasibility  
369 questions.

370

371

#### 372 **Participant retention and study flow**

373 A total of 32 adolescents from all over Sweden were recruited and randomised to therapist-  
374 guided I-BA (n = 11), self-guided I-BA (n = 10) or TAU (n = 11). **Table 2** shows the  
375 demographic and clinical characteristics of the sample at baseline. **Figure 1** shows the study  
376 flow. Two participants dropped out of the study. Both drop-outs were dissatisfied that they  
377 had been allocated to TAU and did not want to attend their appointments within regular  
378 healthcare or continue as study participants. At post-treatment, there were no missing data on  
379 the primary outcome measure CDRS-R in therapist-guided I-BA, one in self-guided, and two  
380 in TAU. At three-month follow-up, there were missing data for one participant in therapist-  
381 guided, three in self-guided, and two in TAU. The final three-month follow-up assessment  
382 occurred on 15 October 2020.

383

384 *Figure 1 approximately here.*

385

386

387 **Table 2.** Baseline demographic and clinical characteristics of the total sample and for each  
 388 group.

|                                       | Total (n = 32)    | Therapist-guided I-BA (n = 11) | Self-guided I-BA (n = 10) | TAU (n = 11)      |
|---------------------------------------|-------------------|--------------------------------|---------------------------|-------------------|
| Age, mean (SD), min-max               | 15.4 (1.6), 13–17 | 14.6 (1.2), 13–17              | 15.1 (1.8), 13–17         | 16.5 (1.3), 14–17 |
| Gender, n (%)                         |                   |                                |                           |                   |
| Female                                | 19 (59%)          | 6 (55%)                        | 7 (70%)                   | 6 (55%)           |
| Male                                  | 13 (41%)          | 5 (45%)                        | 3 (30%)                   | 5 (45%)           |
| Main contact person, mothers, n (%)   | 30 (94%)          | 9 (82%)                        | 10 (100%)                 | 11 (100%)         |
| Education of contact person           |                   |                                |                           |                   |
| Elementary school                     | 1 (3%)            | 0 (0%)                         | 0 (0%)                    | 1 (3%)            |
| High school                           | 3 (9%)            | 1 (9%)                         | 1 (10%)                   | 1 (9%)            |
| Higher education < 2 years            | 5 (16%)           | 1 (9%)                         | 4 (40%)                   | 0 (0%)            |
| Higher education > 2 years            | 21 (66%)          | 7 (64%)                        | 5 (50%)                   | 9 (82%)           |
| Post-graduate degree                  | 2 (6%)            | 2 (18%)                        | 0 (0%)                    | 0 (0%)            |
| Comorbidity <sup>1</sup> , n (%)      |                   |                                |                           |                   |
| None                                  | 6 (19%)           | 1 (9%)                         | 2 (20%)                   | 3 (27%)           |
| One diagnosis                         | 12 (38%)          | 5 (45%)                        | 3 (30%)                   | 4 (36%)           |
| Two or more diagnoses                 | 14 (44%)          | 5 (45%)                        | 5 (45%)                   | 4 (36%)           |
| Anxiety disorder/s <sup>1</sup>       | 23 (72%)          | 7 (64%)                        | 8 (80%)                   | 8 (73%)           |
| ADHD/ASD                              | 5 (16%)           | 3 (27%)                        | 0 (0%)                    | 2 (18%)           |
| Current use of antidepressants, n (%) | 2 (6%)            | 1 (9%)                         | 0 (0%)                    | 1 (3%)            |
| Risk for suicide <sup>2</sup>         |                   |                                |                           |                   |
| No suicidal ideation                  | 3 (9%)            | 1 (9%)                         | 0 (0%)                    | 2 (18%)           |
| Low risk                              | 16 (50%)          | 6 (55%)                        | 4 (40%)                   | 6 (55%)           |
| Moderate risk                         | 13 (41%)          | 4 (36%)                        | 6 (60%)                   | 3 (27%)           |
| High risk                             | 0 (0%)            | 0 (0%)                         | 0 (0%)                    | 0 (0%)            |

<sup>1</sup>Including all anxiety disorders in MINI-KID. <sup>2</sup>According to the definitions of suicidality used in MINI-KID. Abbreviations: ADHD, attention-deficit/hyperactivity disorder; ASD, autism spectrum disorder.



390  
391 **Treatment content in TAU**

392 Five of the referrals were sent to primary care and six to CAMHS. Two participants in TAU  
393 never attended the first visits at the clinic to which they were referred. Five out of 11  
394 participants allocated to TAU had started an intervention by post-assessment. This number  
395 had increased to nine at the three-month follow-up. According to interviews with families and  
396 medical records at the three-month follow-up, patients in TAU received pharmacological ( $n =$   
397 1), psychological ( $n = 1$ ), supportive ( $n = 1$ ), or a combination of these interventions ( $n = 4$ ) as  
398 well as psychiatric ( $n = 1$ ) or neuropsychiatric assessment and medications ( $n = 1$ ) during the  
399 study. Details on TAU content are presented in supplementary **Table S1a-b**.

400  
401 **Acceptability of I-BA**

402 **Treatment adherence**

403 The average number of completed chapters at post-treatment was 7.5 (SD 1.0) for adolescents  
404 and 7.4 (SD 1.3) for parents in therapist-guided I-BA, and 5.4 (SD 2.5) for adolescents and  
405 5.9 (SD 2.8) for parents in self-guided I-BA. Eight adolescents (73%) and eight parents (73%)  
406 in therapist-guided I-BA, and three adolescents (30%) and four parents (40%) in self-guided  
407 I-BA had completed all eight chapters by the end of treatment. Zero participants in therapist-  
408 guided I-BA, and three in self-guided I-BA, discontinued treatment.

409  
410 **Credibility and satisfaction**

411 Average treatment credibility was 14.3 (SD 2.7) for therapist-guided I-BA ( $n = 11$ ), 14.1 (SD  
412 3.9) for self-guided I-BA ( $n = 9$ ), and 11.1 (SD 3.4) for TAU ( $n = 8$ ). Average treatment  
413 satisfaction at post-treatment was 24.7 (SD 5.33) for therapist-guided I-BA ( $n = 11$ ), 21.3 (SD  
414 6.8) for self-guided I-BA ( $n = 9$ ), and 17.7 (SD 6.3) for TAU ( $n = 10$ ).

415  
416 **Adverse events and negative effects**

417 From baseline to three-month follow-up, 17 adverse events were documented each in  
418 therapist-guided and self-guided I-BA and 25 in TAU. None of the adverse events were  
419 assessed as serious. The most commonly reported negative effect on NEQ in the I-BA-groups,  
420 reported by a total of five participants from both groups, was not trusting the treatment and  
421 not feeling that the treatment produced any results. In TAU, the most commonly reported  
422 negative effects on NEQ were feeling that the treatment did not produce any results, feeling  
423 that the treatment was not motivating, and not always understanding the treatment.

1  
2  
3 4244  
5 425 **Therapist time (therapist-guided I-BA)**

6 426 The average therapist time per family and chapter was 23 minutes (SD = 6 minutes). This  
7 427 measure includes both messages in the platform and occasional telephone calls relating to the  
8 428 treatment. Mean average telephone time per participant was 3.6 min (SD = 7.1) and median  
9 429 was 0.0 min (IQR: 6.0 min) throughout the treatment.

10  
11  
12  
13 43014  
15 431 **Clinical outcomes**16  
17 432 **Primary outcome measure**

18 433 A series of linear mixed models showed a significant decrease in masked assessor-rated  
19 434 depressive symptoms (CDRS-R) over time for therapist-guided I-BA ( $B = -11.3$ ,  $P < 0.001$ ,  
20 435 95% CI  $-14.9$  to  $-7.7$ ), and self-guided I-BA ( $B = -10.38$ ,  $P < 0.001$ , 95% CI  $-13.93$  to  
21 436  $-6.82$ ), but not for TAU ( $B = -4.40$ ,  $P = 0.077$ , 95% CI  $-9.33$  to  $0.52$ ,  $P > 0.05$ ) (**Table 3** and  
22 437 **Figure 2**). Within-group Cohen's  $d$  was 2.43 (CI 1.66 to 3.20) for therapist-guided I-BA, 2.23  
23 438 (CI 1.47 to 3.00) for self-guided I-BA, and 0.95 (CI  $-0.11$  to 2.01) for TAU.

439 **Table 3.** Means (SD) for the three assessment points presented separately for the three  
 440 groups.  
 441

| Measure                                                                                                                                                                                                                                                  | Therapist-guided I-BA<br>(n = 11) | Self-guided I-BA<br>(n = 10) | TAU<br>(n = 11) |
|----------------------------------------------------------------------------------------------------------------------------------------------------------------------------------------------------------------------------------------------------------|-----------------------------------|------------------------------|-----------------|
| <i>Clinician-rated</i>                                                                                                                                                                                                                                   | Mean (SD) <sup>1</sup>            | Mean (SD)                    | Mean (SD)       |
| CDRS-R                                                                                                                                                                                                                                                   |                                   |                              |                 |
| Pretreatment                                                                                                                                                                                                                                             | 52.2 (9.4)                        | 55.1 (10.2)                  | 53.2 (9.0)      |
| Posttreatment                                                                                                                                                                                                                                            | 34.8 (10.1)                       | 39.0 (12.0)                  | 44.9 (10.0)     |
| Three-month follow-up <sup>2</sup>                                                                                                                                                                                                                       | 29.1 (10.1)                       | 31.6 (11.0)                  | 44.6 (13.6)     |
| <i>Child- and parent-rated</i>                                                                                                                                                                                                                           |                                   |                              |                 |
| SMFQ-A                                                                                                                                                                                                                                                   |                                   |                              |                 |
| Pretreatment                                                                                                                                                                                                                                             | 13.6 (5.4)                        | 13.9 (6.5)                   | 16.8 (6.2)      |
| Posttreatment                                                                                                                                                                                                                                            | 6.2 (5.6)                         | 4.9 (5.5)                    | 12.9 (7.8)      |
| Three-month follow-up                                                                                                                                                                                                                                    | 4.6 (4.5)                         | 8.3 (6.0)                    | 9.6 (5.8)       |
| SMFQ-P                                                                                                                                                                                                                                                   |                                   |                              |                 |
| Pretreatment                                                                                                                                                                                                                                             | 11.6 (5.8)                        | 12.5 (5.9)                   | 15.2 (4.1)      |
| Posttreatment                                                                                                                                                                                                                                            | 7.6 (5.0)                         | 5.5 (4.7)                    | 11.2 (7.2)      |
| Three-month follow-up                                                                                                                                                                                                                                    | 5.7 (4.3)                         | 5.0 (3.6)                    | 9.3 (5.0)       |
| WSAS-A                                                                                                                                                                                                                                                   |                                   |                              |                 |
| Pretreatment                                                                                                                                                                                                                                             | 17.9 (8.7)                        | 13.8 (7.0)                   | 16.1 (5.5)      |
| Posttreatment                                                                                                                                                                                                                                            | 12.0 (6.6)                        | 9.7 (11.2)                   | 15.8 (10.6)     |
| Three-month follow-up                                                                                                                                                                                                                                    | 7.0 (5.4)                         | 5.6 (7.9)                    | 12.9 (10.0)     |
| Abbreviations: TAU = Treatment as usual; CDRS-R = Children's Depression Rating Scale, Revised; SMFQ-A/P = Short version of Mood and Feeling Questionnaire, adolescent and parent version; WSAS-A = Work and Social Adjustment Scale – adolescent Version |                                   |                              |                 |
| <sup>1</sup> Observed means.                                                                                                                                                                                                                             |                                   |                              |                 |
| <sup>2</sup> Primary end point.                                                                                                                                                                                                                          |                                   |                              |                 |

442

443

444

445 *Figure 2 approximately here.*

446

447

448 **Secondary outcome measures**

449 Descriptive statistics on secondary outcome measures are reported in **Table 3** and  
 450 supplementary **Table S2**. A series of linear mixed models showed significant decreases in  
 451 self-rated depressive symptoms (SMFQ-A) for all three groups: therapist-guided I-BA (B  
 452 =−4.4, P < 0.001, 95% CI −6.2 to −2.6), self-guided I-BA (B = −3.39, P < 0.05, 95% CI  
 453 −6.48 to −0.30), and TAU (B =−4.04, P = 0.001, 95% CI −6.22 to −1.86). Within-group  
 454 effect sizes (Cohen's *d*) were 1.45 for therapist-guided I-BA, 1.12 for self-guided I-BA, and  
 455 1.34 for TAU.

1  
2  
3 456

457 Significant decreases were shown for self-rated impaired functioning (WSAS-A) for  
458 therapist-guided I-BA ( $B = -5.24$ ,  $P < 0.001$ , 95% CI  $-7.65$  to  $-2.82$ ) and self-guided I-BA  
459 ( $B = -3.58$ ,  $P < 0.01$ , 95% CI  $-6.08$  to  $-1.10$ ), but not for TAU ( $B = -1.81$ ,  $P = 0.163$ , 95%  
460 CI  $-4.43$  to  $0.80$ ). Within-group Cohen's  $d$  was 1.47 for therapist-guided I-BA, 1.00 for self-  
461 guided I-BA, and 0.51 for TAU.

13 462

463 Significant decreases were shown for parent-rated depressive symptoms (SMFQ-P) for  
464 therapist-guided I-BA ( $B = -2.83$ ,  $P < 0.01$ , 95% CI  $-4.31$  to  $-1.34$ ), self-guided I-BA ( $B$   
465  $= -3.75$ ,  $P < 0.01$ , 95% CI  $-5.65$  to  $-1.85$ ), and for TAU ( $B = -3.29$ ,  $P < 0.01$ , 95% CI  $-5.17$   
466 to  $-1.42$ ). Within-group Cohen's  $d$  was 1.05 for therapist-guided I-BA, 1.40 for self-guided I-  
467 BA, and 1.22 for TAU.

24 468

469 Of the secondary measures, CGAS, ISI, KIDSCREEN-10 (adolescent- and parent-rated)  
470 showed significant improvements in all three groups. Remaining secondary measures (CGI-S,  
471 RCADS-S-A/P, WSAS-P, ARI) showed significant improvements in some, but not all groups.  
472 Means and within-group effects for CGAS, CGI-S, RCADS-S-A/P, KIDSCREEN-10-A/P,  
473 ISI, ARI, and WSAS-P are presented in supplementary **Table S3**.

34 474

### 475 **Treatment response (CGI-I)**

476 At the primary end point, seven participants (64%) in therapist-guided I-BA, six participants  
477 (60%) in self-guided I-BA, and four in TAU (36%) were classified as treatment responders  
478 according to the CGI-I. At the three-month follow-up, 78%, 67%, and 56% no longer fulfilled  
479 criteria for MDD in therapist-guided I-BA, self-guided I-BA, and TAU respectively.

45 480

### 481 **Masking integrity**

482 Masking was unintentionally broken at two follow-up assessments (one in therapist-guided at  
483 posttreatment and one in TAU at three-month follow-up). At posttreatment, the assessors'  
484 guesses were correct 48.2% of the time, and at three-month follow-up, 61.5% of the time.

53 485

55 486

## 487 **Discussion**

488 This feasibility trial, where adolescents with mild to moderate depression were randomised to  
489 therapist-guided I-BA, self-guided I-BA or TAU, evaluated the feasibility of the study design,  
490 the acceptability of the treatments, and provided preliminary clinical efficacy data.

491  
492 Most participants screened positive for two or more diagnoses according to MINI-KID,  
493 indicating that comorbidity was common in this sample. The pace of recruitment was initially  
494 slow but improved substantially when we placed advertisements in local media. Drop-out of  
495 participants was low and data loss acceptable. It was possible to successfully refer all  
496 participants randomised to TAU to their local primary care or CAMHS, and all but one  
497 patient received treatment in these services, though the start of treatment was often delayed.  
498 As expected, TAU was a heterogeneous condition; participants received pharmacological,  
499 psychological, or combination of both interventions. Implications for a future large-scale RCT  
500 include the importance of broad recruitment strategies, such as nationwide participant  
501 inclusion, and close collaboration with clinical services to ensure that participants randomised  
502 to TAU have access to treatment as soon as possible.

503  
504 Overall, both I-BA groups were rated as more credible and more satisfactory than TAU.  
505 However, most families had probably hoped for one of the I-BA groups, which could have  
506 been a factor in the lower ratings for the TAU group. Furthermore, both I-BA treatments  
507 started immediately after randomisation, while some participants in TAU had to wait to start  
508 treatments at their local clinics. This inherent difference between the interventions and  
509 potential dissatisfaction with treatment availability in TAU may have influenced clinical  
510 outcomes. Adherence was lower in the self-guided I-BA group, but clinical outcomes were  
511 similar overall. Whether self-guided I-BA is a viable treatment alternative will be answered in  
512 a larger RCT. The advantages of self-guided interventions are obvious in terms of low costs  
513 and scalability.

514  
515 Previous research has indicated that ICBT is efficacious for adolescent depression[33 34]. To  
516 the best of our knowledge, this is the first trial on online-delivered BA for this age group. Our  
517 results suggest that delivering BA online, with or without therapist-support, could also be a  
518 feasible and potentially effective way of treating depression in adolescents. We found large  
519 within-group effects on clinician-rated depressive symptoms for both I-BA groups. These

1  
2  
3 520 results are consistent with previous trials, where face-to-face BA has been found to be  
4  
5 521 potentially effective for adolescent depression[17-19]. In a small RCT, similar results were  
6  
7 522 found for face-to-face BA and evidence-based practice for depression[73], while in the  
8  
9 523 current trial we found lower effect sizes and response rates in the TAU group. The  
10  
11 524 encouraging results of this feasibility study should nevertheless be considered preliminary,  
12  
13 525 and the relative efficacy of therapist-guided and self-guided I-BA will need to be established  
14  
15 526 in a definitive RCT.

15  
16 527

17 528 This trial has several strengths, including a randomised controlled design, the use of masked  
18  
19 529 assessors, high treatment adherence in the I-BA-groups, the use of an ecologically valid  
20  
21 530 control group, and the careful recording of adverse events. Furthermore, the contents of TAU  
22  
23 531 were carefully assessed and reported. This study also has some limitations. First, while TAU  
24  
25 532 ensures patient safety and allows for comparison to current clinical practice, it is a  
26  
27 533 heterogeneous condition[74], and the nature and quality of TAU will affect results of the  
28  
29 534 larger RCT[75]. Thus, a detailed description of TAU is important for interpreting the results  
30  
31 535 as well as for enabling replication. In this study, we collected information about the content of  
32  
33 536 TAU through medical records and interviewing parents. Both methods are subject to  
34  
35 537 uncertainty, but showed good agreement with each other. Second, generalisability of the  
36  
37 538 results to other settings and locations might be limited. Usual care for adolescents with  
38  
39 539 depression might differ among the regions in Sweden and among different countries and  
40  
41 540 healthcare systems. Third, although clinic referrals were accepted in this trial, all included  
42  
43 541 patients were self-referred, and thus may be less complex and more motivated for ICBT than  
44  
45 542 a clinically-referred sample. However, about a fourth of participants self-referred to the study  
46  
47 543 upon recommendation by a health care provider, and all included patients were diagnosed  
48  
49 544 with major depressive disorder. Fourth, despite our best efforts, masked assessors correctly  
50  
51 545 guessed group allocation more often than they would have by chance. Additional measures,  
52  
53 546 such as employing external masked assessors who are fully unaware of study aims and  
54  
55 547 hypotheses[76] might be needed to improve masking.

51  
52 548

53  
54 549

## 55 550 **Conclusions**

57 551 Both therapist-guided and self-guided I-BA are acceptable and potentially efficacious  
58  
59 552 treatments for adolescents with depression, and TAU is a reasonable and ethically-acceptable  
60

1  
2  
3  
4  
5  
6  
7  
8  
9  
10  
11  
12  
13  
14  
15  
16  
17  
18  
19  
20  
21  
22  
23  
24  
25  
26  
27  
28  
29  
30  
31  
32  
33  
34  
35  
36  
37  
38  
39  
40  
41  
42  
43  
44  
45  
46  
47  
48  
49  
50  
51  
52  
53  
54  
55  
56  
57  
58  
59  
60

553 control condition. In conclusion, it should be feasible to conduct a fully-powered RCT  
554 comparing therapist-guided and self-guided I-BA with TAU, in order to evaluate their relative  
555 efficacy and cost-effectiveness in adolescents with mild to moderate depression.

For peer review only

1  
2  
3 556 **Author statements**  
4

5 557 Contributors  
6

7 558 Authors JA, DMC, FL, EH, ES, and SV designed the study. RG wrote the protocol, was the  
8 project manager, and produced the treatment content with input from JA, ES, and SV. RG,  
9 559 JA, and SV provided the I-BA treatments. Author RG undertook the statistical analyses and  
10 560 wrote the first draft of the manuscript in collaboration with JA. All authors (RG, JA, DMC,  
11 561 FL, EH, CM, HS, MB, ES, and SV) contributed to and have approved the final manuscript.  
12  
13  
14 562  
15  
16 563

17 564 Funding

18 565 This work was supported by the Kavli Trust [grant number 4-3124, 2018] and the Frimurare  
19 566 Barnhuset Trust in Stockholm [2019]. The funding sources had no involvement in study  
20 567 design; collection, analysis, or interpretation of data; writing the report; or deciding to submit  
21 568 the article for publication.  
22  
23  
24  
25  
26 569

27 570 Competing interests

28 571 The authors declare no financial or personal interests that could have influenced the work  
29 572 reported in this paper. Prof. Mataix-Cols reports personal fees from UpToDate, Inc. which  
30 573 was not involved in this work.  
31  
32  
33  
34 574

35 575 Patient consent for publication

36 576 Not required.  
37  
38  
39  
40 577

41 578 Ethics approval

42 579 The study protocol was approved by the Regional Ethical Review Board in Stockholm,  
43 580 Sweden (reference number 2019/03235).  
44  
45  
46  
47 581

48 582 Study protocol

49 583 The study protocol for this feasibility trial is available from the first author upon request.  
50  
51  
52  
53  
54  
55  
56  
57  
58  
59  
60



1  
2  
3 584 Data sharing statement  
4

5 585 The data are pseudonymised according to national (Swedish) and European Union legislation,  
6  
7 586 and cannot be anonymised and published in an open repository. Participants in the trial have  
8  
9 587 not consented for their data to be shared with other international researchers for research  
10 588 purposes.  
11

12 589  
13  
14 590 Acknowledgements

15  
16 591 The authors would like to thank all adolescents and their parents who participated in this  
17  
18 592 study. Thanks also to psychology student Emilia Serlachius and to a former patient of author  
19  
20 593 RG for their valuable input on I-BA treatments. Thanks to colleague Vera Wachtmeister for  
21  
22 594 careful proofreading of the treatment content. The authors are also grateful to all clinicians for  
23  
24 595 assisting with assessments and data collection, and to Semantix who carefully read and  
25  
26 596 proofread this manuscript. This work used the BASS platform for data collection from the  
27  
28 597 eHealth Core Facility at Karolinska Institutet, which is supported by the Strategic Research  
29  
30  
31  
32  
33  
34  
35  
36  
37  
38  
39  
40  
41  
42  
43  
44  
45  
46  
47  
48  
49  
50  
51  
52  
53  
54  
55  
56  
57  
58  
59  
60  
598 Area Healthcare Science (SFO-V).

599 **References**

- 600 1. Depression and other common mental disorders: global health estimates: World Health  
601 Organization, 2017.
- 602 2. Merikangas KR, He JP, Brody D, et al. Prevalence and Treatment of Mental Disorders  
603 Among US Children in the 2001-2004 NHANES. *Pediatrics* 2010;125(1):75-81. doi:  
604 10.1542/peds.2008-2598
- 605 3. Daly M. Prevalence of depression among adolescents in the US from 2009 to 2019:  
606 analysis of trends by sex, race/ethnicity, and income. *J Adolesc Health*  
607 2022;70(3):496-99. doi: 10.1016/j.jadohealth.2021.08.026
- 608 4. Avenevoli S, Swendsen J, He JP, et al. Major depression in the national comorbidity  
609 survey-adolescent supplement: prevalence, correlates, and treatment. *Journal of the*  
610 *American Academy of Child and Adolescent Psychiatry* 2015;54(1):37-44. doi:  
611 10.1016/j.jaac.2014.10.010
- 612 5. Orchard F, Pass L, Marshall T, et al. Clinical characteristics of adolescents referred for  
613 treatment of depressive disorders. *Child and Adolescent Mental Health* 2017;22(2):61-  
614 68. doi: 10.1111/camh.12178
- 615 6. Kessler RC. The costs of depression. *Psychiatr Clin North Am* 2012;35(1):1-14. doi:  
616 10.1016/j.psc.2011.11.005
- 617 7. Jonsson U, Bohman H, Hjern A, et al. Subsequent higher education after adolescent  
618 depression: A 15-year follow-up register study. *Eur Psychiatry* 2010;25(7):396-401.  
619 doi: 10.1016/j.eurpsy.2010.01.016
- 620 8. Jonsson U, Bohman H, Von Knorring L, et al. Mental health outcome of long-term and  
621 episodic adolescent depression: 15-year follow-up of a community sample. *Journal of*  
622 *Affective Disorders* 2011;130(3):395-404. doi: 10.1016/j.jad.2010.10.046
- 623 9. Lewinsohn PM, Rohde P, Klein DN, et al. Natural course of adolescent major depressive  
624 disorder: I. Continuity into young adulthood. *Journal of the American Academy of*  
625 *Child & Adolescent Psychiatry* 1999;38:56-63.
- 626 10. Weissman MM, Wolk S, Goldstein RB, et al. Depressed adolescents grown up. *JAMA*  
627 1999;281(18):1707-13. doi: 10.1001/jama.281.18.1707
- 628 11. Neufeld SAS, Dunn VJ, Jones PB, et al. Reduction in adolescent depression after contact  
629 with mental health services: a longitudinal cohort study in the UK. *The Lancet*  
630 *Psychiatry* 2017;4(2):120-27. doi: 10.1016/s2215-0366(17)30002-0
- 631 12. Weersing VR, Jeffreys M, Do M-CT, et al. Evidence base update of psychosocial  
632 treatments for child and adolescent depression. *Journal of Clinical Child &*  
633 *Adolescent Psychology* 2017;46(1):11-43. doi: 10.1080/15374416.2016.1220310
- 634 13. Socialstyrelsen. National guidelines for depression and anxiety disorder care. Stockholm:  
635 The Swedish National Board of Health and Welfare, 2017.
- 636 14. Hopkins K, Crosland P, Elliott N, et al. Diagnosis and management of depression in  
637 children and young people: summary of updated NICE guidance. *BMJ : British*  
638 *Medical Journal* 2015;350(mar04 9):h824-h24. doi: 10.1136/bmj.h824
- 639 15. Jacobson NS, Martell CR, Dimidjian S. Behavioral activation treatment for depression:  
640 returning to contextual roots. *Clinical psychology (New York, NY)* 2006;8(3):255-70.  
641 doi: 10.1093/clipsy.8.3.255
- 642 16. Ritschel LA, Ramirez CL, Jones M, et al. Behavioral activation for depressed teens: A  
643 pilot study. *Cognitive and Behavioral Practice* 2011;18(2):281-99. doi:  
644 <https://doi.org/10.1016/j.cbpra.2010.07.002>
- 645 17. Ritschel LA, Ramirez CL, Cooley JL, et al. Behavioral activation for major depression in  
646 adolescents: results from a pilot study. *Clinical psychology (New York, NY)*

- 1  
2  
3 647 2016;23(1):39-57. doi: 10.1111/cpsp.12140 [published Online First: Clin Psychol Sci  
4 648 Prac 23: 39-57, 2016]
- 5 649 18. McCauley E, Gudmundsen G, Schloretdt K, et al. The adolescent behavioral activation  
6 650 program: adapting behavioral activation as a treatment for depression in adolescence.  
7 651 *Journal of Clinical Child & Adolescent Psychology* 2016;45(3):1-14. doi:  
8 652 10.1080/15374416.2014.979933
- 9 653 19. Pass L, Lejuez CW, Reynolds S. Brief Behavioural Activation (Brief BA) for Adolescent  
10 654 Depression: A Pilot Study. *Behav Cogn Psychother* 2018;46(2):182-94. doi:  
11 655 10.1017/S1352465817000443 [published Online First: 2017/08/02]
- 12 656 20. American Psychological Association (APA). Clinical practice guideline for the treatment  
13 657 of depression across three age cohorts 2019 [Available from:  
14 658 <https://www.apa.org/depression-guideline> accessed May 3, 2022.
- 15 659 21. National Institute for Health and Care Excellence (NICE). Depression in adults: treatment  
16 660 and management: National Institute for Health and Care Excellence; 2022 [NICE  
17 661 Guideline [NG222]:[Available from: <https://www.nice.org.uk/guidance/ng222>  
18 662 accessed May 1, 2022.
- 19 663 22. Dimidjian S, Barrera M, Martell C, et al. The origins and current status of behavioral  
20 664 activation treatments for depression. *Annu Rev Clin Psychol* 2011;7(1):1-38. doi:  
21 665 10.1146/annurev-clinpsy-032210-104535
- 22 666 23. Cuijpers P, Van Straten A, Andersson G, et al. Psychotherapy for depression in adults: a  
23 667 meta-analysis of comparative outcome studies. *J Consult Clin Psychol*  
24 668 2008;76(6):909-22. doi: 10.1037/a0013075
- 25 669 24. Jacobson NS, et al. A Component Analysis of Cognitive-Behavioral Treatment for  
26 670 Depression. *J Consult Clin Psychol* 1996;64(2):295-304. doi: 10.1037/0022-  
27 671 006X.64.2.295
- 28 672 25. Dimidjian S, Hollon SD, Dobson KS, et al. Randomized trial of behavioral activation,  
29 673 cognitive therapy, and antidepressant medication in the acute treatment of adults with  
30 674 major depression. *J Consult Clin Psychol* 2006;74(4):658-70. doi: 10.1037/0022-  
31 675 006X.74.4.658
- 32 676 26. Weisz JR, McCarty CA, Valeri SM. Effects of psychotherapy for depression in children  
33 677 and adolescents: A meta-analysis. *Psychol Bull* 2006;132(1):132-49. doi:  
34 678 10.1037/0033-2909.132.1.132
- 35 679 27. Tindall L, Mikocka-Walus A, McMillan D, et al. Is behavioural activation effective in the  
36 680 treatment of depression in young people? A systematic review and meta-analysis.  
37 681 *Psychol Psychother* 2017;90(4):770-96. doi: 10.1111/papt.12121
- 38 682 28. Collins KA, Westra HA, Dozois DJA, et al. Gaps in accessing treatment for anxiety and  
39 683 depression: Challenges for the delivery of care. *Clinical Psychology Review*  
40 684 2004;24(5):583-616. doi: 10.1016/j.cpr.2004.06.001
- 41 685 29. Merikangas KR, He J-p, Burstein M, et al. Service utilization for lifetime mental disorders  
42 686 in U.S. adolescents: results of the National Comorbidity Survey-Adolescent  
43 687 Supplement (NCS-A). *Journal of the American Academy of Child and Adolescent*  
44 688 *Psychiatry* 2011;50(1):32-45. doi: 10.1016/j.jaac.2010.10.006 [published Online First:  
45 689 2010/12/03]
- 46 690 30. Essau CA. Frequency and patterns of mental health services utilization among adolescents  
47 691 with anxiety and depressive disorders. *Depress Anxiety* 2005;22(3):130-37. doi:  
48 692 10.1002/da.20115
- 49 693 31. Hedman E, Ljótsson B, Lindfors N. Cognitive behavior therapy via the Internet: a  
50 694 systematic review of applications, clinical efficacy and cost-effectiveness. *Expert Rev*  
51 695 *Pharmacoecon Outcomes Res* 2012;12(6):745-64. doi: 10.1586/erp.12.67
- 52  
53  
54  
55  
56  
57  
58  
59  
60

- 1  
2  
3 696 32. Vigerland S, Lenhard F, Bonnert M, et al. Internet-delivered cognitive behavior therapy  
4 697 for children and adolescents: A systematic review and meta-analysis. *Clin Psychol Rev*  
5 698 2016;50:1-10. doi: 10.1016/j.cpr.2016.09.005 [published Online First: 2016/09/27]  
6 699 33. Topooco N, Berg M, Johansson S, et al. Chat- and internet-based cognitive-behavioural  
7 700 therapy in treatment of adolescent depression: randomised controlled trial. *Bjpsych*  
8 701 *Open* 2018;4(4):199-207. doi: 10.1192/bjo.2018.18  
9 702 34. Topooco N, Byléhn S, Dahlström Nysäter E, et al. Evaluating the Efficacy of Internet-  
10 703 Delivered Cognitive Behavioral Therapy Blended With Synchronous Chat Sessions to  
11 704 Treat Adolescent Depression: Randomized Controlled Trial. *J Med Internet Res*  
12 705 2019;21(11):e13393-e93. doi: 10.2196/13393  
13 706 35. Păsărelu C-R, Dobrean A, Andersson G, et al. Feasibility and clinical utility of a  
14 707 transdiagnostic Internet-delivered rational emotive and behavioral intervention for  
15 708 adolescents with anxiety and depressive disorders. *Internet interventions*  
16 709 2021;26:100479-79. doi: 10.1016/j.invent.2021.100479  
17 710 36. Makarushka MM. Efficacy of an Internet-based intervention targeted to adolescents with  
18 711 subthreshold depression. University of Oregon, 2011.  
19 712 37. Sethi S, Campbell AJ, Ellis LA. The Use of Computerized Self-Help Packages to Treat  
20 713 Adolescent Depression and Anxiety. *Journal of Technology in Human Services*  
21 714 2010;28(3):144-60. doi: 10.1080/15228835.2010.508317  
22 715 38. Sandín B, García-Escalera J, Valiente RM, et al. Clinical utility of an Internet-delivered  
23 716 version of the unified protocol for transdiagnostic treatment of emotional disorders in  
24 717 adolescents (iUP-A): a pilot open trial. *Int J Environ Res Public Health* 2020;17(22)  
25 718 doi: 10.3390/ijerph17228306 [published Online First: 2020/11/14]  
26 719 39. Schmitt JC, Valiente RM, García-Escalera J, et al. Prevention of depression and anxiety in  
27 720 subclinical adolescents: effects of a transdiagnostic Internet-delivered CBT program.  
28 721 *Int J Environ Res Public Health* 2022;19(9):5365. doi: 10.3390/ijerph19095365  
29 722 40. Karyotaki E, Efthimiou O, Miguel C, et al. Internet-Based Cognitive Behavioral Therapy  
30 723 for Depression: A Systematic Review and Individual Patient Data Network Meta-  
31 724 analysis. *JAMA Psychiatry* 2021 doi: 10.1001/jamapsychiatry.2020.4364  
32 725 41. Pennant ME, Loucas CE, Whittington C, et al. Computerised therapies for anxiety and  
33 726 depression in children and young people: A systematic review and meta-analysis.  
34 727 *Behaviour research and therapy* 2015;67:1-18. doi: 10.1016/j.brat.2015.01.009  
35 728 42. Bennett SD, Cuijpers P, Ebert DD, et al. Practitioner review: Unguided and guided self-  
36 729 help interventions for common mental health disorders in children and adolescents: a  
37 730 systematic review and meta-analysis. *Journal of child psychology and psychiatry*  
38 731 2019;60(8):828-47. doi: 10.1111/jcpp.13010  
39 732 43. Vigerland S, Ljótsson B, Thulin U, et al. Internet-delivered cognitive behavioural therapy  
40 733 for children with anxiety disorders: A randomised controlled trial. *Behaviour*  
41 734 *Research and Therapy* 2016;76:47-56. doi: 10.1016/j.brat.2015.11.006  
42 735 44. Jolstedt M, Wahlund T, Lenhard F, et al. Efficacy and cost-effectiveness of therapist-  
43 736 guided internet cognitive behavioural therapy for paediatric anxiety disorders: a  
44 737 single-centre, single-blind, randomised controlled trial. *Lancet Child Adolesc Health*  
45 738 2018;2(11):792-801. doi: 10.1016/s2352-4642(18)30275-x [published Online First:  
46 739 2018/09/23]  
47 740 45. Diagnostic and statistical manual of mental disorders: DSM-5. Fifth edition ed.  
48 741 Washington, DC: American Psychiatric Publishing 2013.  
49 742 46. Arjadi R, Nauta MH, Bockting CLH. Acceptability of internet-based interventions for  
50 743 depression in Indonesia. *Internet interventions* 2018;13:8-15. doi:  
51 744 10.1016/j.invent.2018.04.004 [published Online First: 2018/09/13]  
52  
53  
54  
55  
56  
57  
58  
59  
60

- 1  
2  
3 745 47. Dhand N, Khatkar M. Statulator 2014 [Available from: [www.statulator.com](http://www.statulator.com) accessed  
4 746 October 15, 2022.
- 5 747 48. Pass L, Hodgson E, Whitney H, et al. Brief behavioral Activation treatment for depressed  
6 748 adolescents delivered by nonspecialist clinicians: a case Illustration. *Cognitive and*  
7 749 *Behavioral Practice* 2018;25(2):208-24. doi: 10.1016/j.cbpra.2017.05.003
- 8 750 49. Kanter JW, Manos RC, Bowe WM, et al. What is behavioral activation? A review of the  
9 751 empirical literature. *Clinical psychology review* 2010;30(6):608-20. doi:  
10 752 10.1016/j.cpr.2010.04.001
- 11 753 50. Martin F, Oliver T. Behavioral activation for children and adolescents: a systematic  
12 754 review of progress and promise. *Eur Child Adolesc Psychiatry* 2019;28(4):427-41.  
13 755 doi: 10.1007/s00787-018-1126-z
- 14 756 51. Barlow DH. Clinical handbook of psychological disorders: a step-by-step treatment  
15 757 manual. 6 ed. New York: Guilford Publications 2021.
- 16 758 52. Webster-Stratton C, Herman KC. The Impact of Parent Behavior-Management Training  
17 759 on Child Depressive Symptoms. *J Couns Psychol* 2008;55(4):473-84. doi:  
18 760 10.1037/a0013664
- 19 761 53. Sheehan DV, Sheehan KH, Shytle RD, et al. Reliability and Validity of the Mini  
20 762 International Neuropsychiatric Interview for Children and Adolescents (MINI-KID).  
21 763 *The Journal of Clinical Psychiatry* 2010;71(03):313-26. doi:  
22 764 10.4088/JCP.09m05305whi
- 23 765 54. Gratz K. Measurement of Deliberate Self-Harm: Preliminary Data on the Deliberate Self-  
24 766 Harm Inventory. *Journal of Psychopathology and Behavioral Assessment*  
25 767 2001;23(4):253-63. doi: 10.1023/A:1012779403943
- 26 768 55. Larsen DL, Attkisson CC, Hargreaves WA, et al. Assessment of client/patient satisfaction:  
27 769 Development of a general scale. *Eval Program Plann* 1979;2(3):197-207. doi:  
28 770 10.1016/0149-7189(79)90094-6
- 29 771 56. Rozental A, Kottorp A, Forsström D, et al. The Negative Effects Questionnaire:  
30 772 psychometric properties of an instrument for assessing negative effects in  
31 773 psychological treatments. *Behav Cogn Psychother* 2019;47(5):559-72. doi:  
32 774 10.1017/S1352465819000018 [published Online First: 2019/03/15]
- 33 775 57. Horvath AO, Greenberg LS. Development and validation of the working alliance  
34 776 inventory. *J Couns Psychol* 1989;36:223-33. doi: 10.1037/0022-0167.36.2.223
- 35 777 58. Poznanski E, Mokros, H. Children's depression rating scale-revised (CDRS-R). Los  
36 778 Angeles, CA: Western Psychological Services 2001.
- 37 779 59. Shaffer D, Gould MS, Brasic J, et al. A Children's Global Assessment Scale (CGAS).  
38 780 *Archives of General Psychiatry* 1983;40(11):1228-31. doi:  
39 781 10.1001/archpsyc.1983.01790100074010
- 40 782 60. Busner J, Targum SD. The clinical global impressions scale: applying a research tool in  
41 783 clinical practice. *Psychiatry (Edmont (Pa : Township))* 2007;4(7):28.
- 42 784 61. Angold A, Costello, E. J., Messer, S. C., & Pickles, A. . The development of a short  
43 785 questionnaire for use in epidemiological studies of depression in children and  
44 786 adolescents. *Int J Methods Psychiatr Res* 1995; 5:237 - 49.
- 45 787 62. Jarbin H, Ivarsson T, Andersson M, et al. Screening efficiency of the Mood and Feelings  
46 788 Questionnaire (MFQ) and Short Mood and Feelings Questionnaire (SMFQ) in  
47 789 Swedish help seeking outpatients. *PLoS One* 2020;15(3):e0230623-e23. doi:  
48 790 10.1371/journal.pone.0230623
- 49 791 63. Jassi A, Lenhard F, Krebs G, et al. The Work and Social Adjustment Scale, Youth and  
50 792 Parent Versions: Psychometric Evaluation of a Brief Measure of Functional  
51 793 Impairment in Young People. *Child Psychiatry Hum Dev* 2020;51(3):453-60. doi:  
52 794 10.1007/s10578-020-00956-z

- 1  
2  
3 795 64. Ebesutani C, Reise SP, Chorpita BF, et al. The revised child anxiety and depression scale-  
4 796 short version: scale reduction via exploratory bifactor modeling of the broad anxiety  
5 797 factor. *Psychol Assess* 2012;24(4):833-45. doi: 10.1037/a0027283 [published Online  
6 798 First: 2012/02/15]
- 7 799 65. Ravens-Sieberer U, Erhart M, Rajmil L, et al. Reliability, construct and criterion validity  
8 800 of the KIDSCREEN-10 score: a short measure for children and adolescents' well-  
9 801 being and health-related quality of life. *Qual Life Res* 2010;19(10):1487-500. doi:  
10 802 10.1007/s11136-010-9706-5
- 11 803 66. Bastien CH, Vallières A, Morin CM. Validation of the Insomnia Severity Index as an  
12 804 outcome measure for insomnia research. *Sleep Med* 2001;2(4):297-307. doi:  
13 805 10.1016/S1389-9457(00)00065-4
- 14 806 67. Stringaris A, Goodman R, Ferdinando S, et al. The Affective Reactivity Index: A Concise  
15 807 Irritability Scale for Clinical and Research Settings. *Journal of Child Psychology and*  
16 808 *Psychiatry* 2012;53(11):1109-17. doi: 10.1111/j.1469-7610.2012.02561.x
- 17 809 68. Manos RC, Kanter JW, Luo W. The Behavioral Activation for Depression Scale-Short  
18 810 Form: Development and Validation. *Behav Ther* 2011;42(4):726-39. doi:  
19 811 10.1016/j.beth.2011.04.004
- 20 812 69. Basoglu M, Marks I, Livanou M, et al. Double-blindness procedures, rater blindness, and  
21 813 ratings of outcome: observations from a controlled trial. *Archives of General*  
22 814 *Psychiatry* 1997;54(8):744-48. doi: 10.1001/archpsyc.1997.01830200078011
- 23 815 70. Muth C, Bales KL, Hinde K, et al. Alternative models for small samples in psychological  
24 816 research: applying linear mixed effects models and generalized estimating equations to  
25 817 repeated measures data. *Educ Psychol Meas* 2015;76(1):64-87. doi:  
26 818 10.1177/0013164415580432
- 27 819 71. Lane P. Handling drop-out in longitudinal clinical trials: a comparison of the LOCF and  
28 820 MMRM approaches. *Pharm Stat* 2008;7(2):93-106. doi:  
29 821 <https://doi.org/10.1002/pst.267>
- 30 822 72. Feingold A. Effect sizes for growth-modeling analysis for controlled clinical trials in the  
31 823 same metric as for classical analysis. *Psychol Methods* 2009;14(1):43-53. doi:  
32 824 10.1037/a0014699
- 33 825 73. McCauley E, Gudmundsen G, Schloredt K, et al. The Adolescent Behavioral Activation  
34 826 Program: Adapting Behavioral Activation as a Treatment for Depression in  
35 827 Adolescence. *J Clin Child Adolesc Psychol* 2016;45(3):291-304. doi:  
36 828 10.1080/15374416.2014.979933 [published Online First: 2015/01/21]
- 37 829 74. Freedland KE, Mohr DC, Davidson KW, et al. Usual and unusual care: existing practice  
38 830 control groups in randomized controlled trials of behavioral interventions. *Psychosom*  
39 831 *Med* 2011;73(4):323-35. doi: 10.1097/PSY.0b013e318218e1fb
- 40 832 75. Watts SE, Turnell A, Kladnitski N, et al. Treatment-as-usual (TAU) is anything but usual:  
41 833 A meta-analysis of CBT versus TAU for anxiety and depression. *Journal of Affective*  
42 834 *Disorders* 2015;175:152-67. doi: <https://doi.org/10.1016/j.jad.2014.12.025>
- 43 835 76. Mataix-Cols D, Andersson E. Ten Practical Recommendations for Improving Blinding  
44 836 Integrity and Reporting in Psychotherapy Trials. *JAMA Psychiatry* 2021;78(9):943-44.  
45 837 doi: 10.1001/jamapsychiatry.2021.1419  
46 838  
47 839

1  
2  
3 840 **Figure legends**

4 841

5  
6 842 **Figure 1**

7 843 *Note.* Consolidated Standards of Reporting Trials flow diagram.

8  
9 844 Abbreviations: CBT = Cognitive Behavioural Therapy; I-BA = Internet-delivered behavioural  
10  
11 845 activation; CAMHS = Children and Adolescent Mental Healthcare Services

12  
13 846

14 847 **Figure 2**

15  
16 848 *Note.* Graphical representation of the CDRS-R Total score across the three  
17  
18 849 assessment points. Primary endpoint is the three-month follow-up.

19 850 3FU = three-month follow-up; CDRS-R = Children's Depression Rating Scale

20  
21 851 – Revised.

22  
23 852

24  
25 853 **Figure S1**

26 854 *Note.* All screenshots in this figure are published with permission from the principal  
27  
28 855 investigator Eva Serlachius, responsible for development of the platform, and the illustrator  
29  
30 856 Magnus Marklund.

Figure 1

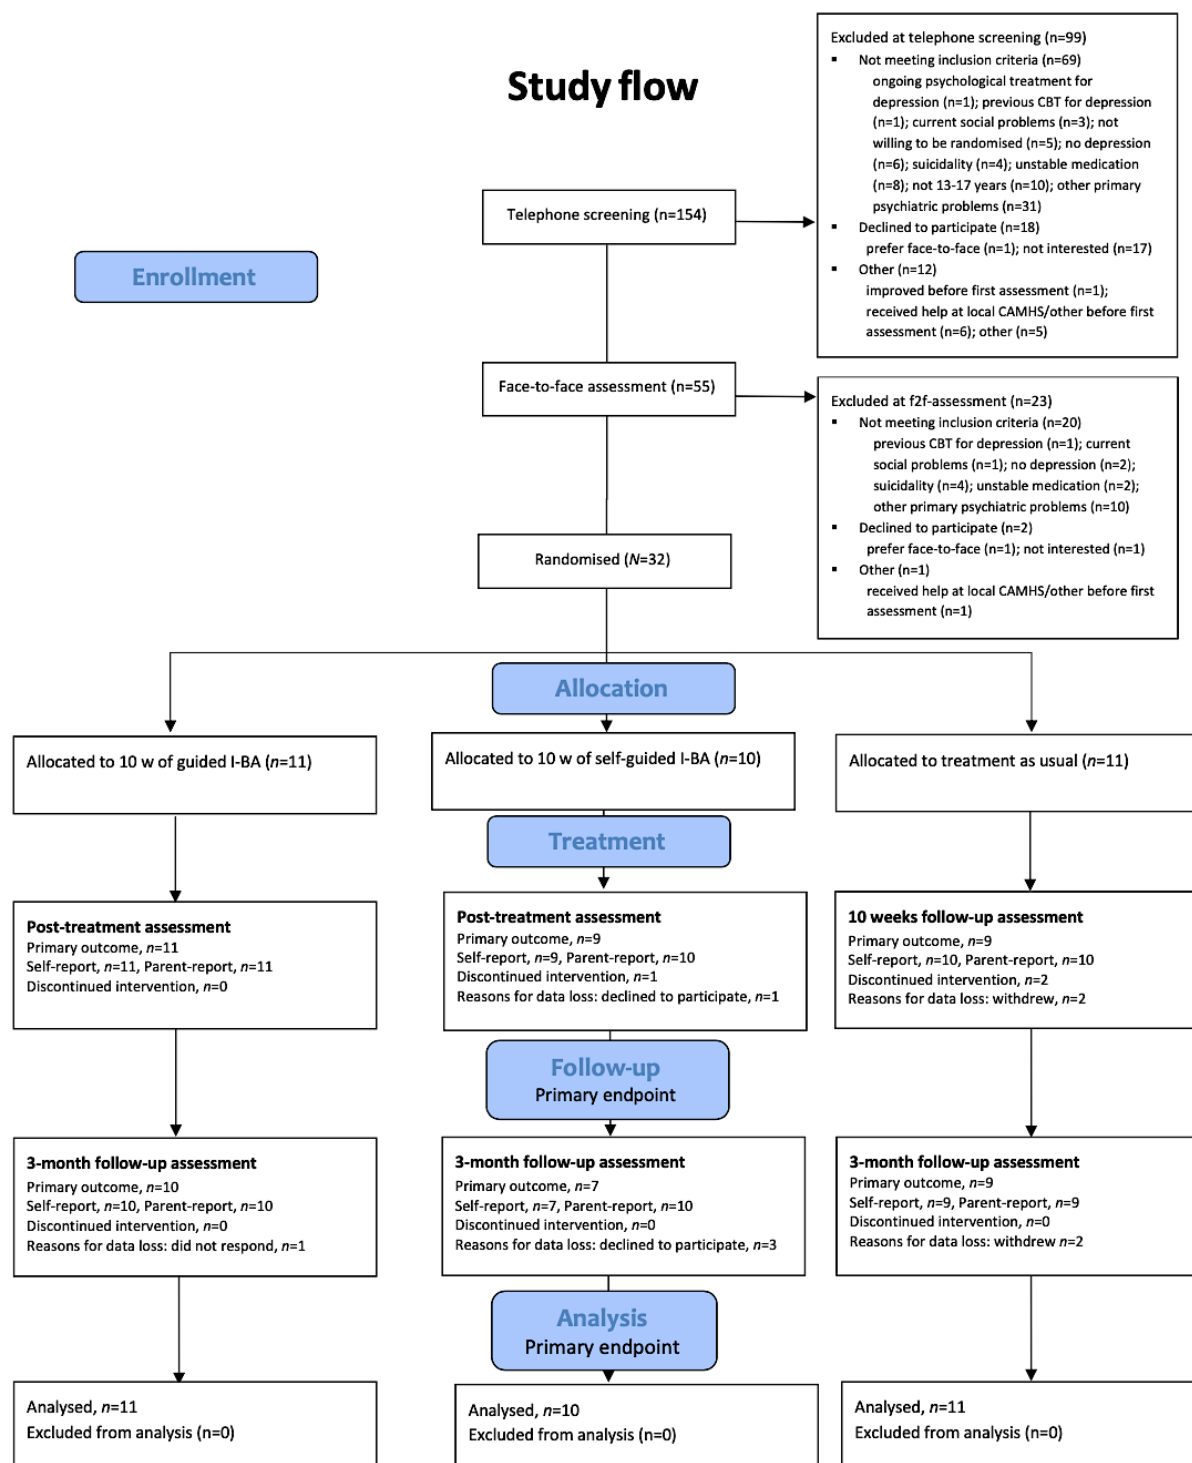



1  
2  
3  
4  
5  
6  
7  
8  
9  
10  
11  
12  
13  
14  
15  
16  
17  
18  
19  
20  
21  
22  
23  
24  
25  
26  
27  
28  
29  
30  
31  
32  
33  
34  
35  
36  
37  
38  
39  
40  
41  
42  
43  
44  
45  
46  
47  
48  
49  
50  
51  
52  
53  
54  
55  
56  
57  
58  
59  
60

### Figure 2

*Changes in CDRS-R score over time for each group*

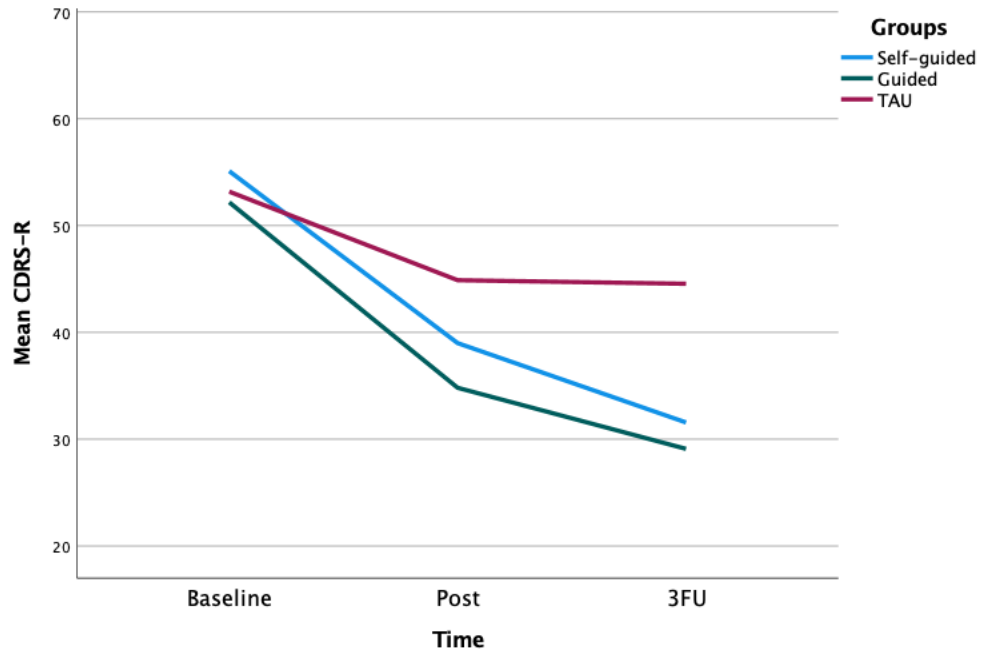

review only

## Supplementary material 1: Additional information about the measures used in this study

Swedish translations of all measures were used in the current study. Unless otherwise stated, there are no specific validation studies in Swedish.

### Measures of acceptability of I-BA

#### *Treatment credibility – adolescent and parent versions*

This measure includes four qualitative questions about treatment credibility, asking how well the treatment suits adolescents with depression, how much they believe this treatment will help them, to what extent they would recommend this treatment to a friend with depression, and how much they expect to improve from the treatment. Each item is scored on a 5-point Likert scale from 1–5, total range 4–20 with higher values indicating higher credibility.

#### *Client Satisfaction Questionnaire (CSQ) – adolescent and parent version*

CSQ[1] measures various aspects of satisfaction with treatment, e.g., perception of quality of treatment, if the treatment adequately addressed their needs and overall satisfaction. CSQ has eight self-rated items on a 4-point scale from 1–4, total range 8–32 with higher values indicating greater satisfaction). The scale has high internal consistency and correlates with therapists' estimates of client satisfaction[1].

#### *Negative Effects Questionnaire-20 (NEQ-20) – adolescent and parent version*

NEQ-20 is a condensed version of the original 32 item self-report questionnaire<sup>[2]</sup> for monitoring and reporting treatment related adverse and unwanted events such as not having confidence in one's treatment or that unpleasant memories have resurfaced. The questionnaire uses a 5-point Likert-scale ranging from 0 ("not at all") to 4 ("extremely") and includes an open question at the end about other possible negative or adverse events. Total range is 0–80 with higher values indicating more reported adverse events. In a psychometric evaluation, the Swedish version of NEQ-32 was found to have good internal consistency[2]. In another Swedish study, NEQ-20 did not demonstrate any bias in terms of responders' sociodemographic background and showed comparable validity for a condensed scale of 20 instead of 32 items[3].

1  
2  
3 *Working alliance inventory, 6 items (WAI-6) – adolescent and parent version*

4 WAI measures a participant's perceived working alliances with her/his therapist. WAI-6 was  
5 developed from the original 36-item WAI[4] and is rated on a 7-point Likert-scale from 1–7,  
6 total range 6–42 with higher values indicating stronger working alliances. In self-guided  
7 ICBT, the word “therapist” was changed to “programme”.

11  
12  
13 **Measures of clinical outcomes**

14 *Children's Depression Rating Scale, Revised (CDRS-R)*

15 CDRS-R[5] is the most widely-used rating scale in clinical trials for assessing severity of  
16 depression and change in depressive symptoms with children and adolescents[5-7]. CDRS-R  
17 is a semi-structured interview-based measure modelled on the adult Hamilton Rating Scale for  
18 Depression. Item values range from 1–5 or 1–7, total range 17–113 with higher scores  
19 indicating more clinically significant difficulties. A raw score of  $\geq 40$  is indicative of  
20 depression, while a score of  $\leq 28$  is often used to define remission (minimal or no  
21 symptoms)[7]. CDRS-R has shown good internal consistency and good construct validity and  
22 is also considered a good measure of symptom change[7].

23  
24  
25  
26  
27  
28  
29  
30  
31  
32 *Children's Global Assessment Scale (CGAS)*

33 CGAS[8] is a single-item scale from 1–100 that integrates psychological, social, and  
34 academic functioning in children as a measure of global functioning. The questionnaire is  
35 assessor-rated and has established validity and reliability[9].

36  
37  
38  
39  
40  
41 *Clinical Global Impression Scale – Severity (CGI-S)*

42 CGI-S[10] is a single-item clinician rating of symptom severity for a specific disorder.  
43 Ratings are made on a seven-point scale range from 1 (“no symptoms”) to 7 (“extreme  
44 symptoms”). CGI correlates well with established outcomes scales such as Hamilton Rating  
45 Scale for Depression and Brief Psychiatric Rating Scale[11].

46  
47  
48  
49  
50  
51  
52 *Clinical Global Impression Scale – Improvement (CGI-I)*

53 CGI-I[10] provides a clinician-rated opinion of global improvement. The measure consists of  
54 a single item about the level of improvement compared to state at admission, which is rated  
55 on a seven-point scale (1=very much improved, 2=much improved, 3=minimally improved,  
56 4=no change, 5=minimally worse, 6=much worse, 7=very much worse). The questionnaire  
57  
58  
59  
60

1  
2  
3 has established validity and reliability[11]. Treatment response is commonly defined as a  
4 score of 1 (very much improved) or 2 (much improved)[12].  
5  
6  
7

8  
9 *Need for further treatment – adolescent and parent version*

10 This non-validated single-item questionnaire was created by David Mataix-Cols' research  
11 team, and it asks whether the participant considers her/himself in need of further treatment  
12 for her/his depression. The item is scored on a scale from 0 (no need for further treatment) to  
13 4 (extensive need for further treatment).  
14  
15  
16

17  
18  
19 *Short Mood and Feelings Questionnaire (SMFQ) – adolescent and parent version*

20 SMFQ[13] is a 13-item self-reported measure of depressive symptoms. Each item is scored on  
21 a 3-point scale (0 = not true, 1 = sometimes, 2 = true), total range 0–26 with higher values  
22 indicating more depressive symptoms. The total score is derived by summing together the  
23 values for each 13 items. The questionnaire has established validity and reliability[13 14].  
24 According to a Swedish study, SMFQ is, with gender-based cut-offs, efficient as a screening  
25 tool in clinical adolescent populations, but not in children[15].  
26  
27  
28  
29  
30  
31

32  
33 *Work and Social Adjustment Scale (WSAS) – adolescent and parent version*

34 WSAS is a 5-item child-rated scale of impaired functioning in school, everyday life, friends  
35 and social life, recreation, hobbies, family and close relationships and was adapted from the  
36 Work and Social Adjustment Scale[16 17]. Each item is scored on a 9-point Likert scale of 0–  
37 8, total score 0–40 with higher scores indicating greater impairment. In an evaluation of the  
38 Swedish translation of this scale, WSAS showed excellent internal consistency, adequate test-  
39 retest reliability and good convergent and divergent validity. WSAS is highly sensitive to  
40 change after treatment[17].  
41  
42  
43  
44  
45  
46  
47

48  
49 *Revised Children's Anxiety and Depression Scale – Short Version (RCADS-S) – adolescent  
50 and parent version*

51 RCADS-S[18] is a shortened version of the Spence Child Anxiety Scale, which is an  
52 adolescent and parent self-report measure of anxiety- and depression-related  
53 psychopathology. Only the anxiety subscales were administered, since depression is measured  
54 thoroughly by other measures. After eliminating the depression subscale, RCADS-S-C  
55 consists of 15 items, reflecting a single “broad anxiety” dimension. The four-graded scale  
56  
57  
58  
59  
60

1  
2  
3 ranges from 0 = “Never” to 3 = “Always”, total range 0–45 with higher scores indicating  
4 more anxiety symptoms. The 15-item Anxiety Total scale in the shortened version of RCADS  
5 has shown significant correspondence with anxiety diagnostic groups based on structured  
6 clinical interviews[18].  
7  
8  
9

#### 10 11 *KIDSCREEN-10 Index – adolescent and parent version*

12 The KIDSCREEN-10 Index[19] was developed from the longer KIDSCREEN-52 and is  
13 considered a valid measure for assessing an adolescent’s general health-related quality of life.  
14 KIDSCREEN-10 consists of 10 items, each with a 5-level response category (1–5) and an  
15 additional question about general health. Total range is 10–50 with higher values indicating  
16 better health-related quality of life.  
17  
18  
19  
20  
21  
22

#### 23 *Insomnia Severity Index (ISI)*

24 ISI[20] is brief screening measure of insomnia on a seven-item scale, each item scored 0–4,  
25 total range 0–28 points with higher values indicating more sleep disturbances. The scale is  
26 reliable and sensitive to change[20].  
27  
28  
29  
30  
31

#### 32 *Affective Reactivity Index (ARI)*

33 ARI[21] is measure of irritability that consists of six items on a scale of three (0–2) and one  
34 item on impairment due to irritability, total range 0–12 points with higher values indicating  
35 more irritability. ARI has been demonstrated to have excellent internal consistency and  
36 differentiated cases from controls in a clinic a community sample[21].  
37  
38  
39  
40  
41

#### 42 *Behavioral Activation of Depression Scale – short form (BADS-SF)*

43 BADS-SF is a 9-item self-report measure designed to track changes in proposed mediators of  
44 BA (activation and avoidance)[22]. Each item is scored from 0 (not at all) to 6 (completely),  
45 total score 0–54 with higher values indicating higher degree of activation and lower degree of  
46 avoidance. BADS-SF has two subscales, activation (focused, goal-directed activation and  
47 completion of scheduled activities) and avoidance/rumination (avoidance of negative aversive  
48 states and engaging in rumination rather than active problem solving). BADS-SF has  
49 acceptable internal consistency reliability, construct and predictive validity[22].  
50  
51  
52  
53  
54  
55  
56  
57  
58  
59  
60

## References

1. Larsen DL, Attkisson CC, Hargreaves WA, et al. Assessment of client/patient satisfaction: Development of a general scale. *Eval Program Plann* 1979;2(3):197-207. doi: 10.1016/0149-7189(79)90094-6
2. Alexander R, Anders K, Johanna B, et al. Negative Effects of Psychological Treatments: An Exploratory Factor Analysis of the Negative Effects Questionnaire for Monitoring and Reporting Adverse and Unwanted Events. *PLoS One* 2016;11(6):e0157503. doi: 10.1371/journal.pone.0157503
3. Rozentel A, Kottorp A, Forsström D, et al. The Negative Effects Questionnaire: psychometric properties of an instrument for assessing negative effects in psychological treatments. *Behav Cogn Psychother* 2019;47(5):559-72. doi: 10.1017/S1352465819000018 [published Online First: 2019/03/15]
4. Horvath AO, Greenberg LS. Development and validation of the Working Alliance Inventory. *J Couns Psychol* 1989;36:223-33. doi: 10.1037/0022-0167.36.2.223
5. Poznanski E, Mokros, H. Children's depression rating scale-revised (CDRS-R). Los Angeles, CA: Western Psychological Services 2001.
6. Poznanski EO, Cook SC, Carroll BJ. A depression rating scale for children. *Pediatrics* 1979;64(4):442.
7. Mayes TL, Bernstein IH, Haley CL, et al. Psychometric Properties of the Children's Depression Rating Scale-Revised in Adolescents. *J Child Adolesc Psychopharmacol* 2010;20(6):513-16. doi: 10.1089/cap.2010.0063
8. Shaffer D, Gould MS, Brasic J, et al. A Children's Global Assessment Scale (CGAS). *Archives of General Psychiatry* 1983;40(11):1228-31. doi: 10.1001/archpsyc.1983.01790100074010
9. Green B, Shirk S, Hanze D, et al. The Children's Global Assessment Scale in clinical practice: an empirical evaluation. *Journal of the American Academy of Child and Adolescent Psychiatry* 1994;33(8):1158. doi: 10.1097/00004583-199410000-00011
10. Guy W. ECDEU assessment manual for psychopharmacology: US Department of Health, and Welfare 1976:534-537.
11. Busner J, Targum SD. The clinical global impressions scale: applying a research tool in clinical practice. *Psychiatry (Edmont (Pa : Township))* 2007;4(7):28.
12. McCauley E, Gudmundsen G, Schloretdt K, et al. The Adolescent Behavioral Activation Program: Adapting Behavioral Activation as a Treatment for Depression in Adolescence. *J Clin Child Adolesc Psychol* 2016;45(3):291-304. doi: 10.1080/15374416.2014.979933 [published Online First: 2015/01/21]
13. Angold A, Costello, E. J., Messer, S. C., & Pickles, A. . The development of a short questionnaire for use in epidemiological studies of depression in children and adolescents. *Int J Methods Psychiatr Res* 1995; 5:237 - 49.
14. Daviss WB, Birmaher B, Melhem NA, et al. Criterion Validity of the Mood and Feelings Questionnaire for Depressive Episodes in Clinic and Non-Clinic Subjects. *Journal of Child Psychology and Psychiatry* 2006;47(9):927-34. doi: 10.1111/j.1469-7610.2006.01646.x
15. Jarbin H, Ivarsson T, Andersson M, et al. Screening efficiency of the Mood and Feelings Questionnaire (MFQ) and Short Mood and Feelings Questionnaire (SMFQ) in Swedish help seeking outpatients. *PLoS One* 2020;15(3):e0230623-e23. doi: 10.1371/journal.pone.0230623

16. Mundt JC, Marks IM, Shear MK, et al. The Work and Social Adjustment Scale: a simple measure of impairment in functioning. *The British journal of psychiatry : the journal of mental science* 2002;180:461.
17. Jassi A, Lenhard F, Krebs G, et al. The Work and Social Adjustment Scale, Youth and Parent Versions: Psychometric Evaluation of a Brief Measure of Functional Impairment in Young People. *Child Psychiatry Hum Dev* 2020;51(3):453-60. doi: 10.1007/s10578-020-00956-z
18. Ebesutani C, Reise SP, Chorpita BF, et al. The revised child anxiety and depression scale-short version: scale reduction via exploratory bifactor modeling of the broad anxiety factor. *Psychol Assess* 2012;24(4):833-45. doi: 10.1037/a0027283 [published Online First: 2012/02/15]
19. Ravens-Sieberer U, Erhart M, Rajmil L, et al. Reliability, construct and criterion validity of the KIDSCREEN-10 score: a short measure for children and adolescents' well-being and health-related quality of life. *Qual Life Res* 2010;19(10):1487-500. doi: 10.1007/s11136-010-9706-5
20. Bastien CH, Vallières A, Morin CM. Validation of the Insomnia Severity Index as an outcome measure for insomnia research. *Sleep Med* 2001;2(4):297-307. doi: 10.1016/S1389-9457(00)00065-4
21. Stringaris A, Goodman R, Ferdinando S, et al. The Affective Reactivity Index: A Concise Irritability Scale for Clinical and Research Settings. *Journal of Child Psychology and Psychiatry* 2012;53(11):1109-17. doi: 10.1111/j.1469-7610.2012.02561.x
22. Manos RC, Kanter JW, Luo W. The Behavioral Activation for Depression Scale-Short Form: Development and Validation. *Behav Ther* 2011;42(4):726-39. doi: 10.1016/j.beth.2011.04.004

## Figure S1

### Screenshots of I-BA treatment

1. To the left: Overview and start page, with list of chapters (BIP Depression). To the right: A psychoeducative video about depression.

Startside

Startside Meddelanden Mina svar Ladda ner Vanliga frågor

Startside

| Del                                         | Antal steg | För vem? | Utförd                     |
|---------------------------------------------|------------|----------|----------------------------|
| Kapitel 1: Om depression                    | 23         | Ungdom   | 2019-09-07 Starta Översikt |
| Kapitel 2: Värden, mål och dina första steg | 28         | Ungdom   | 2019-09-07 Starta Översikt |
| Kapitel 3: Fortsätta steg och om sömn       | 17         | Ungdom   | 2019-09-07 Starta Översikt |
| Kapitel 4: Undvikandefällan                 | 19         | Ungdom   | Ej utförd Starta Översikt  |
| Kapitel 5: Skifta fokus                     | 18         | Ungdom   | Ej utförd Starta Översikt  |
| Kapitel 6: Lös problem                      | 20         | Ungdom   | Ej utförd Starta Översikt  |
| Kapitel 7: Slutspurten                      | 12         | Ungdom   | Ej utförd Starta Översikt  |
| Kapitel 8: Utvärdera och planera framåt     | 19         | Ungdom   | Ej utförd Starta Översikt  |

STEG 7 AV 24

Se filmen om depression

Hur många?  
Depression?  
Varför?

04:12

Tillbaka Nästa



2. To the left: An exercise about the avoidance trap. To the right: The three fictional characters sharing their treatment goals.

STEG 9 AV 19

### Undvikandefällan - hmm...

Det är alltså väldigt mänskligt att undvika jobbiga situationer och känslor. Och när man är deprimerad är det lätt hänt att undvikandet blir ett mönster. Nu är vi nyfikna på att höra vad du tänker om filmen!



Spara

**Det:** Kapitel 4: Undvikandefällan  
**Steg:** Undvikandefällan - hmm...  
**Senast uppdaterad:** 07 Sep 2019 20:13

Kan du känna igen dig i att du ibland hamnar i undvikandefällan? Om ja, på vilket sätt? Om nej, vad är det du inte känner igen?

Vad tror du, hänger undvikande och depression ihop för dig?

Spara

Här kan du och din behandlare skicka meddelanden till varandra

Rebecca Grudin

Skicka



Kapitel 2: Värderna, mål och dina första steg ✕

Startsida

STEG 18 AV 28

## Exempel på behandlingsmål

Det är som sagt bra att ha mål med behandlingen i BiP. Målen beskriver vad du vill försöka klara av under behandlingen och vad som är viktigt för dig.

Här kan du se vilka mål Noomi, Amin & Molly har för sina behandlingar!



Noomi - stressad över skolan, vill inte lasta föräldrarna, ledsen och vilar mycket



Här är Noomis mål för behandlingen:

- Börja dansa regelbundet igen.
- Träffa kompisar varje helg.
- Plugga på bestämda tider, senast till kl 19 vardagkvällar och inte på helger.

< Tillbaka

Nästa >

3. To the left: The app that adolescents use for doing home assignments between chapters. To the right: Written information to the caregivers about how to validate your adolescent's emotions.

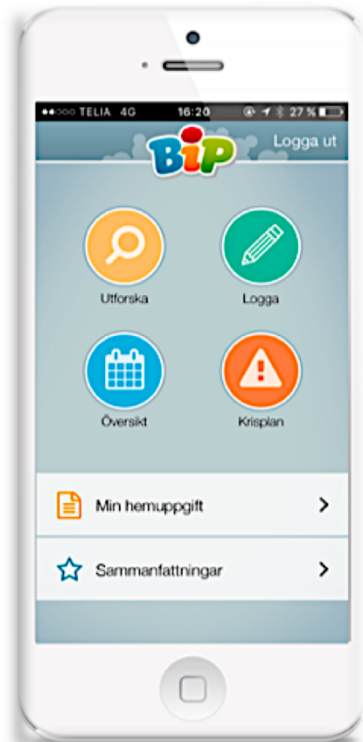

BIP
Startsida

STEG 12 AV 17

## Bekräfta - vad, när, hur?

- Vad? >
- När? >
- Hur? >
- Exempel >
- Bekräfta känslan, inte handlingen >

Att bekräfta någon betyder inte nödvändigtvis att du gillar eller håller med om vad personen gör (t ex ställer in med kompisar) eller att det hen upplever är sant (t ex "jag är hopplös"). Du bekräftar däremot att den andre känner vad den känner i en viss situation, och att det är begripligt.

Det går ofta att bekräfta känslan utan att samtidigt bekräfta att det är en bra idé att strunta i handlingen.

< Tillbaka
Nästa >

1  
2  
3 4. Encrypted messaging function which is included in guided I-BA. The psychologist responds within 1-2 days on weekdays to messages from  
4 the participant.  
5  
6

7  
8  
9  
10  
11  
12  
13  
14  
15  
16  
17  
18  
19  
20  
21  
22  
23  
24  
25  
26  
27  
28  
29  
30  
31  
32  
33  
34  
35  
36  
37  
38  
39  
40  
41  
42  
43  
44  
45  
46

Inloggad som: bipticdemo [Logga ut](#)

**BIP**

[Startsida](#)

[Startsida](#) [Meddelanden](#) [Mina svar](#) [Ladda ner](#) [Vanliga frågor](#)

## Meddelanden

[Inkorg](#) [Nytt meddelande](#) [Skickade](#) [Utkast](#)

Behandlare: Per Andrén

Angående:

Skriv meddelande:

[Spara som utkast](#) [Skicka](#)

Barn- och ungdomspsykiatri  
STOCKHOLMS LÄNS LÄNSSTING

[Om Cookies »](#)

**Table S1a.** TAU content, including details on treatment type, intensity and provider according to interviews with parents

| ID | Medications / Indication                 | No. of visits, incl initial psychiatric assessment | Psychological or psychosocial treatment | No. of sessions                    | Other intervention (no. visits) | Comments                                                                         |
|----|------------------------------------------|----------------------------------------------------|-----------------------------------------|------------------------------------|---------------------------------|----------------------------------------------------------------------------------|
| 1  | Antidepressant (SSRI, 25 mg Sertraline)  | –                                                  | CBT                                     | 5 sessions of CBT                  | –                               |                                                                                  |
| 2  | Antidepressant (SSRI, Fluoxetine, 20 mg) | –                                                  | Supportive therapy                      | 1–2 sessions of supportive therapy | –                               |                                                                                  |
| 3  | –                                        | 2 visits (psychiatric assessment only)             | –                                       | –                                  | –                               | No intervention was offered after the psychiatric assessment due to improvement. |
| 4  | Melatonin                                | –                                                  | CBT                                     | 10 sessions of CBT                 | –                               |                                                                                  |
| 5  | Melatonin + Vitamin D                    | –                                                  | CBT                                     | 7 sessions CBT                     | –                               |                                                                                  |
| 6  | –                                        | –                                                  | Supportive therapy                      | 10 sessions of supportive therapy  | –                               |                                                                                  |
| 7  | Promethazine (Lergigan) + Melatonin      | –                                                  | –                                       | –                                  | Neuropsychiatric assessment     |                                                                                  |
| 8  | –                                        | –                                                  | CBT                                     | 7 sessions                         | –                               |                                                                                  |

1  
2  
3  
4  
5  
6  
7  
8  
9  
10  
11  
12  
13  
14  
15  
16  
17  
18  
19  
20  
21  
22  
23  
24  
25  
26  
27  
28  
29  
30  
31  
32  
33  
34  
35  
36  
37  
38  
39  
40  
41  
42  
43  
44  
45  
46

|   |                                                                              |             |   |   |   |                                                                                                                                                                                                   |
|---|------------------------------------------------------------------------------|-------------|---|---|---|---------------------------------------------------------------------------------------------------------------------------------------------------------------------------------------------------|
| 9 | Antidepressant + sleep medication + antihistamine (unknown types and dosage) | See comment | - | - | - | Initially this participant was referred to the CAMHS and received 1 visit (classified as psychiatric assessment), and later self-referred to primary care and received the specified medications. |
|---|------------------------------------------------------------------------------|-------------|---|---|---|---------------------------------------------------------------------------------------------------------------------------------------------------------------------------------------------------|

For peer review only

**Table S1b.** TAU content, including details on treatment type, intensity and provider according to medical records

| ID | Medications                                                             | No. of visits, incl initial psychiatric assessment | Psychological or psychosocial treatment | No. of sessions   | Other intervention (no. visits) | Target for the intervention/s      | Comments                                                                                                                                                             |
|----|-------------------------------------------------------------------------|----------------------------------------------------|-----------------------------------------|-------------------|---------------------------------|------------------------------------|----------------------------------------------------------------------------------------------------------------------------------------------------------------------|
| 1  | Antidepressant (SSRI, Sertraline, 25 mg x 1)                            | 3 visits                                           | CBT                                     | 5 sessions of CBT | –                               | Social anxiety                     |                                                                                                                                                                      |
| 2  | Antidepressant (SSRI, Fluoxetine 20 mg x 1)                             | 3 visits                                           | PDT/Supportive Therapy                  | 5 sessions of PDT | –                               | Depression and unspecified anxiety | Medical records imply that it was mainly Supportive therapy, but classified as PDT according to treatment plan.                                                      |
| 3  | –                                                                       | 1 visit (psychiatric assessment only)              | –                                       | –                 | –                               | Depression                         |                                                                                                                                                                      |
| 4  | Hydroxyzine (Atarax, 25 mg x 0,5-1) + Melatonin (Melatonin, 2 mg x 1-3) | –                                                  | CBT/Supportive therapy                  | 8 sessions of CBT | –                               | Depression                         | No visits or telephone calls registered with a psychiatrist. The therapist seems to have consulted the doctor who initiated medical treatment without patient visit. |
| 5  | Melatonin (Melatonin, 4 mg)<br>Vitamin D (Benferol, 800ie)              | 1 visit                                            | CBT                                     | 11 sessions       | –                               | Depression                         |                                                                                                                                                                      |
| 6  | –                                                                       | –                                                  | Supportive therapy                      | 10 sessions       | –                               | Depression                         |                                                                                                                                                                      |

1  
2  
3  
4  
5  
6  
7  
8  
9  
10  
11  
12  
13  
14  
15  
16  
17  
18  
19  
20  
21  
22  
23  
24  
25  
26  
27  
28  
29  
30  
31  
32  
33  
34  
35  
36  
37  
38  
39  
40  
41  
42  
43  
44  
45  
46

|   |                                                                              |                                       |     |          |                                                              |                                                                                                         |                                                                                                                                   |
|---|------------------------------------------------------------------------------|---------------------------------------|-----|----------|--------------------------------------------------------------|---------------------------------------------------------------------------------------------------------|-----------------------------------------------------------------------------------------------------------------------------------|
| 7 | Promethazine (Lergigan, 25 mg as required) + Melatonin (Melatonin, 3 mg x 3) | 1 visit and 1 telephone call          | –   | –        | Neuropsychiatric assessment, 5 visits plus 3 telephone calls | Melatonin for sleep problems, and Lergigan for unspecified anxiety; Suspected neuropsychiatric symptoms |                                                                                                                                   |
| 8 | –                                                                            | –                                     | CBT | 8 visits | –                                                            | Depression                                                                                              |                                                                                                                                   |
| 9 | –                                                                            | 1 visit (psychiatric assessment only) | –   | –        | –                                                            | Depression                                                                                              | Psychiatric assessment included brief psychoeducation, then a referral was sent to primary care since the patient turned 18 years |

For peer review only

**Table S2.** Means (SD) for all measures at the three assessment points for the three groups in the study.

| <b>Group</b>                      | <b>Guided I-BA<br/>(n=11)</b> | <b>Self-guided I-BA<br/>(n=10)</b> | <b>TAU<br/>(n=11)</b> |
|-----------------------------------|-------------------------------|------------------------------------|-----------------------|
| <b>Measure</b>                    |                               |                                    |                       |
| <b>Clinician-rated</b>            |                               |                                    |                       |
| <b>CGAS</b>                       |                               |                                    |                       |
| Baseline                          | 56.6 (4.2)                    | 54.7 (6.4)                         | 52.9 (6.4)            |
| Post                              | 66.1 (13.3)                   | 60.6 (11.5)                        | 59.6 (7.8)            |
| 3-month FU §                      | 70.6 (15.4)                   | 63.6 (12.5)                        | 64.3 (10.1)           |
| <b>CGI-S</b>                      |                               |                                    |                       |
| Baseline                          | 3.5 (0.8)                     | 4.1 (1.1)                          | 3.7 (0.7)             |
| Post                              | 2.2 (1.3)                     | 3.0 (1.4)                          | 3.3 (1.2)             |
| 3-month FU §                      | 2.0 (1.5)                     | 2.3 (1.4)                          | 3.0 (1.8)             |
| <b>Child-rated</b>                |                               |                                    |                       |
| <b>RCADS-S-A</b>                  |                               |                                    |                       |
| Baseline                          | 12.5 (4.3)                    | 14.4 (8.8)                         | 12.7 (6.2)            |
| Post                              | 7.9 (5.2)                     | 7.4 (4.6)                          | 15.5 (10.3)           |
| 3-month FU §                      | 8.3 (5.3)                     | 10.1 (5.7)                         | 12.3 (9.0)            |
| <b>KIDSCREEN-10-A</b>             |                               |                                    |                       |
| Baseline                          | 31.3 (5.3)                    | 30.7 (4.2)                         | 28.4 (4.2)            |
| Post                              | 34.4 (5.3)                    | 36.0 (6.2)                         | 30.4 (5.2)            |
| 3-month FU §                      | 38.0 (5.1)                    | 38.3 (6.0)                         | 33.7 (4.9)            |
| <b>ISI</b>                        |                               |                                    |                       |
| Baseline                          | 12.4 (6.3)                    | 12.3 (6.2)                         | 15.5 (3.5)            |
| Post                              | 6.1 (4.3)                     | 7.6 (5.7)                          | 14.3 (7.9)            |
| 3-month FU §                      | 4.3 (3.6)                     | 7.0 (4.4)                          | 10.2 (5.5)            |
| <b>ARI</b>                        |                               |                                    |                       |
| Baseline                          | 3.8 (1.8)                     | 6.6 (4.1)                          | 6.6 (4.1)             |
| Post                              | 3.4 (2.7)                     | 3.9 (4.0)                          | 5.5 (4.2)             |
| 3-month FU §                      | 2.3 (1.6)                     | 2.7 (4.4)                          | 4.0 (3.4)             |
| <b>Need for further treatment</b> |                               |                                    |                       |
| 3-month FU §                      | 0.6 (0.8)                     | 1.4 (1.6)                          | <i>Not assessed</i>   |
| <b>WAI-A</b>                      |                               |                                    |                       |
| 3 weeks                           | 31.6 (10.3)                   | 31.1 (13.9)                        | 18.0 (20.8)           |
| Post                              | 36.1 (5.8)                    | 27.3 (13.7)                        | 21.4 (13.2)           |
| <b>BADS-SF</b>                    |                               |                                    |                       |
| Baseline                          | 23.1 (7.8)                    | 23.8 (8.2)                         | 19.7 (4.9)            |
| Post                              | 33.5 (8.6)                    | 34.8 (11.3)                        | 27.0 (11.5)           |
| 3-month FU §                      | 36.8 (7.9)                    | 34.9 (9.0)                         | 28.8 (8.4)            |



|                                                                                                                                                                                                                                                                                                                                                                                                                                                                                                                                                                                                                                                                                            |            |             |             |
|--------------------------------------------------------------------------------------------------------------------------------------------------------------------------------------------------------------------------------------------------------------------------------------------------------------------------------------------------------------------------------------------------------------------------------------------------------------------------------------------------------------------------------------------------------------------------------------------------------------------------------------------------------------------------------------------|------------|-------------|-------------|
| <b>Parent-rated</b>                                                                                                                                                                                                                                                                                                                                                                                                                                                                                                                                                                                                                                                                        |            |             |             |
| <b>WSAS-P</b>                                                                                                                                                                                                                                                                                                                                                                                                                                                                                                                                                                                                                                                                              |            |             |             |
| Baseline                                                                                                                                                                                                                                                                                                                                                                                                                                                                                                                                                                                                                                                                                   | 18.5 (8.4) | 16.1 (11.0) | 19.2 (7.9)  |
| Post                                                                                                                                                                                                                                                                                                                                                                                                                                                                                                                                                                                                                                                                                       | 13.2 (7.0) | 11.7 (9.6)  | 21.9 (7.9)  |
| 3-month follow-up§                                                                                                                                                                                                                                                                                                                                                                                                                                                                                                                                                                                                                                                                         | 11.6 (9.7) | 13.1 (11.1) | 13.2 (8.9)  |
| <b>RCADS-S-P</b>                                                                                                                                                                                                                                                                                                                                                                                                                                                                                                                                                                                                                                                                           |            |             |             |
| Baseline                                                                                                                                                                                                                                                                                                                                                                                                                                                                                                                                                                                                                                                                                   | 10.6 (6.6) | 10.3 (4.9)  | 10.4 (7.0)  |
| Post                                                                                                                                                                                                                                                                                                                                                                                                                                                                                                                                                                                                                                                                                       | 9.2 (6.4)  | 8.8 (4.1)   | 10.0 (5.3)  |
| 3-month FU §                                                                                                                                                                                                                                                                                                                                                                                                                                                                                                                                                                                                                                                                               | 7.7 (6.1)  | 6.5 (4.5)   | 7.9 (5.7)   |
| <b>KIDSCREEN-10-P</b>                                                                                                                                                                                                                                                                                                                                                                                                                                                                                                                                                                                                                                                                      |            |             |             |
| Baseline                                                                                                                                                                                                                                                                                                                                                                                                                                                                                                                                                                                                                                                                                   | 29.6 (4.2) | 30.3 (5.6)  | 28.0 (5.4)  |
| Post                                                                                                                                                                                                                                                                                                                                                                                                                                                                                                                                                                                                                                                                                       | 31.5 (3.3) | 34.8 (4.4)  | 31.2 (4.7)  |
| 3-month FU §                                                                                                                                                                                                                                                                                                                                                                                                                                                                                                                                                                                                                                                                               | 34.2 (3.4) | 33.0 (8.3)  | 31.6 (5.0)  |
| <b>Need for further treatment-P</b>                                                                                                                                                                                                                                                                                                                                                                                                                                                                                                                                                                                                                                                        |            |             |             |
| 3-month FU §                                                                                                                                                                                                                                                                                                                                                                                                                                                                                                                                                                                                                                                                               | 1.6 (1.4)  | 1.7 (1.6)   | 2.0 (1.2)   |
| <b>WAI-P</b>                                                                                                                                                                                                                                                                                                                                                                                                                                                                                                                                                                                                                                                                               |            |             |             |
| 3 weeks                                                                                                                                                                                                                                                                                                                                                                                                                                                                                                                                                                                                                                                                                    | 38.8 (3.3) | 33.0 (5.4)  | 23.3 (12.1) |
| Post                                                                                                                                                                                                                                                                                                                                                                                                                                                                                                                                                                                                                                                                                       | 38.1 (4.4) | 32.4 (9.1)  | 19.5 (11.5) |
| <p>I-BA = Internet-delivered behavioural activation; TAU = treatment as usual; CGAS = Children's Global Assessment Scale; CGI-S = Clinical Global Impression – Severity; RCADS-S (A/P) = Revised Children's Anxiety and Depression Scale, short version, anxiety subscales, adolescent and parent version; KIDSCREEN-10 (A/P) = a measure for general health-related quality of life, adolescent and parent version; ISI = Insomnia Severity Index; ARI = Affective Reactivity Index; WAI = Working Alliance Inventory; BADS-SF = Behavioural Activation and Avoidance Scale Short Form; WSAS (P) = Work and Social Adjustment Scale, parent version<br/>           §Primary endpoint.</p> |            |             |             |

Table S3. Fixed effects and effect sizes for all measures at follow-up compared to baseline, presented separately for the three groups and types of rater.

| Measure                                                                                                                                                                                                                                                                                                                                                                                                                                                                                                                                                                                                                                                                                                                                                                                                                                  | Guided I-BA (n=11)                     |                                  | Self-guided I-BA (n=10)                |                                  | TAU (n=11)                             |                                  |
|------------------------------------------------------------------------------------------------------------------------------------------------------------------------------------------------------------------------------------------------------------------------------------------------------------------------------------------------------------------------------------------------------------------------------------------------------------------------------------------------------------------------------------------------------------------------------------------------------------------------------------------------------------------------------------------------------------------------------------------------------------------------------------------------------------------------------------------|----------------------------------------|----------------------------------|----------------------------------------|----------------------------------|----------------------------------------|----------------------------------|
|                                                                                                                                                                                                                                                                                                                                                                                                                                                                                                                                                                                                                                                                                                                                                                                                                                          | Unstandardised coefficient B (95 % CI) | Effect size (Cohen's d, 95 % CI) | Unstandardised coefficient B (95 % CI) | Effect size (Cohen's d, 95 % CI) | Unstandardised coefficient B (95 % CI) | Effect size (Cohen's d, 95 % CI) |
| <i>Clinician-rated</i>                                                                                                                                                                                                                                                                                                                                                                                                                                                                                                                                                                                                                                                                                                                                                                                                                   |                                        |                                  |                                        |                                  |                                        |                                  |
| CGI-S                                                                                                                                                                                                                                                                                                                                                                                                                                                                                                                                                                                                                                                                                                                                                                                                                                    | -0.69 (-1.12 to -0.26)**               | 1.57 (0.59 to 2.55)              | -0.85 (-1.24 to -0.46)***              | 1.94 (1.05 to 2.83)              | -0.37 (-0.86 to 0.12)                  | 0.85 (-0.26 to 1.96)             |
| CGAS                                                                                                                                                                                                                                                                                                                                                                                                                                                                                                                                                                                                                                                                                                                                                                                                                                     | 6.86 (2.46 to 11.25)**                 | 2.36 (0.85 to 3.87)              | 4.35 (1.21 to 7.50)**                  | 1.50 (0.42 to 2.58)              | 5.76 (3.12 to 8.41)***                 | 1.98 (1.07 to 2.89)              |
| <i>Child-rated</i>                                                                                                                                                                                                                                                                                                                                                                                                                                                                                                                                                                                                                                                                                                                                                                                                                       |                                        |                                  |                                        |                                  |                                        |                                  |
| RCADS-S                                                                                                                                                                                                                                                                                                                                                                                                                                                                                                                                                                                                                                                                                                                                                                                                                                  | -2.12 (-0.92 to -3.32)***              | 0.66 (0.29 to 1.03)              | -2.48 (-4.85 to -0.10)*                | 0.77 (0.03 to 1.50)              | -0.29 (-2.75 to 2.16)                  | 0.09 (-0.67 to 0.85)             |
| ARI                                                                                                                                                                                                                                                                                                                                                                                                                                                                                                                                                                                                                                                                                                                                                                                                                                      | -0.63 (-1.40 to 0.14)                  | 0.35 (-0.07 to 0.77)             | -2.01 (-3.37 to -0.65)**               | 1.10 (0.36 to 1.85)              | -1.40 (-2.40 to -0.40)**               | 0.77 (0.22 to 1.31)              |
| ISI                                                                                                                                                                                                                                                                                                                                                                                                                                                                                                                                                                                                                                                                                                                                                                                                                                      | -4.14 (-5.69 to -2.60)***              | 1.51 (0.94 to 2.07)              | -2.64 (-4.36 to -0.92)**               | 0.96 (0.33 to 1.59)              | -2.69 (-4.91 to -0.47)*                | 0.98 (0.17 to 1.79)              |
| KIDSCREEN-10                                                                                                                                                                                                                                                                                                                                                                                                                                                                                                                                                                                                                                                                                                                                                                                                                             | 3.03 (1.80 to 4.27)***                 | 1.31 (0.77 to 1.84)              | 3.46 (1.93 to 4.99)***                 | 1.49 (0.83 to 2.15)              | 2.71 (0.65 to 4.76)*                   | 1.17 (0.28 to 2.05)              |
| <i>Parent-rated</i>                                                                                                                                                                                                                                                                                                                                                                                                                                                                                                                                                                                                                                                                                                                                                                                                                      |                                        |                                  |                                        |                                  |                                        |                                  |
| WSAS                                                                                                                                                                                                                                                                                                                                                                                                                                                                                                                                                                                                                                                                                                                                                                                                                                     | -3.23 (-5.09 to -1.37)**               | 0.72 (0.31 to 1.14)              | -1.50 (-3.27 to 0.27)                  | 0.34 (-0.06 to 0.73)             | -2.63 (-5.31 to 0.04)                  | 0.59 (-0.01 to 1.19)             |
| RCADS-S                                                                                                                                                                                                                                                                                                                                                                                                                                                                                                                                                                                                                                                                                                                                                                                                                                  | -1.59 (-2.94 to -0.24)*                | 0.53 (0.08 to 0.97)              | -2.20 (-3.58 to -0.82)**               | 0.73 (0.27 to 1.18)              | -1.39 (-3.17 to 0.39)                  | 0.46 (-0.13 to 1.05)             |
| KIDSCREEN-10                                                                                                                                                                                                                                                                                                                                                                                                                                                                                                                                                                                                                                                                                                                                                                                                                             | 2.16 (1.14 to 3.17)***                 | 0.86 (0.46 to 1.27)              | 2.25 (0.74 to 3.76)**                  | 0.90 (0.30 to 1.51)              | 1.82 (0.01 to 3.62)*                   | 0.73 (0.00 to 1.45)              |
| <p>I-BA = Internet-delivered behavioural activation; TAU = treatment as usual; CGAS = Children's Global Assessment Scale; CGI-S = Clinical Global Impression – Severity; RCADS-S (A/P) = Revised Children's Anxiety and Depression Scale, short version, anxiety subscales, adolescent and parent version; KIDSCREEN-10 (A/P) = a measure for general health-related quality of life, adolescent and parent version; ISI = Insomnia Severity Index; ARI = Affective Reactivity Index; WSAS (P) = Work and Social Adjustment Scale, parent version</p> <p>*p &lt; 0.05, **p &lt; 0.01, ***p &lt; 0.001.</p> <p>‡All Cohen's d effect sizes are calculated from the regression model. The 3-month follow-up effect sizes compare to baseline. Effect sizes of 0.2, 0.5 and 0.8 are considered small, moderate and large, respectively.</p> |                                        |                                  |                                        |                                  |                                        |                                  |

## CONSORT checklist of information to include when reporting a pilot trial\*

| Section/topic and item No  | Standard checklist item                                                                                                               | Extension for pilot trials                                                                                                                                   | Page No where item is reported |
|----------------------------|---------------------------------------------------------------------------------------------------------------------------------------|--------------------------------------------------------------------------------------------------------------------------------------------------------------|--------------------------------|
| <b>Title and abstract</b>  |                                                                                                                                       |                                                                                                                                                              |                                |
| 1a                         | Identification as a randomised trial in the title                                                                                     | Identification as a pilot or feasibility randomised trial in the title                                                                                       | p. 1                           |
| 1b                         | Structured summary of trial design, methods, results, and conclusions (for specific guidance see CONSORT for abstracts)               | Structured summary of pilot trial design, methods, results, and conclusions (for specific guidance see CONSORT abstract extension for pilot trials)          | p. 2                           |
| <b>Introduction</b>        |                                                                                                                                       |                                                                                                                                                              |                                |
| Background and objectives: |                                                                                                                                       |                                                                                                                                                              |                                |
| 2a                         | Scientific background and explanation of rationale                                                                                    | Scientific background and explanation of rationale for future definitive trial, and reasons for randomised pilot trial                                       | p. 4-5                         |
| 2b                         | Specific objectives or hypotheses                                                                                                     | Specific objectives or research questions for pilot trial                                                                                                    | p. 5                           |
| <b>Methods</b>             |                                                                                                                                       |                                                                                                                                                              |                                |
| Trial design:              |                                                                                                                                       |                                                                                                                                                              |                                |
| 3a                         | Description of trial design (such as parallel, factorial) including allocation ratio                                                  | Description of pilot trial design (such as parallel, factorial) including allocation ratio                                                                   | p. 6                           |
| 3b                         | Important changes to methods after trial commencement (such as eligibility criteria), with reasons                                    | Important changes to methods after pilot trial commencement (such as eligibility criteria), with reasons                                                     | p. 6                           |
| Participants:              |                                                                                                                                       |                                                                                                                                                              |                                |
| 4a                         | Eligibility criteria for participants                                                                                                 |                                                                                                                                                              | p. 6                           |
| 4b                         | Settings and locations where the data were collected                                                                                  |                                                                                                                                                              | p. 6                           |
| 4c                         |                                                                                                                                       | How participants were identified and consented                                                                                                               | p. 7                           |
| Interventions:             |                                                                                                                                       |                                                                                                                                                              |                                |
| 5                          | The interventions for each group with sufficient details to allow replication, including how and when they were actually administered |                                                                                                                                                              | pp. 8-10                       |
| Outcomes:                  |                                                                                                                                       |                                                                                                                                                              |                                |
| 6a                         | Completely defined prespecified primary and secondary outcome measures, including how and when they were assessed                     | Completely defined prespecified assessments or measurements to address each pilot trial objective specified in 2b, including how and when they were assessed | pp. 8; 11-14                   |
| 6b                         | Any changes to trial outcomes after the trial commenced, with reasons                                                                 | Any changes to pilot trial assessments or measurements after the pilot trial commenced, with reasons                                                         | p. 14                          |
| 6c                         |                                                                                                                                       | If applicable, prespecified criteria used to judge whether, or how, to proceed with future definitive trial                                                  | N/A                            |

|    |                                                       |                                                                                                                                                                                             |                                                                                                                                                                                       |                  |
|----|-------------------------------------------------------|---------------------------------------------------------------------------------------------------------------------------------------------------------------------------------------------|---------------------------------------------------------------------------------------------------------------------------------------------------------------------------------------|------------------|
| 1  |                                                       |                                                                                                                                                                                             |                                                                                                                                                                                       |                  |
| 2  |                                                       |                                                                                                                                                                                             |                                                                                                                                                                                       |                  |
| 3  | Sample size:                                          |                                                                                                                                                                                             |                                                                                                                                                                                       |                  |
| 4  | 7a                                                    | How sample size was determined                                                                                                                                                              | Rationale for numbers in the pilot trial                                                                                                                                              | p. 7             |
| 5  | 7b                                                    | When applicable, explanation of any interim analyses and stopping guidelines                                                                                                                |                                                                                                                                                                                       |                  |
| 6  |                                                       |                                                                                                                                                                                             |                                                                                                                                                                                       |                  |
| 7  |                                                       |                                                                                                                                                                                             |                                                                                                                                                                                       |                  |
| 8  | Randomisation:                                        |                                                                                                                                                                                             |                                                                                                                                                                                       |                  |
| 9  | Sequence generation:                                  |                                                                                                                                                                                             |                                                                                                                                                                                       |                  |
| 10 | 8a                                                    | Method used to generate the random allocation sequence                                                                                                                                      |                                                                                                                                                                                       | p. 14            |
| 11 |                                                       |                                                                                                                                                                                             |                                                                                                                                                                                       |                  |
| 12 | 8b                                                    | Type of randomisation; details of any restriction (such as blocking and block size)                                                                                                         | Type of randomisation(s); details of any restriction (such as blocking and block size)                                                                                                | p. 14            |
| 13 |                                                       |                                                                                                                                                                                             |                                                                                                                                                                                       |                  |
| 14 |                                                       |                                                                                                                                                                                             |                                                                                                                                                                                       |                  |
| 15 |                                                       |                                                                                                                                                                                             |                                                                                                                                                                                       |                  |
| 16 | Allocation concealment mechanism:                     |                                                                                                                                                                                             |                                                                                                                                                                                       |                  |
| 17 | 9                                                     | Mechanism used to implement the random allocation sequence (such as sequentially numbered containers), describing any steps taken to conceal the sequence until interventions were assigned |                                                                                                                                                                                       | p. 14            |
| 18 |                                                       |                                                                                                                                                                                             |                                                                                                                                                                                       |                  |
| 19 |                                                       |                                                                                                                                                                                             |                                                                                                                                                                                       |                  |
| 20 |                                                       |                                                                                                                                                                                             |                                                                                                                                                                                       |                  |
| 21 |                                                       |                                                                                                                                                                                             |                                                                                                                                                                                       |                  |
| 22 |                                                       |                                                                                                                                                                                             |                                                                                                                                                                                       |                  |
| 23 |                                                       |                                                                                                                                                                                             |                                                                                                                                                                                       |                  |
| 24 |                                                       |                                                                                                                                                                                             |                                                                                                                                                                                       |                  |
| 25 | Implementation:                                       |                                                                                                                                                                                             |                                                                                                                                                                                       |                  |
| 26 | 10                                                    | Who generated the random allocation sequence, enrolled participants, and assigned participants to interventions                                                                             |                                                                                                                                                                                       | p. 14            |
| 27 |                                                       |                                                                                                                                                                                             |                                                                                                                                                                                       |                  |
| 28 |                                                       |                                                                                                                                                                                             |                                                                                                                                                                                       |                  |
| 29 |                                                       |                                                                                                                                                                                             |                                                                                                                                                                                       |                  |
| 30 | Blinding:                                             |                                                                                                                                                                                             |                                                                                                                                                                                       |                  |
| 31 | 11a                                                   | If done, who was blinded after assignment to interventions (eg, participants, care providers, those assessing outcomes) and how                                                             |                                                                                                                                                                                       | p. 6; 14         |
| 32 |                                                       |                                                                                                                                                                                             |                                                                                                                                                                                       |                  |
| 33 |                                                       |                                                                                                                                                                                             |                                                                                                                                                                                       |                  |
| 34 |                                                       |                                                                                                                                                                                             |                                                                                                                                                                                       |                  |
| 35 |                                                       |                                                                                                                                                                                             |                                                                                                                                                                                       |                  |
| 36 | 11b                                                   | If relevant, description of the similarity of interventions                                                                                                                                 |                                                                                                                                                                                       | N/A              |
| 37 |                                                       |                                                                                                                                                                                             |                                                                                                                                                                                       |                  |
| 38 | Analytical methods:                                   |                                                                                                                                                                                             |                                                                                                                                                                                       |                  |
| 39 | 12a                                                   | Statistical methods used to compare groups for primary and secondary outcomes                                                                                                               | Methods used to address each pilot trial objective whether qualitative or quantitative                                                                                                | pp. 14-15        |
| 40 |                                                       |                                                                                                                                                                                             |                                                                                                                                                                                       |                  |
| 41 |                                                       |                                                                                                                                                                                             |                                                                                                                                                                                       |                  |
| 42 | 12b                                                   | Methods for additional analyses, such as subgroup analyses and adjusted analyses                                                                                                            | Not applicable                                                                                                                                                                        | N/A              |
| 43 |                                                       |                                                                                                                                                                                             |                                                                                                                                                                                       |                  |
| 44 |                                                       |                                                                                                                                                                                             |                                                                                                                                                                                       |                  |
| 45 | <b>Results</b>                                        |                                                                                                                                                                                             |                                                                                                                                                                                       |                  |
| 46 | Participant flow (a diagram is strongly recommended): |                                                                                                                                                                                             |                                                                                                                                                                                       |                  |
| 47 |                                                       |                                                                                                                                                                                             |                                                                                                                                                                                       |                  |
| 48 | 13a                                                   | For each group, the numbers of participants who were randomly assigned, received intended treatment, and were analysed for the primary outcome                                              | For each group, the numbers of participants who were approached and/or assessed for eligibility, randomly assigned, received intended treatment, and were assessed for each objective | p. 15 and Fig. 1 |
| 49 |                                                       |                                                                                                                                                                                             |                                                                                                                                                                                       |                  |
| 50 |                                                       |                                                                                                                                                                                             |                                                                                                                                                                                       |                  |
| 51 |                                                       |                                                                                                                                                                                             |                                                                                                                                                                                       |                  |
| 52 |                                                       |                                                                                                                                                                                             |                                                                                                                                                                                       |                  |
| 53 |                                                       |                                                                                                                                                                                             |                                                                                                                                                                                       |                  |
| 54 |                                                       |                                                                                                                                                                                             |                                                                                                                                                                                       |                  |
| 55 | 13b                                                   | For each group, losses and exclusions after randomisation, together with reasons                                                                                                            |                                                                                                                                                                                       | p. 15            |
| 56 |                                                       |                                                                                                                                                                                             |                                                                                                                                                                                       |                  |
| 57 |                                                       |                                                                                                                                                                                             |                                                                                                                                                                                       |                  |
| 58 | Recruitment:                                          |                                                                                                                                                                                             |                                                                                                                                                                                       |                  |
| 59 |                                                       |                                                                                                                                                                                             |                                                                                                                                                                                       |                  |
| 60 |                                                       |                                                                                                                                                                                             |                                                                                                                                                                                       |                  |

|    |                          |                                                                                                                                                   |                                                                                                                                                                                |                  |
|----|--------------------------|---------------------------------------------------------------------------------------------------------------------------------------------------|--------------------------------------------------------------------------------------------------------------------------------------------------------------------------------|------------------|
| 1  |                          |                                                                                                                                                   |                                                                                                                                                                                |                  |
| 2  |                          |                                                                                                                                                   |                                                                                                                                                                                |                  |
| 3  | 14a                      | Dates defining the periods of recruitment and follow-up                                                                                           |                                                                                                                                                                                | p. 15            |
| 4  |                          |                                                                                                                                                   |                                                                                                                                                                                |                  |
| 5  | 14b                      | Why the trial ended or was stopped                                                                                                                | Why the pilot trial ended or was stopped                                                                                                                                       | p. 15            |
| 6  | Baseline data:           |                                                                                                                                                   |                                                                                                                                                                                |                  |
| 7  |                          |                                                                                                                                                   |                                                                                                                                                                                |                  |
| 8  | 15                       | A table showing baseline demographic and clinical characteristics for each group                                                                  |                                                                                                                                                                                | Table 1          |
| 9  |                          |                                                                                                                                                   |                                                                                                                                                                                |                  |
| 10 | Numbers analysed:        |                                                                                                                                                   |                                                                                                                                                                                |                  |
| 11 |                          |                                                                                                                                                   |                                                                                                                                                                                |                  |
| 12 | 16                       | For each group, number of participants (denominator) included in each analysis and whether the analysis was by original assigned groups           | For each objective, number of participants (denominator) included in each analysis. If relevant, these numbers should be by randomised group                                   | p. 15 and Fig. 1 |
| 13 |                          |                                                                                                                                                   |                                                                                                                                                                                |                  |
| 14 |                          |                                                                                                                                                   |                                                                                                                                                                                |                  |
| 15 |                          |                                                                                                                                                   |                                                                                                                                                                                |                  |
| 16 |                          |                                                                                                                                                   |                                                                                                                                                                                |                  |
| 17 | Outcomes and estimation: |                                                                                                                                                   |                                                                                                                                                                                |                  |
| 18 |                          |                                                                                                                                                   |                                                                                                                                                                                |                  |
| 19 | 17a                      | For each primary and secondary outcome, results for each group, and the estimated effect size and its precision (such as 95% confidence interval) | For each objective, results including expressions of uncertainty (such as 95% confidence interval) for any estimates. If relevant, these results should be by randomised group | pp. 18-20        |
| 20 |                          |                                                                                                                                                   |                                                                                                                                                                                |                  |
| 21 |                          |                                                                                                                                                   |                                                                                                                                                                                |                  |
| 22 |                          |                                                                                                                                                   |                                                                                                                                                                                |                  |
| 23 |                          |                                                                                                                                                   |                                                                                                                                                                                |                  |
| 24 | 17b                      | For binary outcomes, presentation of both absolute and relative effect sizes is recommended                                                       | Not applicable                                                                                                                                                                 | N/A              |
| 25 |                          |                                                                                                                                                   |                                                                                                                                                                                |                  |
| 26 |                          |                                                                                                                                                   |                                                                                                                                                                                |                  |
| 27 | Ancillary analyses:      |                                                                                                                                                   |                                                                                                                                                                                |                  |
| 28 |                          |                                                                                                                                                   |                                                                                                                                                                                |                  |
| 29 | 18                       | Results of any other analyses performed, including subgroup analyses and adjusted analyses, distinguishing prespecified from exploratory          | Results of any other analyses performed that could be used to inform the future definitive trial                                                                               | N/A              |
| 30 |                          |                                                                                                                                                   |                                                                                                                                                                                |                  |
| 31 |                          |                                                                                                                                                   |                                                                                                                                                                                |                  |
| 32 |                          |                                                                                                                                                   |                                                                                                                                                                                |                  |
| 33 | Harms:                   |                                                                                                                                                   |                                                                                                                                                                                |                  |
| 34 |                          |                                                                                                                                                   |                                                                                                                                                                                |                  |
| 35 | 19                       | All important harms or unintended effects in each group (for specific guidance see CONSORT for harms)                                             |                                                                                                                                                                                | p. 17            |
| 36 |                          |                                                                                                                                                   |                                                                                                                                                                                |                  |
| 37 |                          |                                                                                                                                                   |                                                                                                                                                                                |                  |
| 38 | 19a                      |                                                                                                                                                   | If relevant, other important unintended consequences                                                                                                                           | pp. 17           |
| 39 |                          |                                                                                                                                                   |                                                                                                                                                                                |                  |
| 40 | <b>Discussion</b>        |                                                                                                                                                   |                                                                                                                                                                                |                  |
| 41 | Limitations:             |                                                                                                                                                   |                                                                                                                                                                                |                  |
| 42 |                          |                                                                                                                                                   |                                                                                                                                                                                |                  |
| 43 | 20                       | Trial limitations, addressing sources of potential bias, imprecision, and, if relevant, multiplicity of analyses                                  | Pilot trial limitations, addressing sources of potential bias and remaining uncertainty about feasibility                                                                      | pp. 22           |
| 44 |                          |                                                                                                                                                   |                                                                                                                                                                                |                  |
| 45 |                          |                                                                                                                                                   |                                                                                                                                                                                |                  |
| 46 | Generalisability:        |                                                                                                                                                   |                                                                                                                                                                                |                  |
| 47 |                          |                                                                                                                                                   |                                                                                                                                                                                |                  |
| 48 | 21                       | Generalisability (external validity, applicability) of the trial findings                                                                         | Generalisability (applicability) of pilot trial methods and findings to future definitive trial and other studies                                                              | pp. 21-23        |
| 49 |                          |                                                                                                                                                   |                                                                                                                                                                                |                  |
| 50 | Interpretation:          |                                                                                                                                                   |                                                                                                                                                                                |                  |
| 51 |                          |                                                                                                                                                   |                                                                                                                                                                                |                  |
| 52 | 22                       | Interpretation consistent with results, balancing benefits and harms, and considering other relevant evidence                                     | Interpretation consistent with pilot trial objectives and findings, balancing potential benefits and harms, and considering other relevant evidence                            | pp. 21-23        |
| 53 |                          |                                                                                                                                                   |                                                                                                                                                                                |                  |
| 54 |                          |                                                                                                                                                   |                                                                                                                                                                                |                  |
| 55 | 22a                      |                                                                                                                                                   | Implications for progression from pilot to future definitive trial, including any proposed amendments                                                                          |                  |
| 56 |                          |                                                                                                                                                   |                                                                                                                                                                                |                  |
| 57 |                          |                                                                                                                                                   |                                                                                                                                                                                |                  |
| 58 | <b>Other information</b> |                                                                                                                                                   |                                                                                                                                                                                |                  |
| 59 |                          |                                                                                                                                                   |                                                                                                                                                                                |                  |
| 60 |                          |                                                                                                                                                   |                                                                                                                                                                                |                  |

1  
2  
3  
4  
5  
6  
7  
8  
9  
10  
11  
12  
13  
14  
15  
16  
17  
18  
19  
20  
21  
22  
23  
24  
25  
26  
27  
28  
29  
30  
31  
32  
33  
34  
35  
36  
37  
38  
39  
40  
41  
42  
43  
44  
45  
46  
47  
48  
49  
50  
51  
52  
53  
54  
55  
56  
57  
58  
59  
60

|               |    |                                                                                 |                                                                                                  |
|---------------|----|---------------------------------------------------------------------------------|--------------------------------------------------------------------------------------------------|
| Registration: |    |                                                                                 |                                                                                                  |
|               | 23 | Registration number and name of trial registry                                  | Registration number for pilot trial and name of trial registry p. 3                              |
| Protocol:     |    |                                                                                 |                                                                                                  |
|               | 24 | Where the full trial protocol can be accessed, if available                     | Where the pilot trial protocol can be accessed, if available p. 24                               |
| Funding:      |    |                                                                                 |                                                                                                  |
|               | 25 | Sources of funding and other support (such as supply of drugs), role of funders | p. 3; 24                                                                                         |
|               | 26 |                                                                                 | Ethical approval or approval by research review committee, confirmed with reference number p. 24 |

---

\*Here a pilot trial means any randomised study conducted in preparation for a future definitive RCT, where the main objective of the pilot trial is to assess feasibility.

For peer review only
