# Supplementary material for: Therapist-guided and self-guided internet-delivered behavioural activation for adolescents with depression: a randomised feasibility trial
Source: PubMed Central journal article supplement — BMJ Open. 2022 Dec 26;12(12):e066357. doi: 10.1136/bmjopen-2022-066357 (PMC9806095; doi:10.1136/bmjopen-2022-066357), 2022-12-26
Supplement: bmjopen-2022-066357supp002.pdf [file bmjopen-2022-066357supp002.pdf]

**Figure S1***Screenshots of I-BA treatment*

1. To the left: Overview and start page, with list of chapters (BIP Depression). To the right: A psychoeducative video about depression.

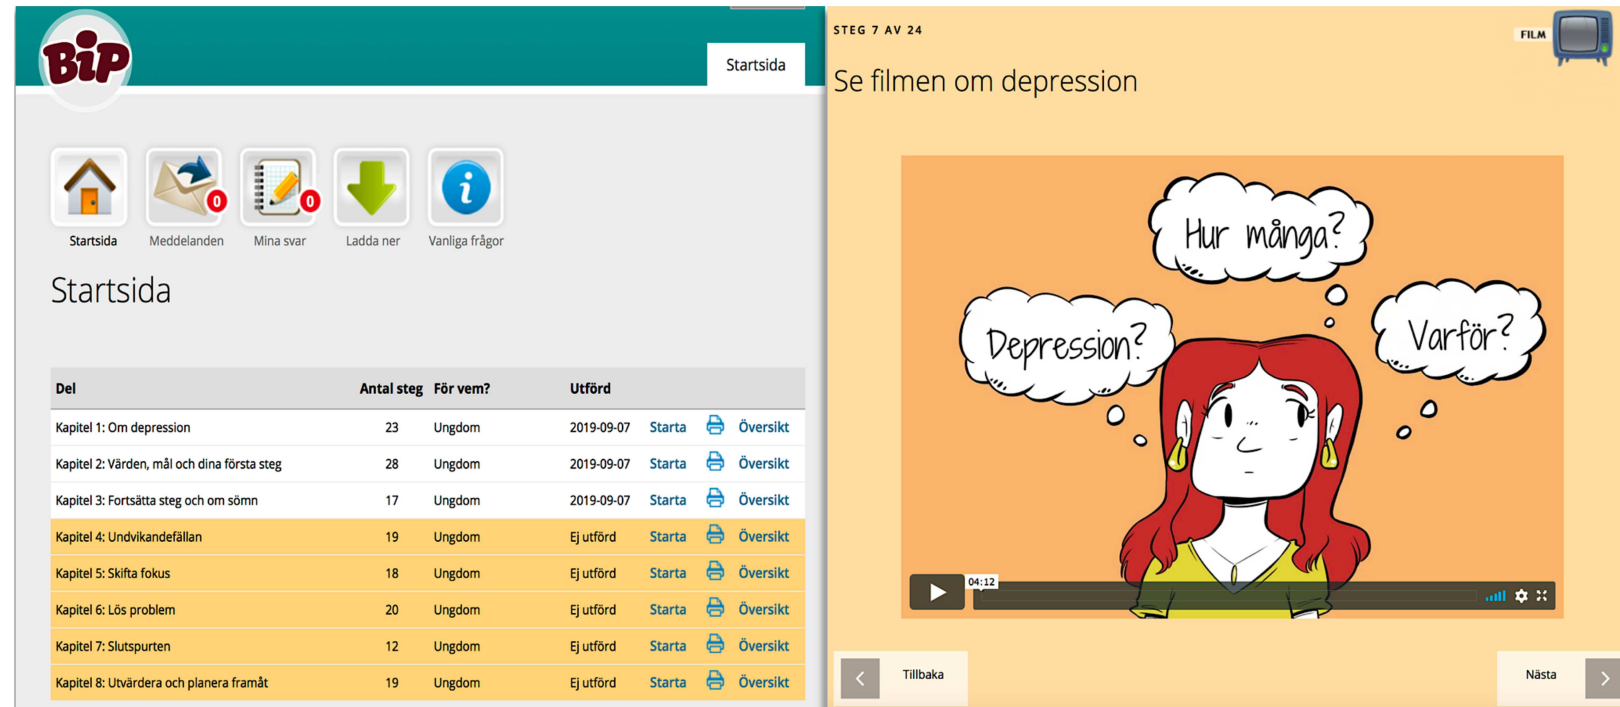

The screenshot displays the BIP Depression treatment interface. On the left, the 'Startsida' (Home) page features a navigation menu with icons for 'Startsida', 'Meddelanden', 'Mina svar', 'Ladda ner', and 'Vanliga frågor'. Below the menu is a table of chapters:

| Del                                         | Antal steg | För vem? | Utförd                                                     |
|---------------------------------------------|------------|----------|------------------------------------------------------------|
| Kapitel 1: Om depression                    | 23         | Ungdom   | 2019-09-07 <a href="#">Starta</a> <a href="#">Översikt</a> |
| Kapitel 2: Värden, mål och dina första steg | 28         | Ungdom   | 2019-09-07 <a href="#">Starta</a> <a href="#">Översikt</a> |
| Kapitel 3: Fortsätta steg och om sömn       | 17         | Ungdom   | 2019-09-07 <a href="#">Starta</a> <a href="#">Översikt</a> |
| Kapitel 4: Undvikandefällan                 | 19         | Ungdom   | Ej utförd <a href="#">Starta</a> <a href="#">Översikt</a>  |
| Kapitel 5: Skifta fokus                     | 18         | Ungdom   | Ej utförd <a href="#">Starta</a> <a href="#">Översikt</a>  |
| Kapitel 6: Lös problem                      | 20         | Ungdom   | Ej utförd <a href="#">Starta</a> <a href="#">Översikt</a>  |
| Kapitel 7: Slutspurten                      | 12         | Ungdom   | Ej utförd <a href="#">Starta</a> <a href="#">Översikt</a>  |
| Kapitel 8: Utvärdera och planera framåt     | 19         | Ungdom   | Ej utförd <a href="#">Starta</a> <a href="#">Översikt</a>  |

On the right, a video player shows a cartoon character with red hair and yellow earrings. Three thought bubbles above her contain the questions: 'Depression?', 'Hur många?' (How many?), and 'Varför?' (Why?). The video player interface includes a play button, a progress bar showing 04:12, and navigation buttons for 'Tillbaka' (Back) and 'Nästa' (Next).

2. To the left: An exercise about the avoidance trap. To the right: The three fictional characters sharing their treatment goals.

STEG 9 AV 19

### Undvikandefällan - hmm...

Det är alltså väldigt mänskligt att undvika jobbiga situationer och känslor. Och när man är deprimerad är det lätt hänt att undvikandet blir ett mönster. Nu är vi nyfikna på att höra vad du tänker om filmen!



**Del:** Kapitel 4: Undvikandefällan  
**Steg:** Undvikandefällan - hmm...  
**Senast uppdaterad:** 07 Sep 2019 20:13

Kan du känna igen dig i att du ibland hamnar i undvikandefällan? Om ja, på vilket sätt? Om nej, vad är det du inte känner igen?

Vad tror du, hänger undvikande och depression ihop för dig?

Här kan du och din behandlare skicka meddelanden till varandra

Rebecca Grudin

**BIP**

Kapitel 2: Värderna, mål och dina första steg

STEG 18 AV 28

## Exempel på behandlingsmål

Det är som sagt bra att ha mål med behandlingen i BIP. Målen beskriver vad du vill försöka klara av under behandlingen och vad som är viktigt för dig.

Här kan du se vilka mål Noomi, Amin & Molly har för sina behandlingar!



**Noomi - stressad över skolan, vill inte lasta föräldrarna, ledsen och vilår mycket**

Här är Noomis mål för behandlingen:

- Börja dansa regelbundet igen.
- Träffa kompisar varje helg.
- Plugga på bestämda tider, senast till kl 19 vardagkvällar och inte på helger.

3. To the left: The app that adolescents use for doing home assignments between chapters. To the right: Written information to the caregivers about how to validate your adolescent's emotions.

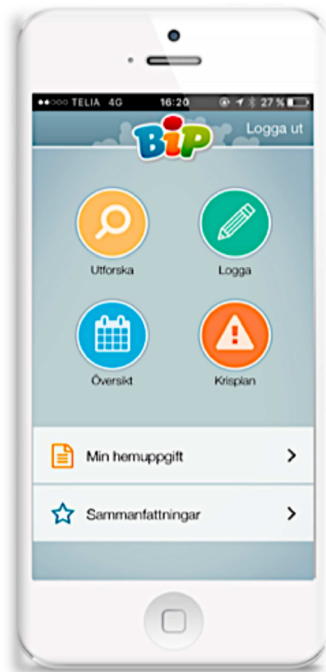

**BIP** Startsida

STEG 12 AV 17

## Bekräfta - vad, när, hur?

- Vad? >
- När? >
- Hur? >
- Exempel >
- Bekräfta känslan, inte handlingen** >

Att bekräfta någon betyder inte nödvändigtvis att du gillar eller håller med om vad personen gör (t ex ställer in med kompisar) eller att det hen upplever är sant (t ex "jag är hopplös"). Du bekräftar däremot att den andre känner vad den känner i en viss situation, och att det är begripligt.

Det går ofta att bekräfta känslan utan att samtidigt bekräfta att det är en bra idé att strunta i handlingen.

Tillbaka < > Nästa

4. Encrypted messaging function which is included in guided I-BA. The psychologist responds within 1-2 days on weekdays to messages from the participant.

The screenshot displays the BIP web portal interface. At the top right, it shows the user is logged in as 'bipticdemo' with a 'Logga ut' button. The BIP logo is on the left, and a 'Startsida' button is on the right. Below the logo are five navigation icons: 'Startsida' (home), 'Meddelanden' (messages, with a red notification bubble), 'Mina svar' (my answers, with a red notification bubble), 'Ladda ner' (download), and 'Vanliga frågor' (frequently asked questions). The main heading is 'Meddelanden'. Below it are four filter buttons: 'Inkorg', 'Nytt meddelande' (highlighted in dark blue), 'Skickade', and 'Utkast'. The message details show 'Behandlare: Per Andrén' and 'Angående:' followed by an empty text box. Below that is a larger text area labeled 'Skriv meddelande:'. At the bottom of the message area are two buttons: 'Spara som utkast' and 'Skicka'. The footer includes the logo for 'Barn- och ungdomspsykiatri STOCKHOLMS LÄNS LÄNSSTING' and a link for 'Om Cookies »'.
