# Supplementary material for: Therapist-guided and self-guided internet-delivered behavioural activation for adolescents with depression: a randomised feasibility trial
Source: PubMed Central journal article supplement — BMJ Open. 2022 Dec 26;12(12):e066357. doi: 10.1136/bmjopen-2022-066357 (PMC9806095; doi:10.1136/bmjopen-2022-066357), 2022-12-26
Supplement: bmjopen-2022-066357supp003.pdf [file bmjopen-2022-066357supp003.pdf]

**Table S1a.** TAU content, including details on treatment type, intensity and provider according to interviews with parents

| ID | Medications / Indication                 | No. of visits, incl initial psychiatric assessment | Psychological or psychosocial treatment | No. of sessions                    | Other intervention (no. visits) | Comments                                                                         |
|----|------------------------------------------|----------------------------------------------------|-----------------------------------------|------------------------------------|---------------------------------|----------------------------------------------------------------------------------|
| 1  | Antidepressant (SSRI, 25 mg Sertraline)  | –                                                  | CBT                                     | 5 sessions of CBT                  | –                               |                                                                                  |
| 2  | Antidepressant (SSRI, Fluoxetine, 20 mg) | –                                                  | Supportive therapy                      | 1–2 sessions of supportive therapy | –                               |                                                                                  |
| 3  | –                                        | 2 visits (psychiatric assessment only)             | –                                       | –                                  | –                               | No intervention was offered after the psychiatric assessment due to improvement. |
| 4  | Melatonin                                | –                                                  | CBT                                     | 10 sessions of CBT                 | –                               |                                                                                  |
| 5  | Melatonin + Vitamin D                    | –                                                  | CBT                                     | 7 sessions CBT                     | –                               |                                                                                  |
| 6  | –                                        | –                                                  | Supportive therapy                      | 10 sessions of supportive therapy  | –                               |                                                                                  |
| 7  | Promethazine (Lergigan) + Melatonin      | –                                                  | –                                       | –                                  | Neuropsychiatric assessment     |                                                                                  |
| 8  | –                                        | –                                                  | CBT                                     | 7 sessions                         | –                               |                                                                                  |

|   |                                                                              |             |   |   |   |                                                                                                                                                                                                   |
|---|------------------------------------------------------------------------------|-------------|---|---|---|---------------------------------------------------------------------------------------------------------------------------------------------------------------------------------------------------|
| 9 | Antidepressant + sleep medication + antihistamine (unknown types and dosage) | See comment | – | – | – | Initially this participant was referred to the CAMHS and received 1 visit (classified as psychiatric assessment), and later self-referred to primary care and received the specified medications. |
|---|------------------------------------------------------------------------------|-------------|---|---|---|---------------------------------------------------------------------------------------------------------------------------------------------------------------------------------------------------|

**Table S1b.** TAU content, including details on treatment type, intensity and provider according to medical records

| ID | Medications                                                              | No. of visits, incl initial psychiatric assessment | Psychological or psychosocial treatment | No. of sessions   | Other intervention (no. visits) | Target for the intervention/s      | Comments                                                                                                                                                             |
|----|--------------------------------------------------------------------------|----------------------------------------------------|-----------------------------------------|-------------------|---------------------------------|------------------------------------|----------------------------------------------------------------------------------------------------------------------------------------------------------------------|
| 1  | Antidepressant (SSRI, Sertraline, 25 mg x 1)                             | 3 visits                                           | CBT                                     | 5 sessions of CBT | –                               | Social anxiety                     |                                                                                                                                                                      |
| 2  | Antidepressant (SSRI, Fluoxetine 20 mg x 1)                              | 3 visits                                           | PDT/Supportive Therapy                  | 5 sessions of PDT | –                               | Depression and unspecified anxiety | Medical records imply that it was mainly Supportive therapy, but classified as PDT according to treatment plan.                                                      |
| 3  | –                                                                        | 1 visit (psychiatric assessment only)              | –                                       | –                 | –                               | Depression                         |                                                                                                                                                                      |
| 4  | Hydroxyzine (Atarax, 25 mg x 0,5-1) + Melatonin (Melatonine, 2 mg x 1-3) | –                                                  | CBT/Supportive therapy                  | 8 sessions of CBT | –                               | Depression                         | No visits or telephone calls registered with a psychiatrist. The therapist seems to have consulted the doctor who initiated medical treatment without patient visit. |
| 5  | Melatonin (Melatonine, 4 mg) Vitamin D (Benferol, 800ie)                 | 1 visit                                            | CBT                                     | 11 sessions       | –                               | Depression                         |                                                                                                                                                                      |
| 6  | –                                                                        | –                                                  | Supportive therapy                      | 10 sessions       | –                               | Depression                         |                                                                                                                                                                      |

|   |                                                                              |                                       |     |          |                                                              |                                                                                                         |                                                                                                                                   |
|---|------------------------------------------------------------------------------|---------------------------------------|-----|----------|--------------------------------------------------------------|---------------------------------------------------------------------------------------------------------|-----------------------------------------------------------------------------------------------------------------------------------|
| 7 | Promethazine (Lergigan, 25 mg as required) + Melatonin (Melatonin, 3 mg x 3) | 1 visit and 1 telephone call          | –   | –        | Neuropsychiatric assessment, 5 visits plus 3 telephone calls | Melatonin for sleep problems, and Lergigan for unspecified anxiety; Suspected neuropsychiatric symptoms |                                                                                                                                   |
| 8 | –                                                                            | –                                     | CBT | 8 visits | –                                                            | Depression                                                                                              |                                                                                                                                   |
| 9 | –                                                                            | 1 visit (psychiatric assessment only) | –   | –        | –                                                            | Depression                                                                                              | Psychiatric assessment included brief psychoeducation, then a referral was sent to primary care since the patient turned 18 years |
