# Supplementary material for: Therapist-guided and self-guided internet-delivered behavioural activation for adolescents with depression: a randomised feasibility trial
Source: PubMed Central journal article supplement — BMJ Open. 2022 Dec 26;12(12):e066357. doi: 10.1136/bmjopen-2022-066357 (PMC9806095; doi:10.1136/bmjopen-2022-066357), 2022-12-26
Supplement: bmjopen-2022-066357supp004.pdf [file bmjopen-2022-066357supp004.pdf]

**Table S2.** Means (SD) for all measures at the three assessment points for the three groups in the study.

| <b>Group</b>                      | <b>Guided I-BA<br/>(n=11)</b> | <b>Self-guided I-BA<br/>(n=10)</b> | <b>TAU<br/>(n=11)</b> |
|-----------------------------------|-------------------------------|------------------------------------|-----------------------|
| <b>Measure</b>                    |                               |                                    |                       |
| <i>Clinician-rated</i>            |                               |                                    |                       |
| <b>CGAS</b>                       |                               |                                    |                       |
| Baseline                          | 56.6 (4.2)                    | 54.7 (6.4)                         | 52.9 (6.4)            |
| Post                              | 66.1 (13.3)                   | 60.6 (11.5)                        | 59.6 (7.8)            |
| 3-month FU §                      | 70.6 (15.4)                   | 63.6 (12.5)                        | 64.3 (10.1)           |
| <b>CGI-S</b>                      |                               |                                    |                       |
| Baseline                          | 3.5 (0.8)                     | 4.1 (1.1)                          | 3.7 (0.7)             |
| Post                              | 2.2 (1.3)                     | 3.0 (1.4)                          | 3.3 (1.2)             |
| 3-month FU §                      | 2.0 (1.5)                     | 2.3 (1.4)                          | 3.0 (1.8)             |
| <i>Child-rated</i>                |                               |                                    |                       |
| <b>RCADS-S-A</b>                  |                               |                                    |                       |
| Baseline                          | 12.5 (4.3)                    | 14.4 (8.8)                         | 12.7 (6.2)            |
| Post                              | 7.9 (5.2)                     | 7.4 (4.6)                          | 15.5 (10.3)           |
| 3-month FU §                      | 8.3 (5.3)                     | 10.1 (5.7)                         | 12.3 (9.0)            |
| <b>KIDSCREEN-10-A</b>             |                               |                                    |                       |
| Baseline                          | 31.3 (5.3)                    | 30.7 (4.2)                         | 28.4 (4.2)            |
| Post                              | 34.4 (5.3)                    | 36.0 (6.2)                         | 30.4 (5.2)            |
| 3-month FU §                      | 38.0 (5.1)                    | 38.3 (6.0)                         | 33.7 (4.9)            |
| <b>ISI</b>                        |                               |                                    |                       |
| Baseline                          | 12.4 (6.3)                    | 12.3 (6.2)                         | 15.5 (3.5)            |
| Post                              | 6.1 (4.3)                     | 7.6 (5.7)                          | 14.3 (7.9)            |
| 3-month FU §                      | 4.3 (3.6)                     | 7.0 (4.4)                          | 10.2 (5.5)            |
| <b>ARI</b>                        |                               |                                    |                       |
| Baseline                          | 3.8 (1.8)                     | 6.6 (4.1)                          | 6.6 (4.1)             |
| Post                              | 3.4 (2.7)                     | 3.9 (4.0)                          | 5.5 (4.2)             |
| 3-month FU §                      | 2.3 (1.6)                     | 2.7 (4.4)                          | 4.0 (3.4)             |
| <b>Need for further treatment</b> |                               |                                    |                       |
| 3-month FU §                      | 0.6 (0.8)                     | 1.4 (1.6)                          | <i>Not assessed</i>   |
| <b>WAI-A</b>                      |                               |                                    |                       |
| 3 weeks                           | 31.6 (10.3)                   | 31.1 (13.9)                        | 18.0 (20.8)           |
| Post                              | 36.1 (5.8)                    | 27.3 (13.7)                        | 21.4 (13.2)           |
| <b>BADS-SF</b>                    |                               |                                    |                       |
| Baseline                          | 23.1 (7.8)                    | 23.8 (8.2)                         | 19.7 (4.9)            |
| Post                              | 33.5 (8.6)                    | 34.8 (11.3)                        | 27.0 (11.5)           |
| 3-month FU §                      | 36.8 (7.9)                    | 34.9 (9.0)                         | 28.8 (8.4)            |

|                                                                                                                                                                                                                                                                                                                                                                                                                                                                                                                                                                                                                                                                                  |            |             |             |
|----------------------------------------------------------------------------------------------------------------------------------------------------------------------------------------------------------------------------------------------------------------------------------------------------------------------------------------------------------------------------------------------------------------------------------------------------------------------------------------------------------------------------------------------------------------------------------------------------------------------------------------------------------------------------------|------------|-------------|-------------|
| <b>Parent-rated</b>                                                                                                                                                                                                                                                                                                                                                                                                                                                                                                                                                                                                                                                              |            |             |             |
| <b>WSAS-P</b>                                                                                                                                                                                                                                                                                                                                                                                                                                                                                                                                                                                                                                                                    |            |             |             |
| Baseline                                                                                                                                                                                                                                                                                                                                                                                                                                                                                                                                                                                                                                                                         | 18.5 (8.4) | 16.1 (11.0) | 19.2 (7.9)  |
| Post                                                                                                                                                                                                                                                                                                                                                                                                                                                                                                                                                                                                                                                                             | 13.2 (7.0) | 11.7 (9.6)  | 21.9 (7.9)  |
| 3-month follow-up§                                                                                                                                                                                                                                                                                                                                                                                                                                                                                                                                                                                                                                                               | 11.6 (9.7) | 13.1 (11.1) | 13.2 (8.9)  |
| <b>RCADS-S-P</b>                                                                                                                                                                                                                                                                                                                                                                                                                                                                                                                                                                                                                                                                 |            |             |             |
| Baseline                                                                                                                                                                                                                                                                                                                                                                                                                                                                                                                                                                                                                                                                         | 10.6 (6.6) | 10.3 (4.9)  | 10.4 (7.0)  |
| Post                                                                                                                                                                                                                                                                                                                                                                                                                                                                                                                                                                                                                                                                             | 9.2 (6.4)  | 8.8 (4.1)   | 10.0 (5.3)  |
| 3-month FU §                                                                                                                                                                                                                                                                                                                                                                                                                                                                                                                                                                                                                                                                     | 7.7 (6.1)  | 6.5 (4.5)   | 7.9 (5.7)   |
| <b>KIDSCREEN-10-P</b>                                                                                                                                                                                                                                                                                                                                                                                                                                                                                                                                                                                                                                                            |            |             |             |
| Baseline                                                                                                                                                                                                                                                                                                                                                                                                                                                                                                                                                                                                                                                                         | 29.6 (4.2) | 30.3 (5.6)  | 28.0 (5.4)  |
| Post                                                                                                                                                                                                                                                                                                                                                                                                                                                                                                                                                                                                                                                                             | 31.5 (3.3) | 34.8 (4.4)  | 31.2 (4.7)  |
| 3-month FU §                                                                                                                                                                                                                                                                                                                                                                                                                                                                                                                                                                                                                                                                     | 34.2 (3.4) | 33.0 (8.3)  | 31.6 (5.0)  |
| <b>Need for further treatment-P</b>                                                                                                                                                                                                                                                                                                                                                                                                                                                                                                                                                                                                                                              |            |             |             |
| 3-month FU §                                                                                                                                                                                                                                                                                                                                                                                                                                                                                                                                                                                                                                                                     | 1.6 (1.4)  | 1.7 (1.6)   | 2.0 (1.2)   |
| <b>WAI-P</b>                                                                                                                                                                                                                                                                                                                                                                                                                                                                                                                                                                                                                                                                     |            |             |             |
| 3 weeks                                                                                                                                                                                                                                                                                                                                                                                                                                                                                                                                                                                                                                                                          | 38.8 (3.3) | 33.0 (5.4)  | 23.3 (12.1) |
| Post                                                                                                                                                                                                                                                                                                                                                                                                                                                                                                                                                                                                                                                                             | 38.1 (4.4) | 32.4 (9.1)  | 19.5 (11.5) |
| <p>I-BA = Internet-delivered behavioural activation; TAU = treatment as usual; CGAS = Children's Global Assessment Scale; CGI-S = Clinical Global Impression – Severity; RCADS-S (A/P) = Revised Children's Anxiety and Depression Scale, short version, anxiety subscales, adolescent and parent version; KIDSCREEN-10 (A/P) = a measure for general health-related quality of life, adolescent and parent version; ISI = Insomnia Severity Index; ARI = Affective Reactivity Index; WAI = Working Alliance Inventory; BADS-SF = Behavioural Activation and Avoidance Scale Short Form; WSAS (P) = Work and Social Adjustment Scale, parent version<br/> §Primary endpoint.</p> |            |             |             |
