# Supplementary material for: Therapist-guided and self-guided internet-delivered behavioural activation for adolescents with depression: a randomised feasibility trial
Source: PubMed Central journal article supplement — BMJ Open. 2022 Dec 26;12(12):e066357. doi: 10.1136/bmjopen-2022-066357 (PMC9806095; doi:10.1136/bmjopen-2022-066357), 2022-12-26
Supplement: bmjopen-2022-066357supp005.pdf [file bmjopen-2022-066357supp005.pdf]

Table S3. Fixed effects and effect sizes for all measures at follow-up compared to baseline, presented separately for the three groups and types of rater.

| Group<br>Measure       | Guided I-BA (n=11)                        |                                             | Self-guided I-BA (n=10)                   |                                             | TAU (n=11)                                |                                             |
|------------------------|-------------------------------------------|---------------------------------------------|-------------------------------------------|---------------------------------------------|-------------------------------------------|---------------------------------------------|
|                        | Unstandardised coefficient<br>B (95 % CI) | Effect size (Cohen's <i>d</i> , 95<br>% CI) | Unstandardised coefficient<br>B (95 % CI) | Effect size (Cohen's <i>d</i> , 95<br>% CI) | Unstandardised coefficient<br>B (95 % CI) | Effect size (Cohen's <i>d</i> , 95<br>% CI) |
| <i>Clinician-rated</i> |                                           |                                             |                                           |                                             |                                           |                                             |
| CGI-S                  | -0.69 (-1.12 to -0.26)**                  | 1.57 (0.59 to 2.55)                         | -0.85 (-1.24 to -0.46)***                 | 1.94 (1.05 to 2.83)                         | -0.37 (-0.86 to 0.12)                     | 0.85 (-0.26 to 1.96)                        |
| CGAS                   | 6.86 (2.46 to 11.25)**                    | 2.36 (0.85 to 3.87)                         | 4.35 (1.21 to 7.50)**                     | 1.50 (0.42 to 2.58)                         | 5.76 (3.12 to 8.41)***                    | 1.98 (1.07 to 2.89)                         |
| <i>Child-rated</i>     |                                           |                                             |                                           |                                             |                                           |                                             |
| RCADS-S                | -2.12 (-0.92 to -3.32)***                 | 0.66 (0.29 to 1.03)                         | -2.48 (-4.85 to -0.10)*                   | 0.77 (0.03 to 1.50)                         | -0.29 (-2.75 to 2.16)                     | 0.09 (-0.67 to 0.85)                        |
| ARI                    | -0.63 (-1.40 to 0.14)                     | 0.35 (-0.07 to 0.77)                        | -2.01 (-3.37 to -0.65)**                  | 1.10 (0.36 to 1.85)                         | -1.40 (-2.40 to -0.40)**                  | 0.77 (0.22 to 1.31)                         |
| ISI                    | -4.14 (-5.69 to -2.60)***                 | 1.51 (0.94 to 2.07)                         | -2.64 (-4.36 to -0.92)**                  | 0.96 (0.33 to 1.59)                         | -2.69 (-4.91 to -0.47)*                   | 0.98 (0.17 to 1.79)                         |
| KIDSCREEN-10           | 3.03 (1.80 to 4.27)***                    | 1.31 (0.77 to 1.84)                         | 3.46 (1.93 to 4.99)***                    | 1.49 (0.83 to 2.15)                         | 2.71 (0.65 to 4.76)*                      | 1.17 (0.28 to 2.05)                         |
| <i>Parent-rated</i>    |                                           |                                             |                                           |                                             |                                           |                                             |
| WSAS                   | -3.23 (-5.09 to -1.37)**                  | 0.72 (0.31 to 1.14)                         | -1.50 (-3.27 to 0.27)                     | 0.34 (-0.06 to 0.73)                        | -2.63 (-5.31 to 0.04)                     | 0.59 (-0.01 to 1.19)                        |
| RCADS-S                | -1.59 (-2.94 to -0.24)*                   | 0.53 (0.08 to 0.97)                         | -2.20 (-3.58 to -0.82)**                  | 0.73 (0.27 to 1.18)                         | -1.39 (-3.17 to 0.39)                     | 0.46 (-0.13 to 1.05)                        |
| KIDSCREEN-10           | 2.16 (1.14 to 3.17)***                    | 0.86 (0.46 to 1.27)                         | 2.25 (0.74 to 3.76)**                     | 0.90 (0.30 to 1.51)                         | 1.82 (0.01 to 3.62)*                      | 0.73 (0.00 to 1.45)                         |

I-BA = Internet-delivered behavioural activation; TAU = treatment as usual; CGAS = Children's Global Assessment Scale; CGI-S = Clinical Global Impression – Severity; RCADS-S (A/P) = Revised Children's Anxiety and Depression Scale, short version, anxiety subscales, adolescent and parent version; KIDSCREEN-10 (A/P) = a measure for general health-related quality of life, adolescent and parent version; ISI = Insomnia Severity Index; ARI = Affective Reactivity Index; WSAS (P) = Work and Social Adjustment Scale, parent version  
 \* $p < 0.05$ , \*\* $p < 0.01$ , \*\*\* $p < 0.001$ .  
 ‡All Cohen's *d* effect sizes are calculated from the regression model. The 3-month follow-up effect sizes compare to baseline. Effect sizes of 0.2, 0.5 and 0.8 are considered small, moderate and large, respectively.
